# Supplementary material for: Synthesis, In Silico and Kinetics Evaluation of N-(β-d-glucopyranosyl)-2-arylimidazole-4(5)-carboxamides and N-(β-d-glucopyranosyl)-4(5)-arylimidazole-2-carboxamides as Glycogen Phosphorylase Inhibitors
Source: MDPI journal article supplement (doi:10.3390/ijms25094591), 2024-04-23

# Synthesis, *in silico* and kinetics evaluation of *N*-( $\beta$ -D-glucopyranosyl)-2-arylimidazole-4(5)-carboxamides and *N*-( $\beta$ -D-glucopyranosyl)-4(5)-arylimidazole-2-carboxamides as glycogen phosphorylase inhibitors

Levente Homolya,<sup>a</sup> Rachel T. Mathomes,<sup>b</sup> Luca Varga,<sup>c</sup> Tibor Docsa,<sup>c</sup> László Juhász,<sup>\*a</sup>

Joseph M. Hayes,<sup>\*b</sup> and László Somsák<sup>\*a</sup>

<sup>a</sup> Department of Organic Chemistry, University of Debrecen, POB 400, H-4002 Debrecen, Hungary

<sup>b</sup> School of Pharmacy & Biomedical Sciences, University of Central Lancashire, Preston PR1 2HE, United Kingdom

<sup>c</sup> Department of Medical Chemistry, University of Debrecen, Faculty of Medicine, University of Debrecen, 4032 Debrecen, Hungary

## Table of Contents

|                                                                                                                                          |    |
|------------------------------------------------------------------------------------------------------------------------------------------|----|
| Ethyl 2-phenyl-1 <i>H</i> -imidazole-4(5)-carboxylate (4a).....                                                                          | 3  |
| Ethyl 2-(1-naphthyl)-1 <i>H</i> -imidazole-4(5)-carboxylate (4b).....                                                                    | 5  |
| Ethyl 2-(2-naphthyl)-1 <i>H</i> -imidazole-4(5)-carboxylate (4c) .....                                                                   | 7  |
| 2-Phenyl-1 <i>H</i> -imidazole-4(5)-carboxylic acid (5a) .....                                                                           | 9  |
| 2-(1-Naphthyl)-1 <i>H</i> -imidazole-4(5)-carboxylic acid (5b) .....                                                                     | 11 |
| 2-(2-Naphthyl)-1 <i>H</i> -imidazole-4(5)-carboxylic acid (5c).....                                                                      | 13 |
| Ethyl 4(5)-phenyl-1 <i>H</i> -imidazole-2-carboxylate (7a).....                                                                          | 15 |
| Ethyl 4(5)-(1-naphthyl)-1 <i>H</i> -imidazole-2-carboxylate (7b).....                                                                    | 16 |
| Ethyl 4(5)-(2-naphthyl)-1 <i>H</i> -imidazole-2-carboxylate (7c) .....                                                                   | 18 |
| 4(5)-Phenyl-1 <i>H</i> -imidazole-2-carboxylic acid (8a) .....                                                                           | 20 |
| 4(5)-(1-Naphthyl)-1 <i>H</i> -imidazole-2-carboxylic acid (8b) .....                                                                     | 21 |
| 4(5)-(2-Naphthyl)-1 <i>H</i> -imidazole-2-carboxylic acid (8c).....                                                                      | 23 |
| <i>N</i> -(2,3,4,6-Tetra- <i>O</i> -acetyl- $\beta$ -D-glucopyranosyl)-2-phenyl-1 <i>H</i> -imidazole-4(5)-carboxamide (10a).....        | 25 |
| <i>N</i> -(2,3,4,6-Tetra- <i>O</i> -acetyl- $\beta$ -D-glucopyranosyl)-2-(1-naphthyl)-1 <i>H</i> -imidazole-4(5)-carboxamide (10b) ..... | 28 |
| <i>N</i> -(2,3,4,6-Tetra- <i>O</i> -acetyl- $\beta$ -D-glucopyranosyl)-2-(2-naphthyl)-1 <i>H</i> -imidazole-4(5)-carboxamide (10c) ..... | 31 |

|                                                                                                                                    |    |
|------------------------------------------------------------------------------------------------------------------------------------|----|
| <i>N</i> -(2,3,4,6-Tetra- <i>O</i> -acetyl- $\beta$ -D-glucopyranosyl)-4(5)-phenyl-1 <i>H</i> -imidazole-2-carboxamide (11a)       | 34 |
| <i>N</i> -(2,3,4,6-Tetra- <i>O</i> -acetyl- $\beta$ -D-glucopyranosyl)-4(5)-(1-naphthyl)-1 <i>H</i> -imidazole-2-carboxamide (11b) | 37 |
| <i>N</i> -(2,3,4,6-Tetra- <i>O</i> -acetyl- $\beta$ -D-glucopyranosyl)-4(5)-(2-naphthyl)-1 <i>H</i> -imidazole-2-carboxamide (11c) | 40 |
| <i>N</i> -( $\beta$ -D-Glucopyranosyl)-2-phenyl-1 <i>H</i> -imidazole-4(5)-carboxamide (1a)                                        | 43 |
| <i>N</i> -( $\beta$ -D-Glucopyranosyl)-2-(1-naphthyl)-1 <i>H</i> -imidazole-4(5)-carboxamide (1b)                                  | 46 |
| <i>N</i> -( $\beta$ -D-Glucopyranosyl)-2-(2-naphthyl)-1 <i>H</i> -imidazole-4(5)-carboxamide (1c)                                  | 49 |
| <i>N</i> -( $\beta$ -D-Glucopyranosyl)-4(5)-phenyl-1 <i>H</i> -imidazole-2-carboxamide (2a)                                        | 52 |
| <i>N</i> -( $\beta$ -D-Glucopyranosyl)-4(5)-(1-naphthyl)-1 <i>H</i> -imidazole-2-carboxamide (2b)                                  | 55 |
| <i>N</i> -( $\beta$ -D-Glucopyranosyl)-4(5)-(2-naphthyl)-1 <i>H</i> -imidazole-2-carboxamide (2c)                                  | 58 |

# **Ethyl 2-phenyl-1*H*-imidazole-4(5)-carboxylate (4a)**

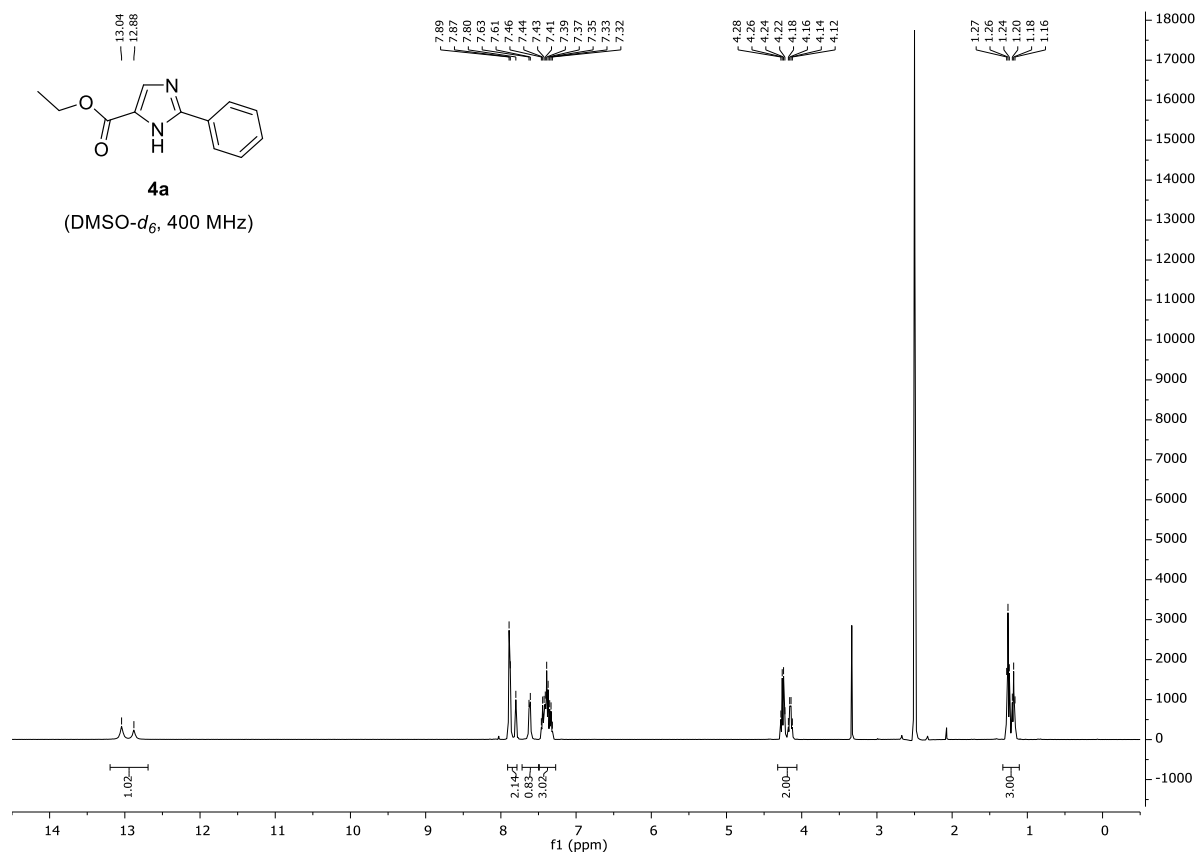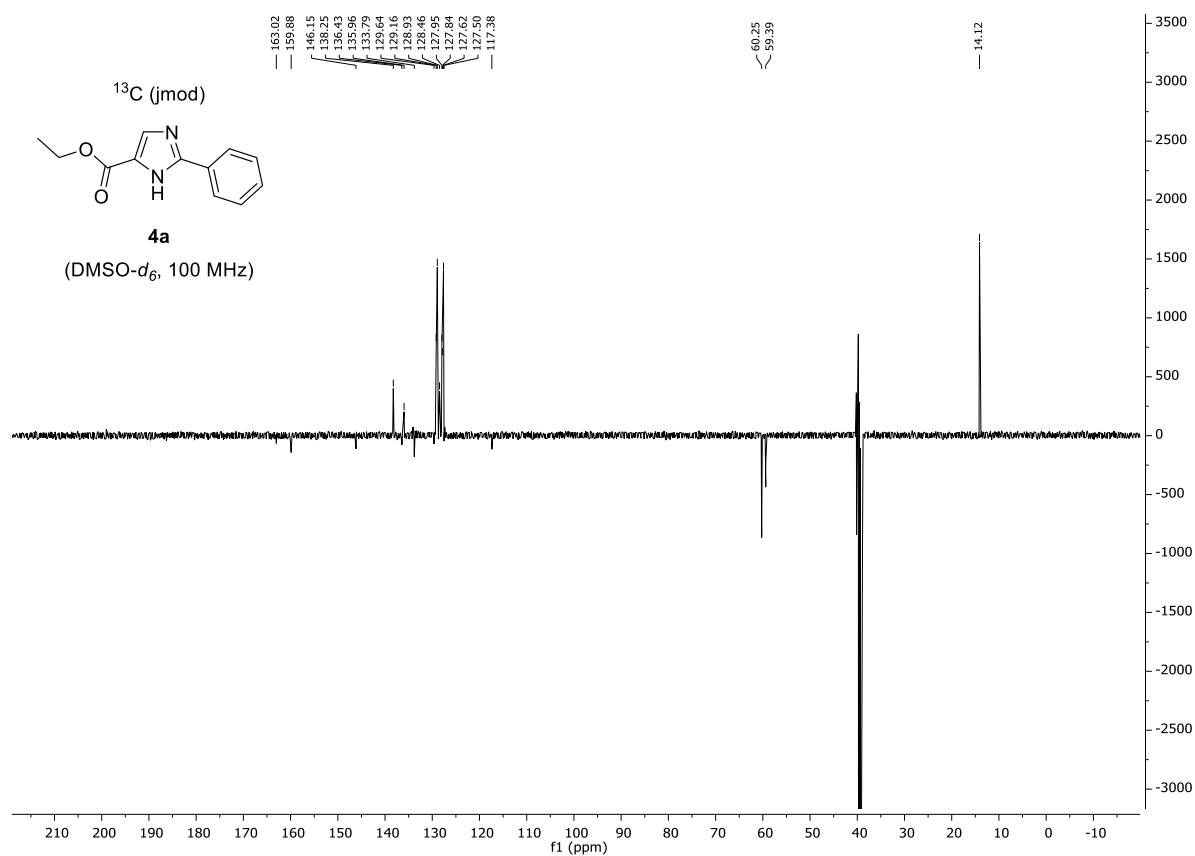

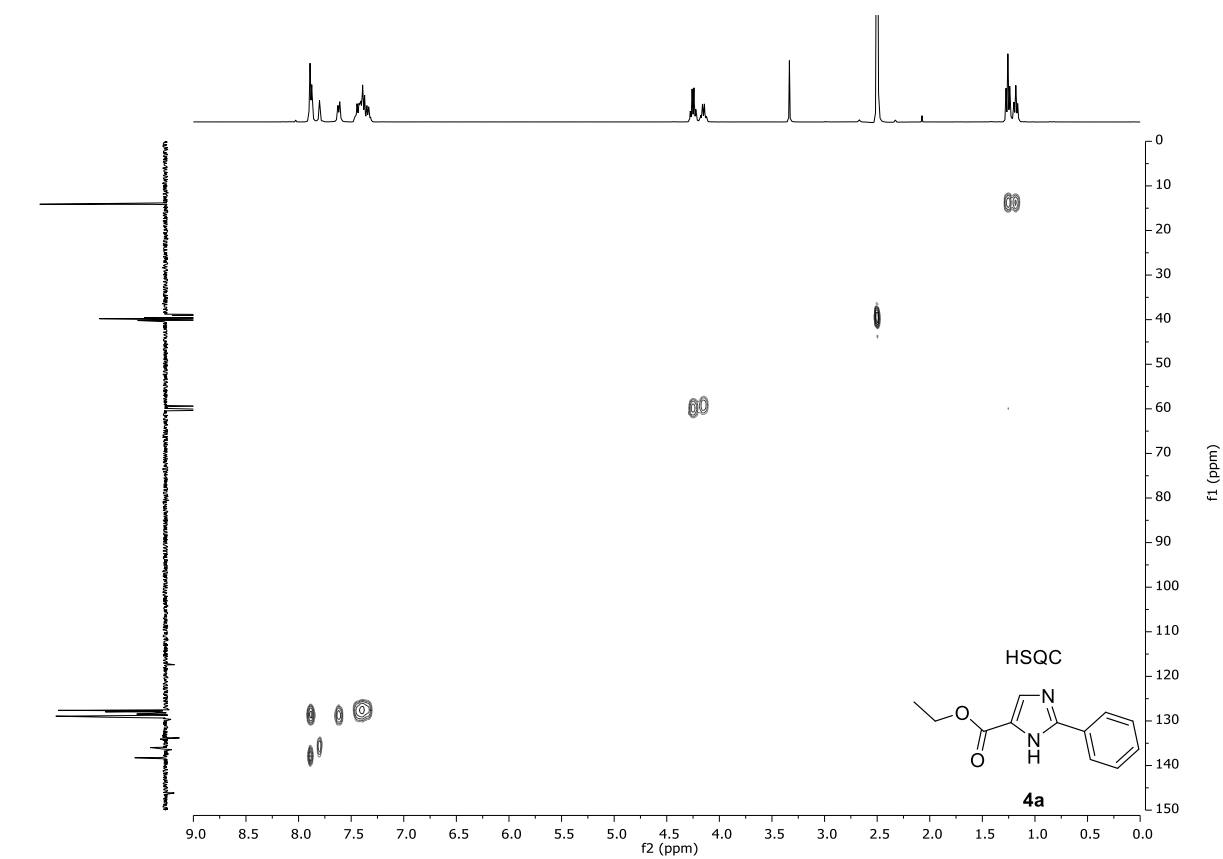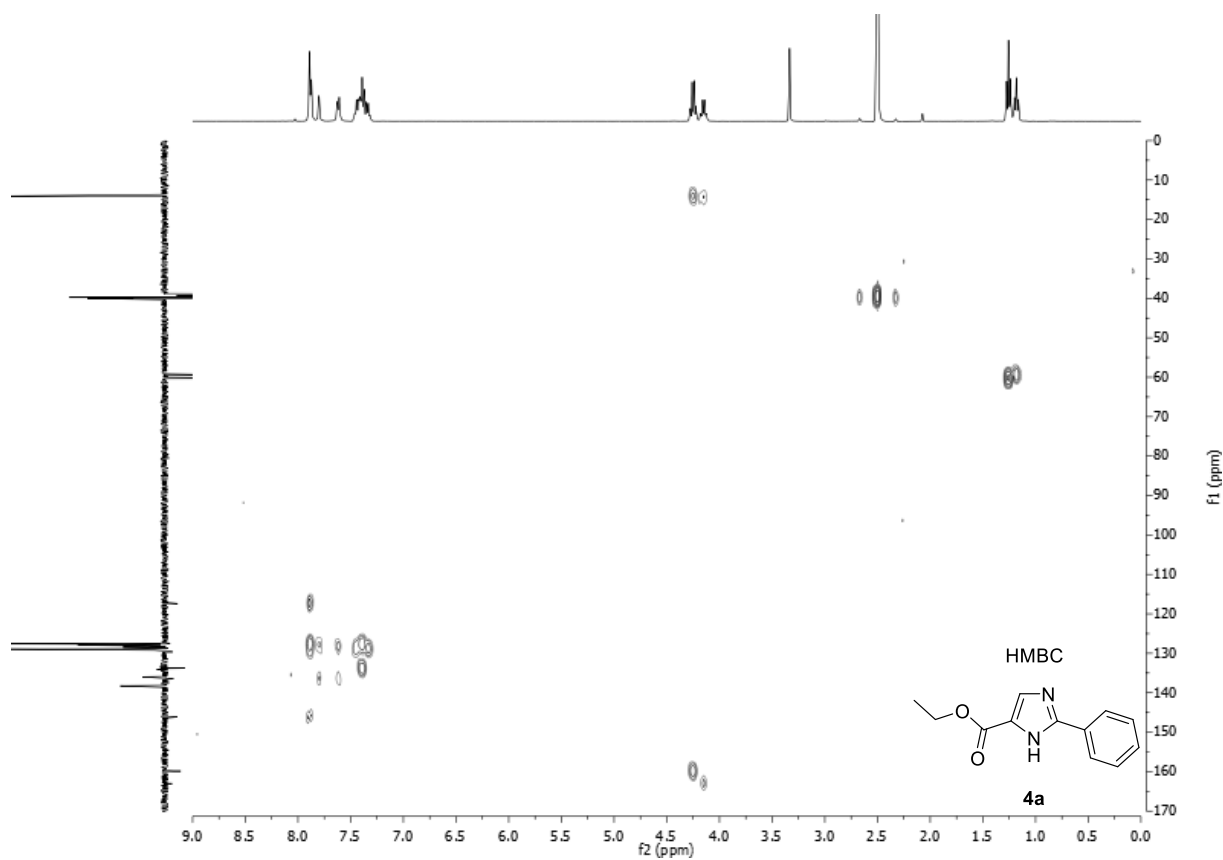



# **Ethyl 2-(1-naphthyl)-1*H*-imidazole-4(5)-carboxylate (4b)**

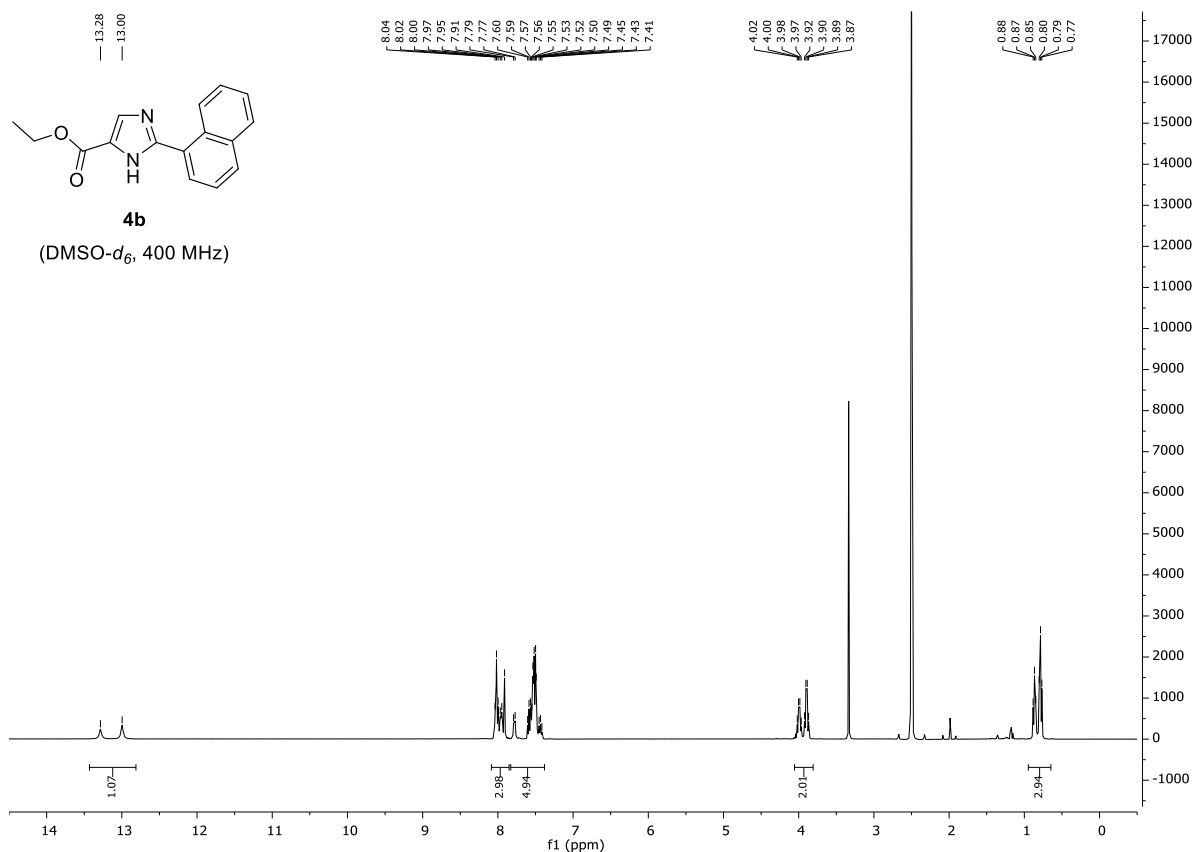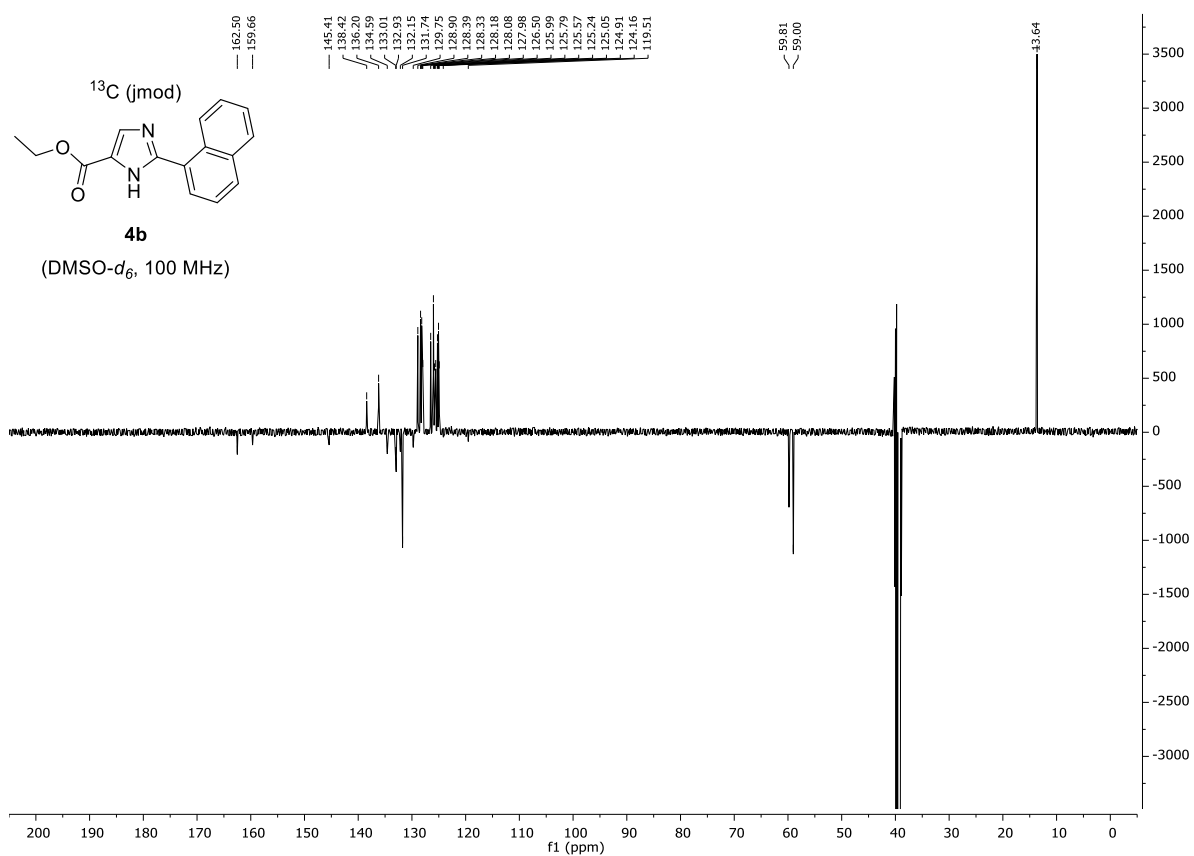

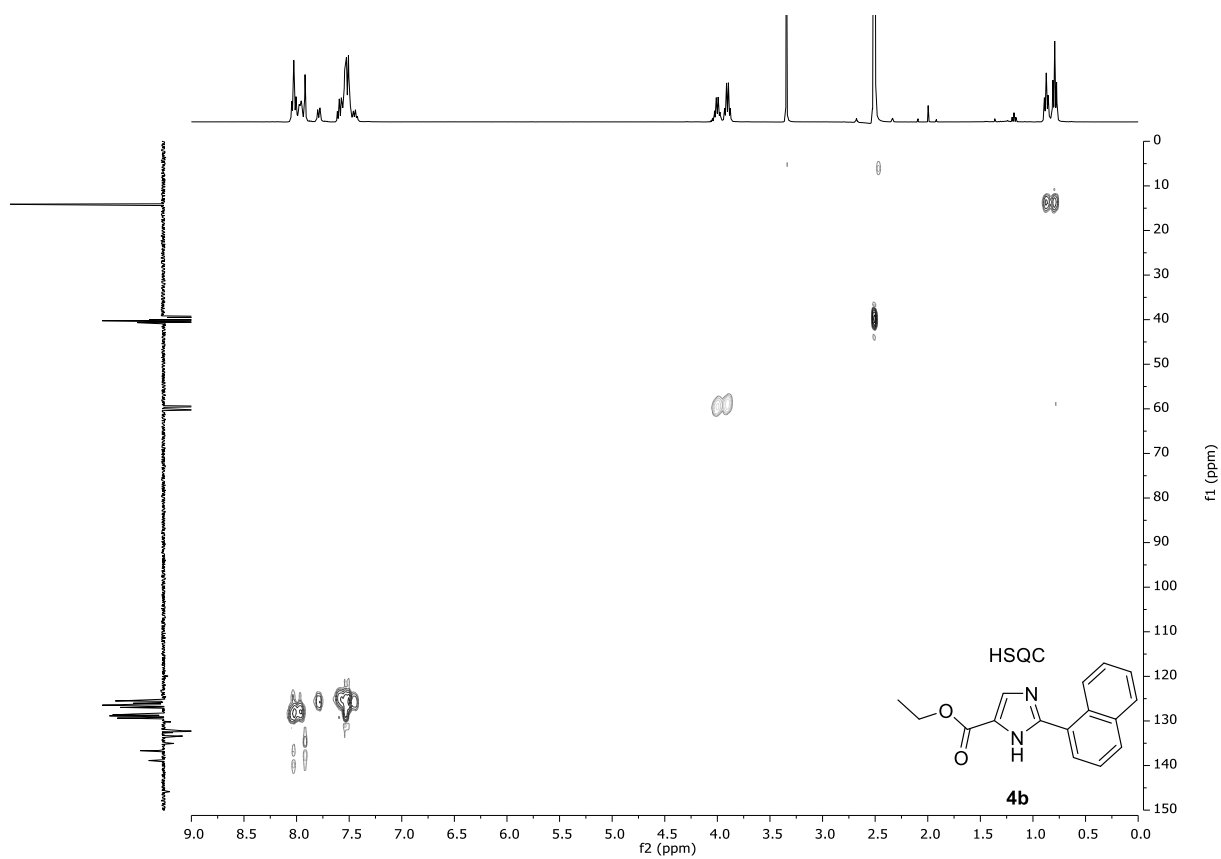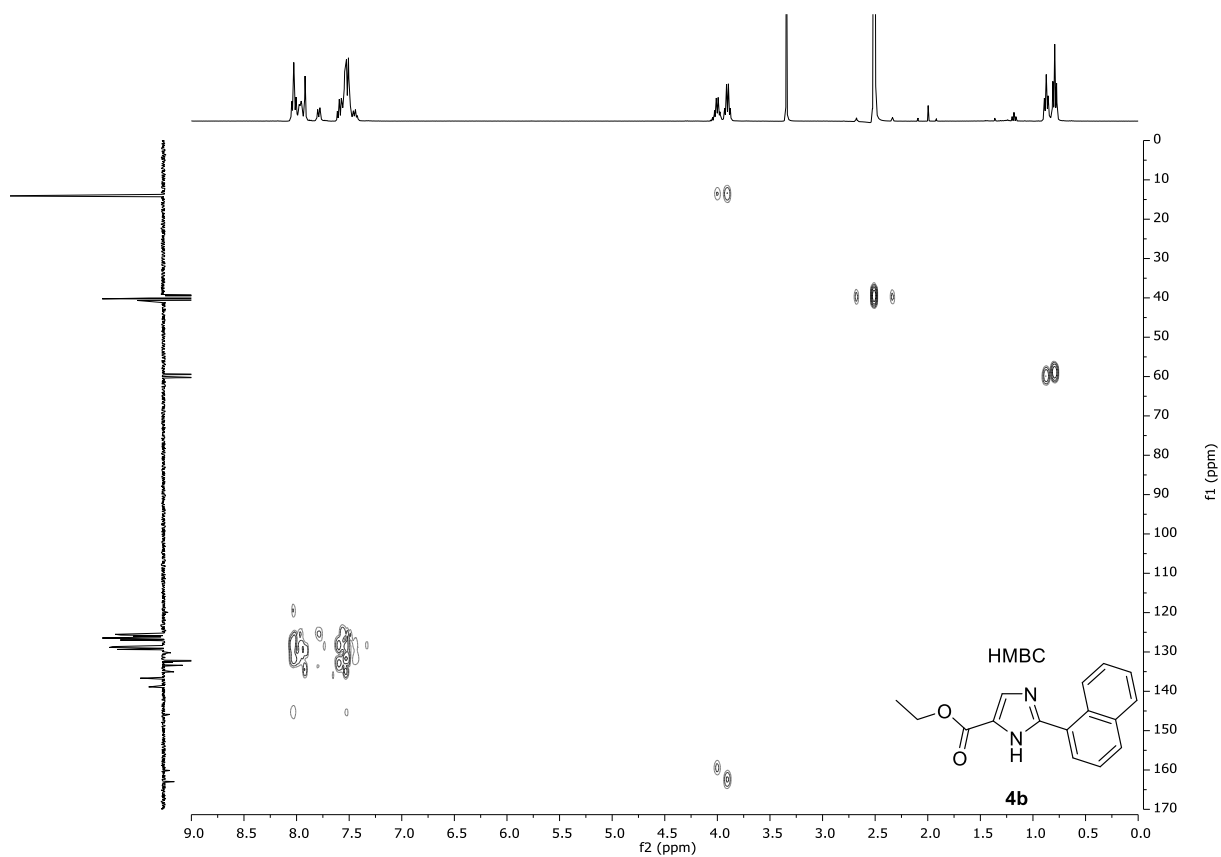

# **Ethyl 2-(2-naphthyl)-1*H*-imidazole-4(5)-carboxylate (4c)**

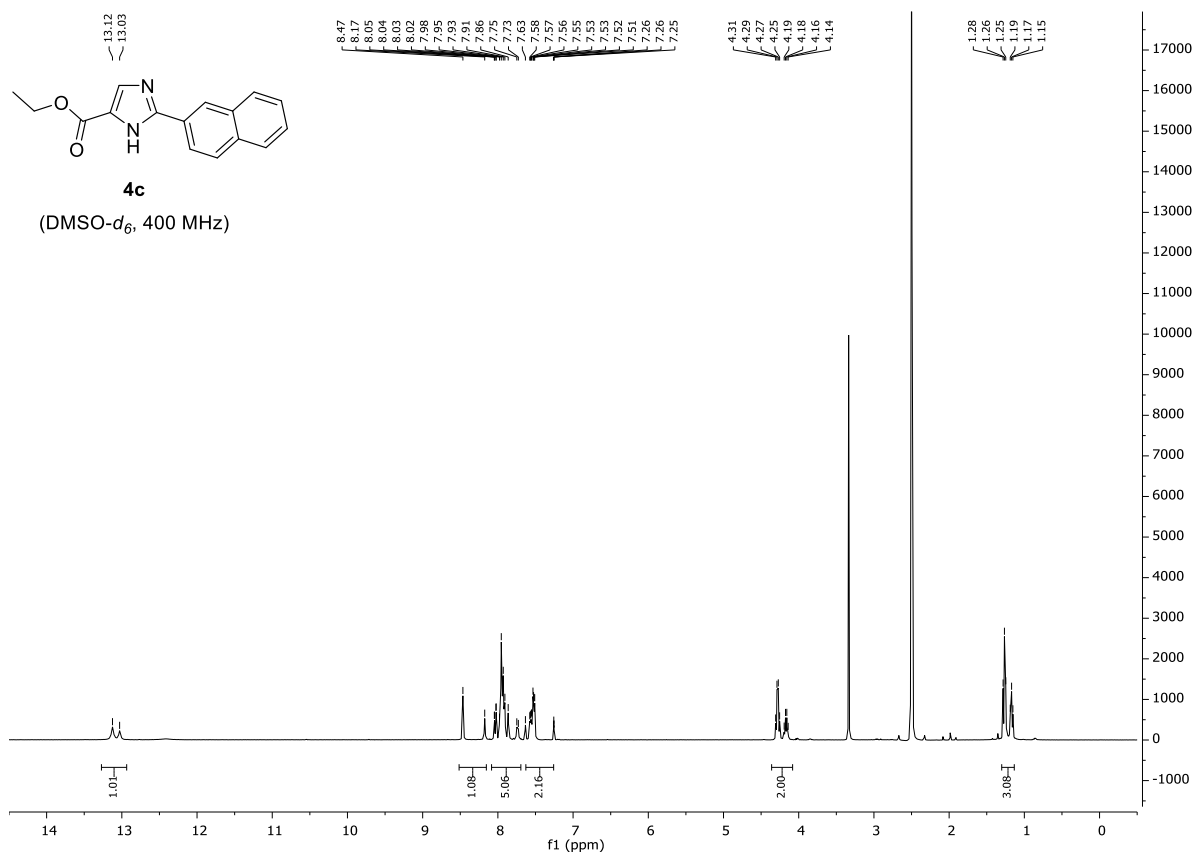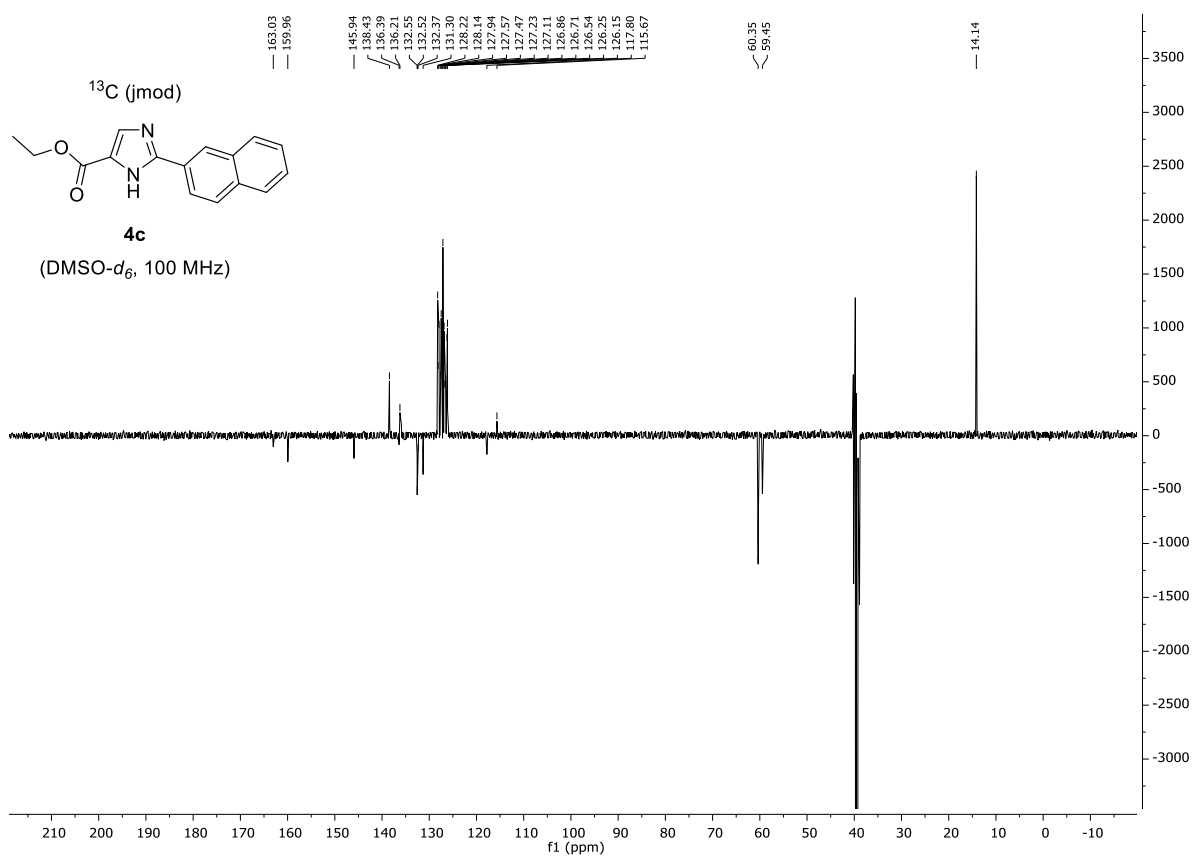

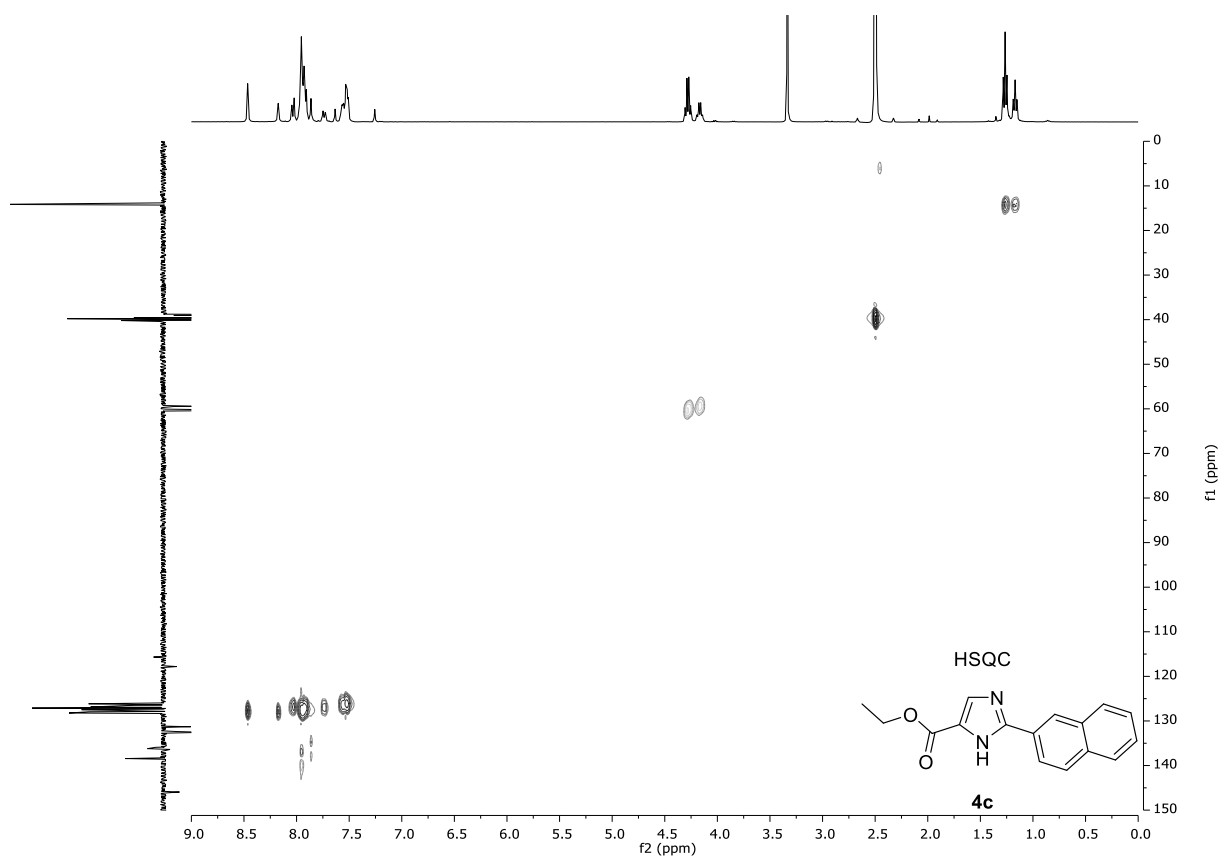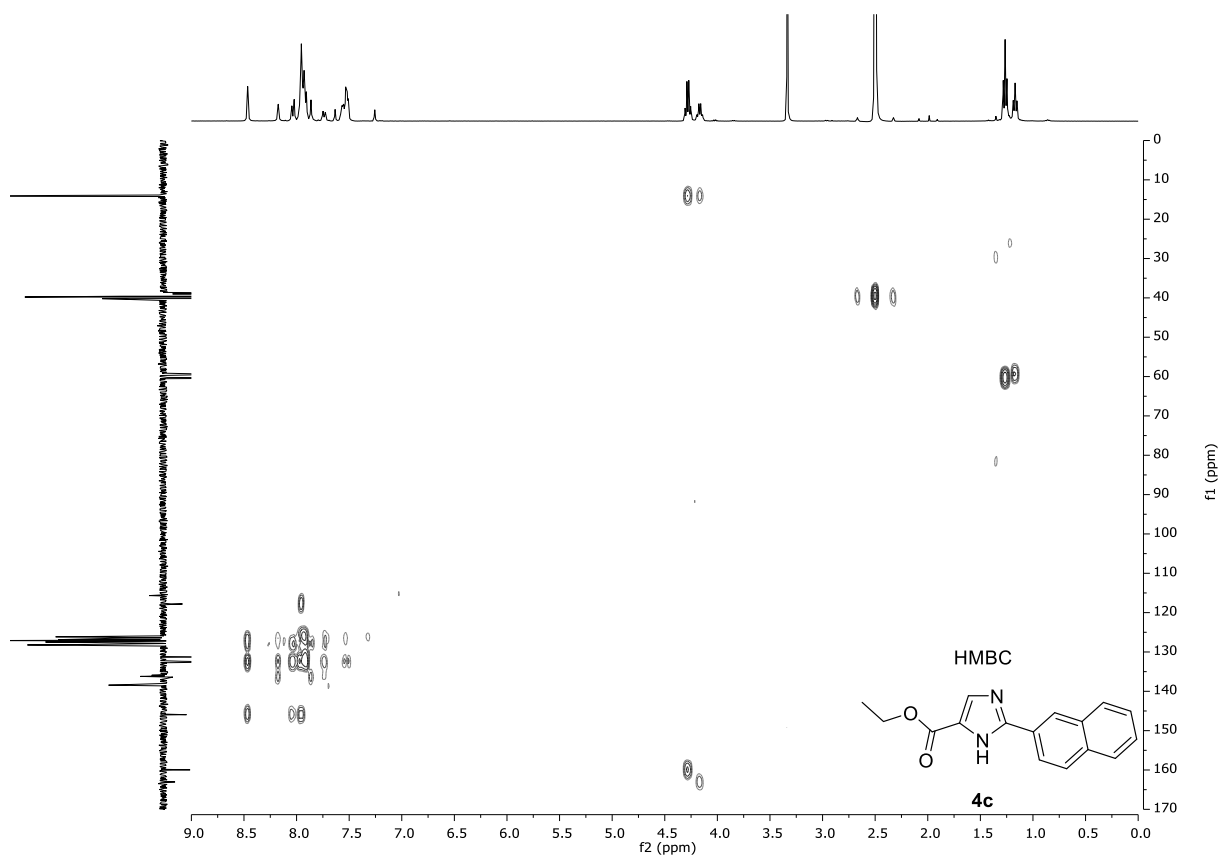

## 2-Phenyl-1*H*-imidazole-4(5)-carboxylic acid (**5a**)

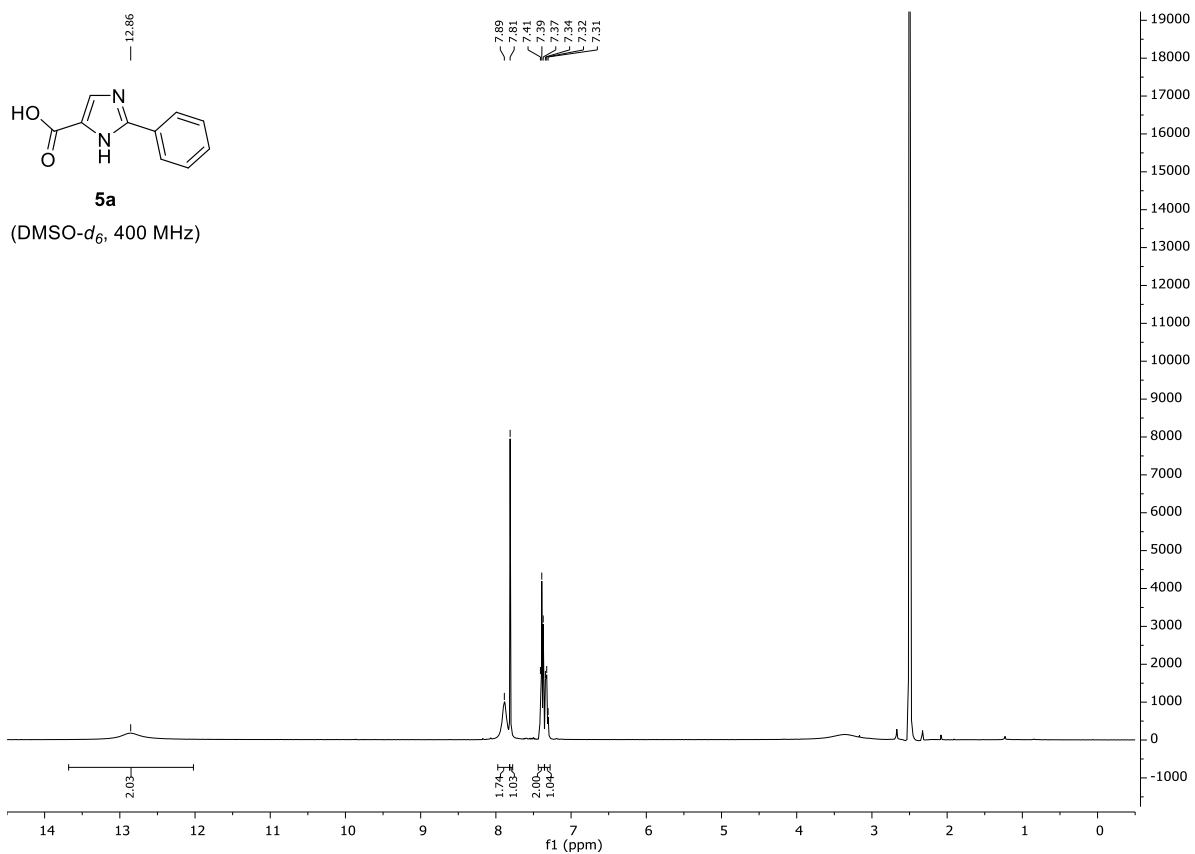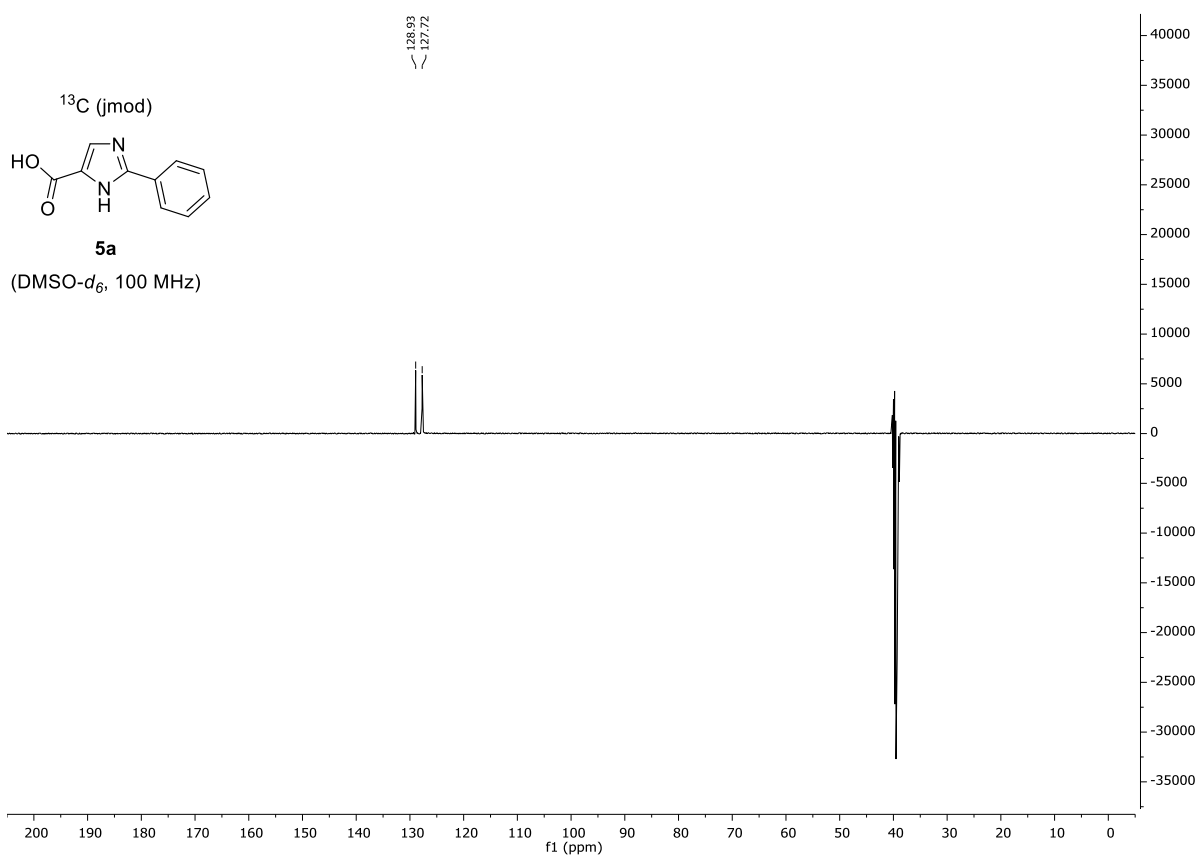

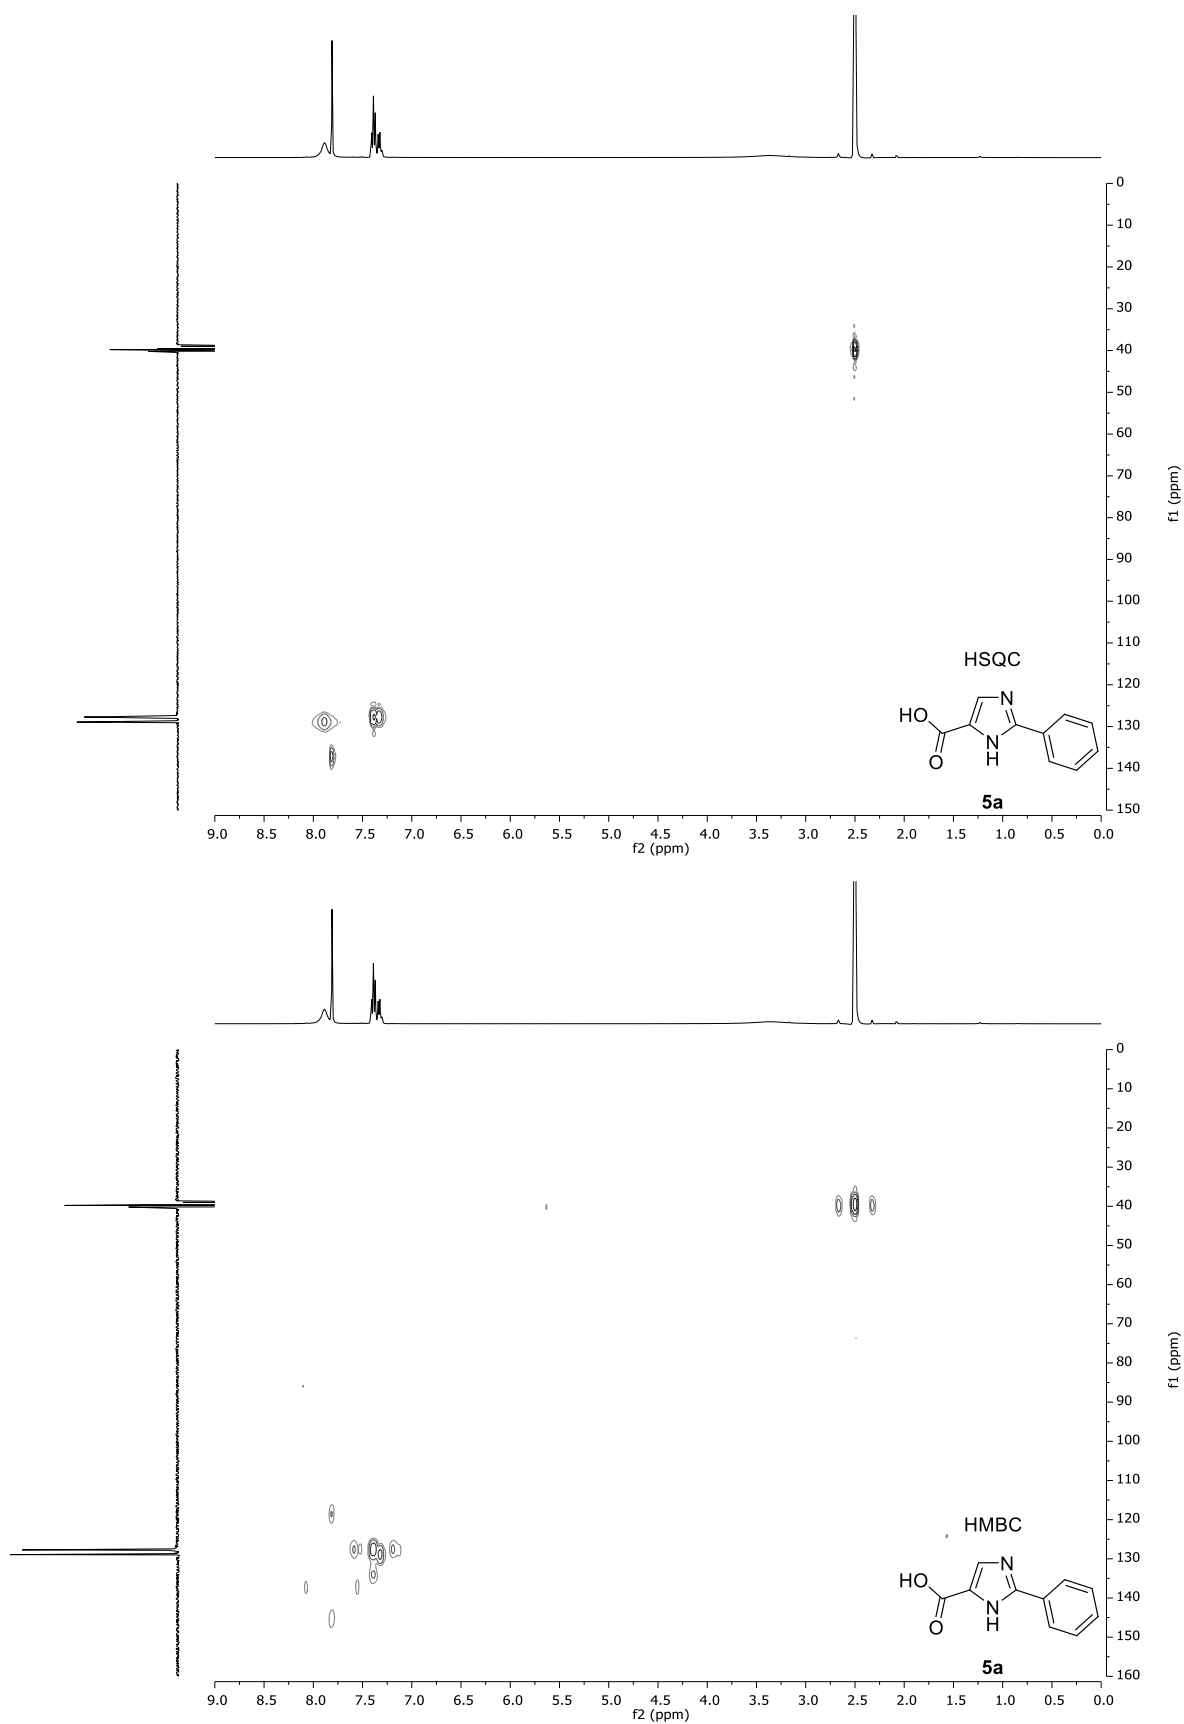

## 2-(1-Naphthyl)-1*H*-imidazole-4(5*H*)-carboxylic acid (**5b**)

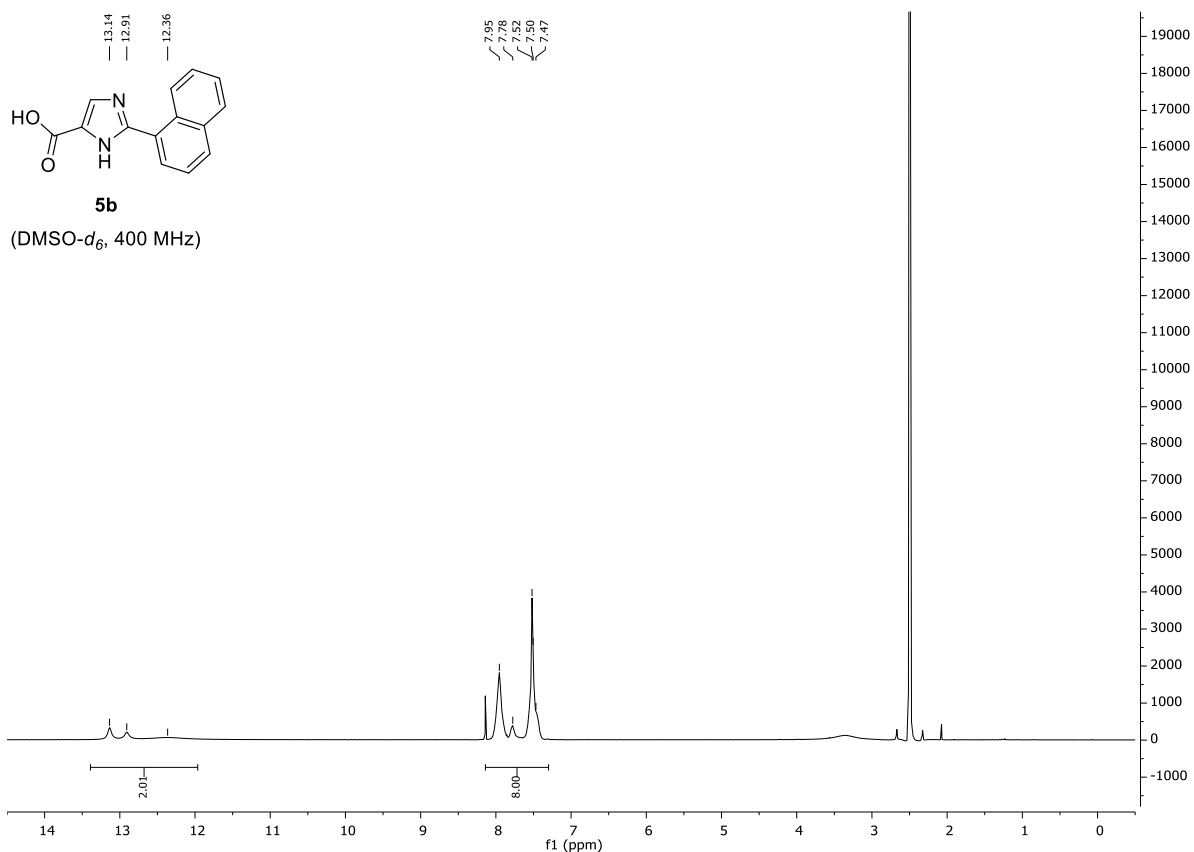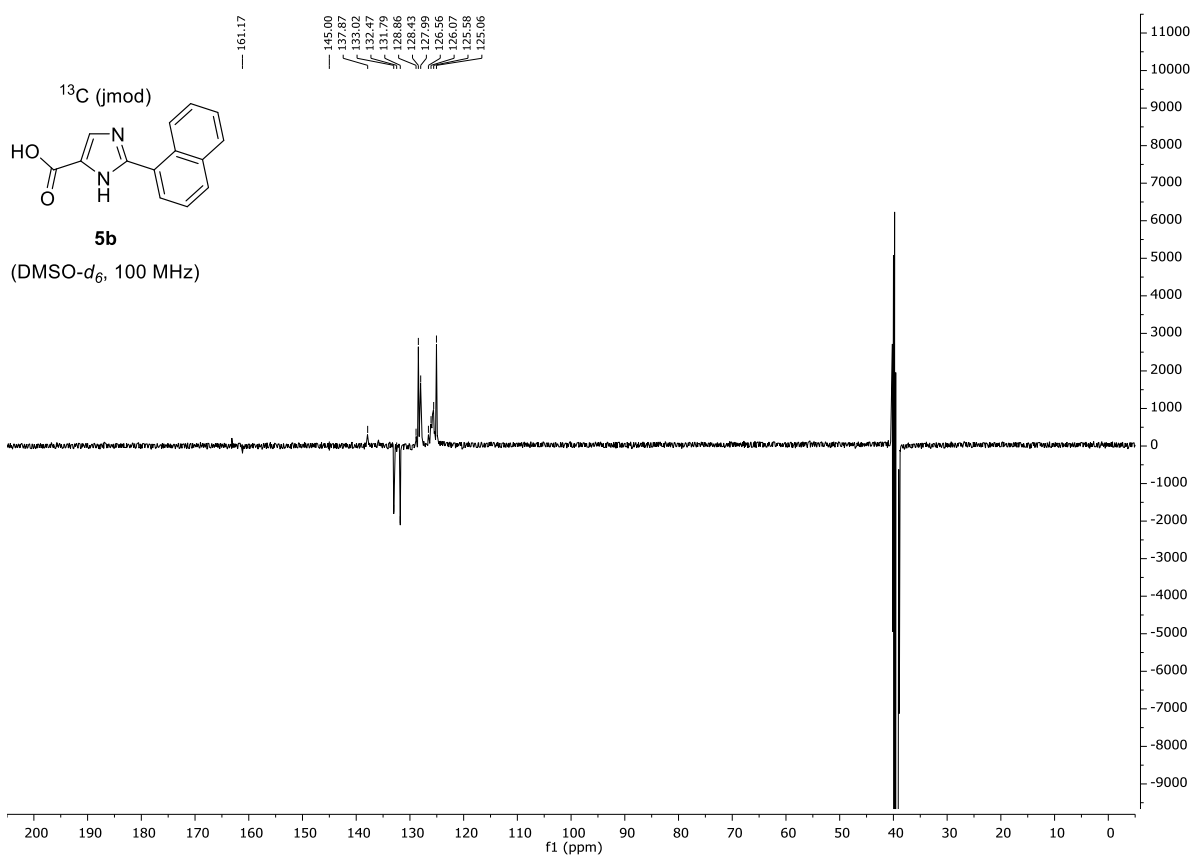

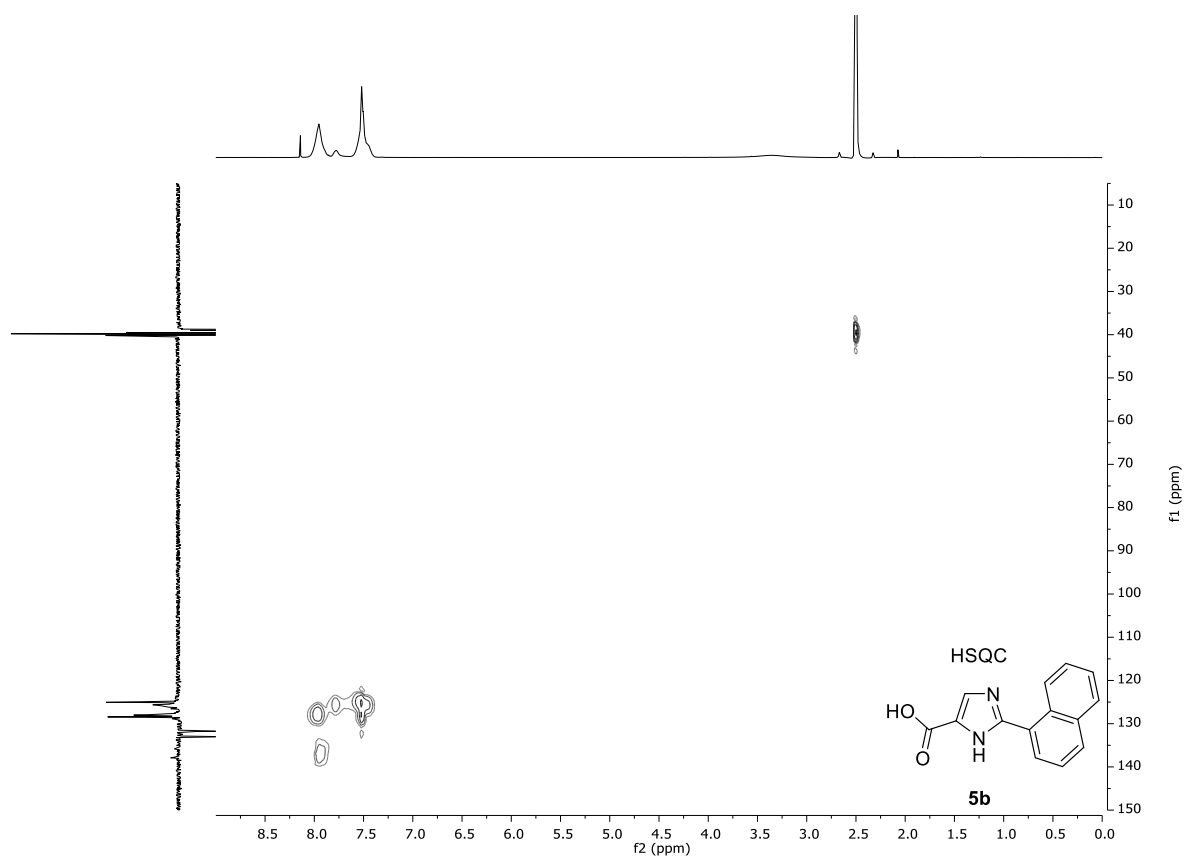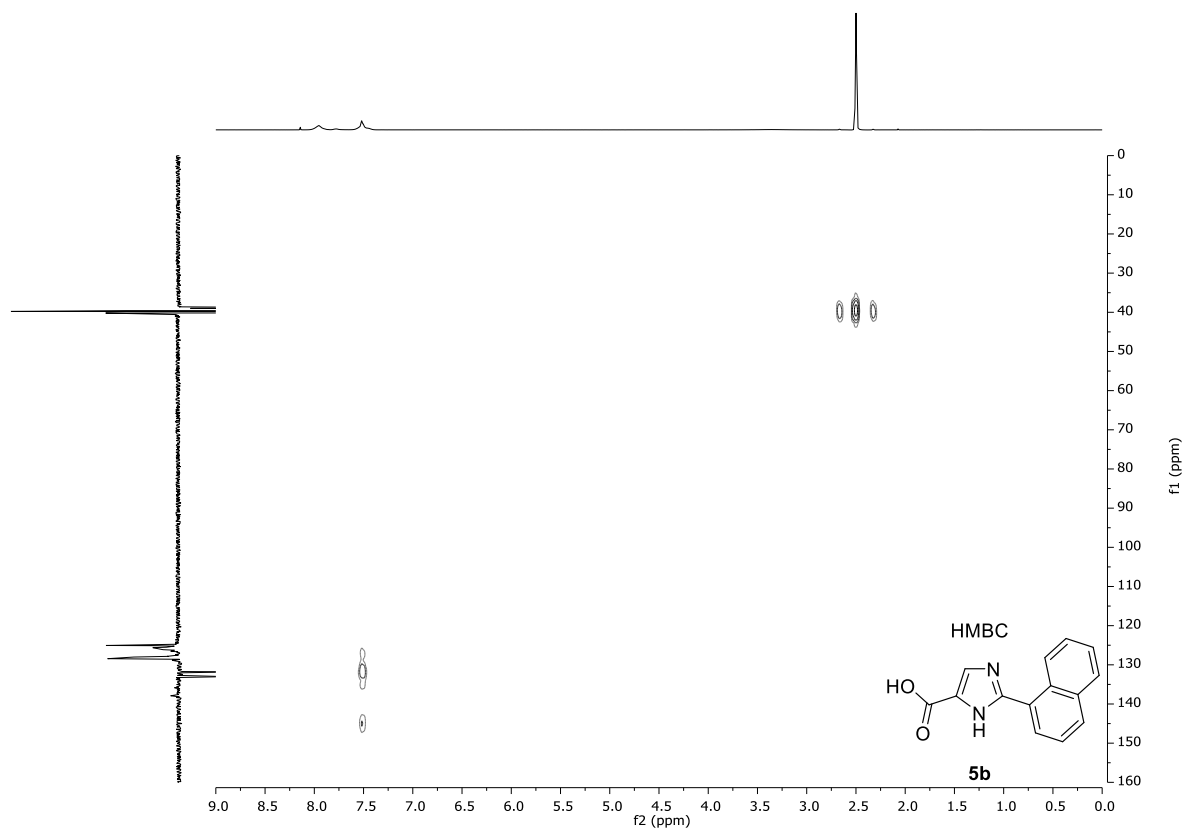



## 2-(2-Naphthyl)-1*H*-imidazole-4(5*H*)-carboxylic acid (**5c**)

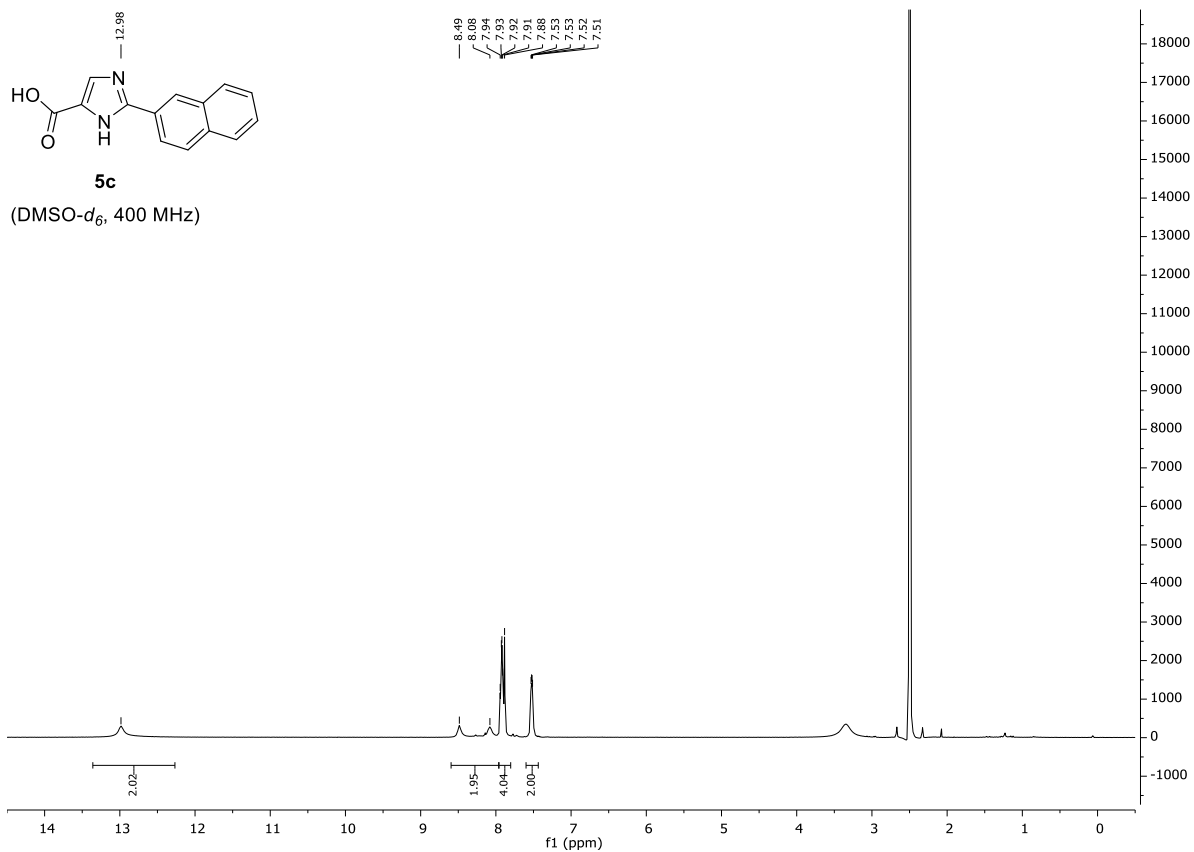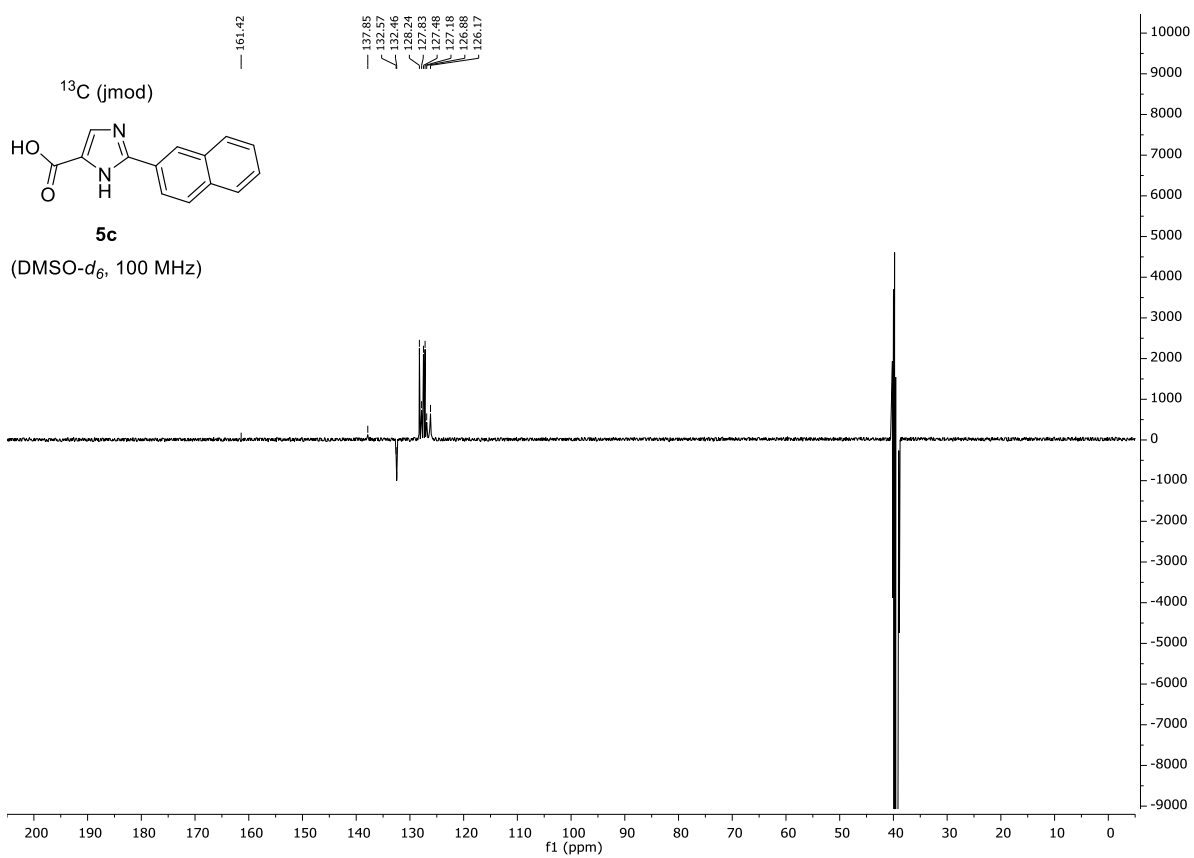

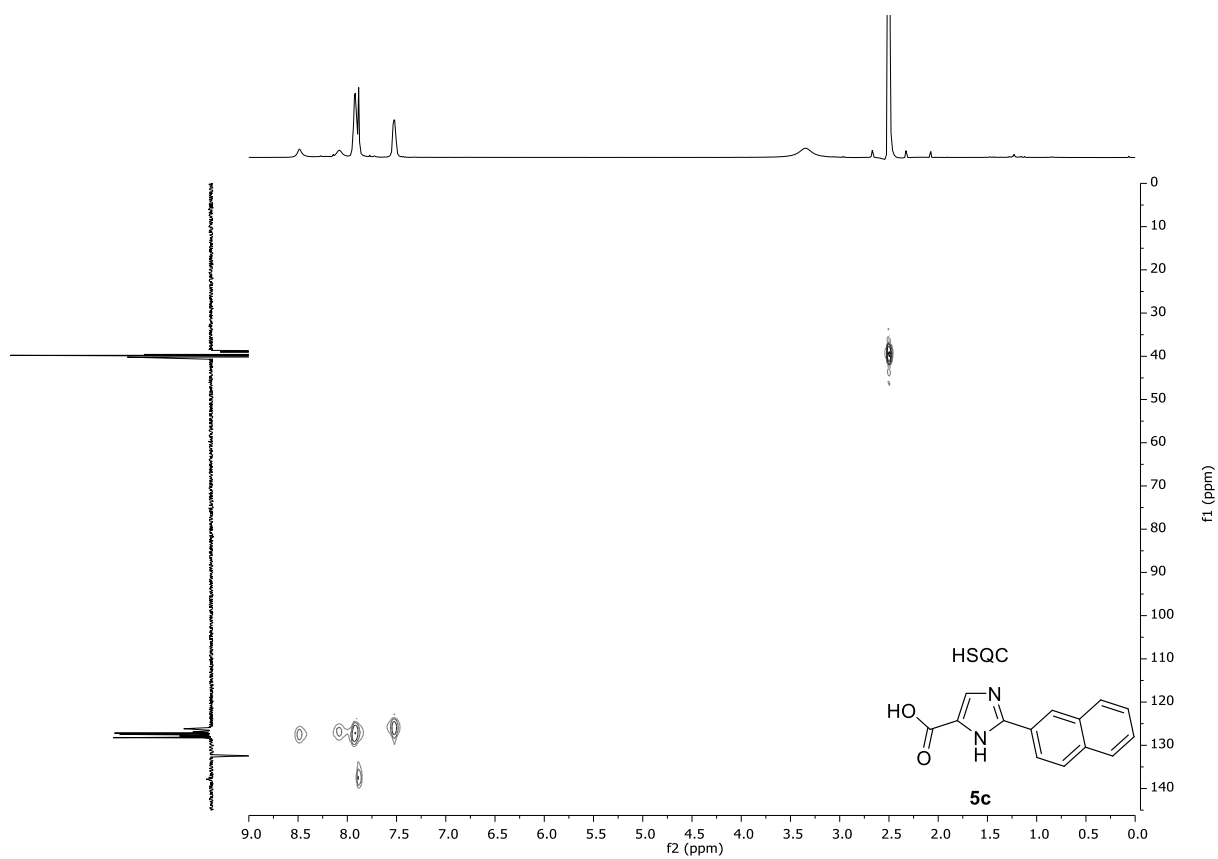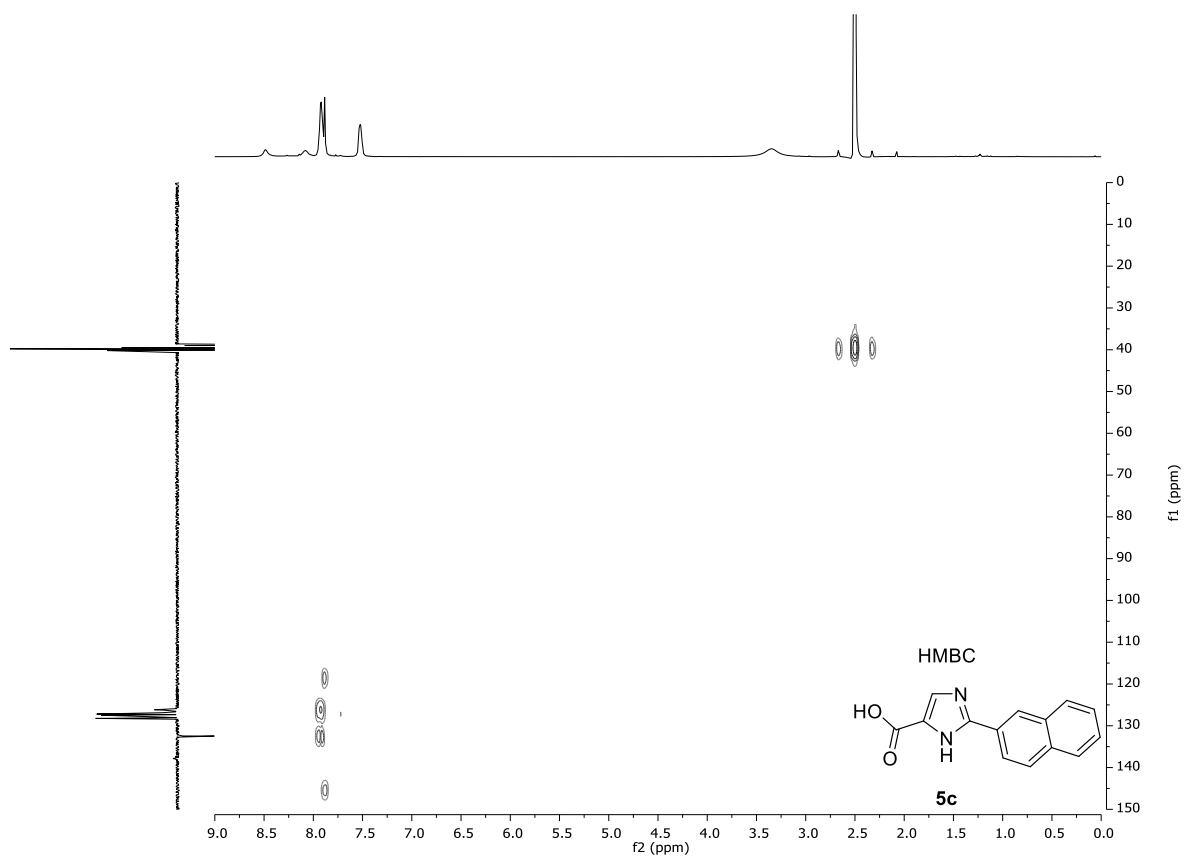

# **Ethyl 4(5)-phenyl-1*H*-imidazole-2-carboxylate (7a)**

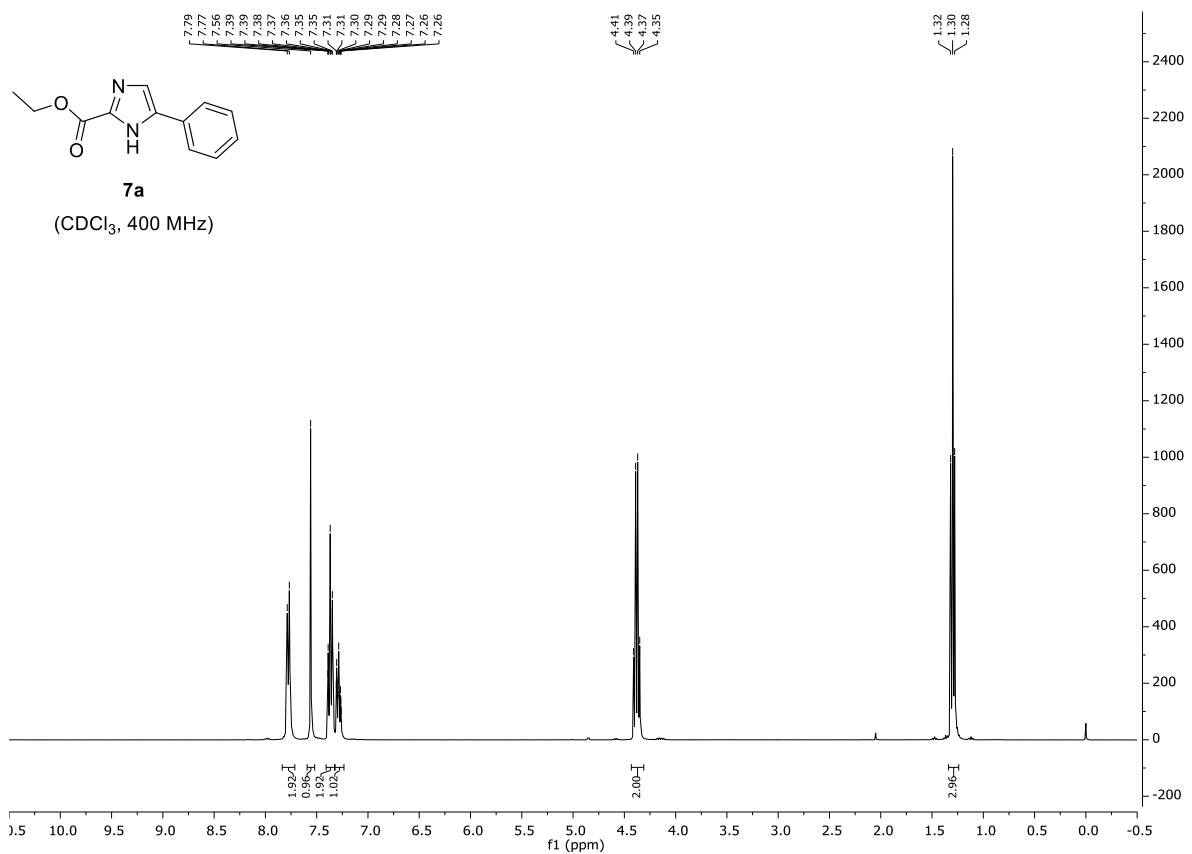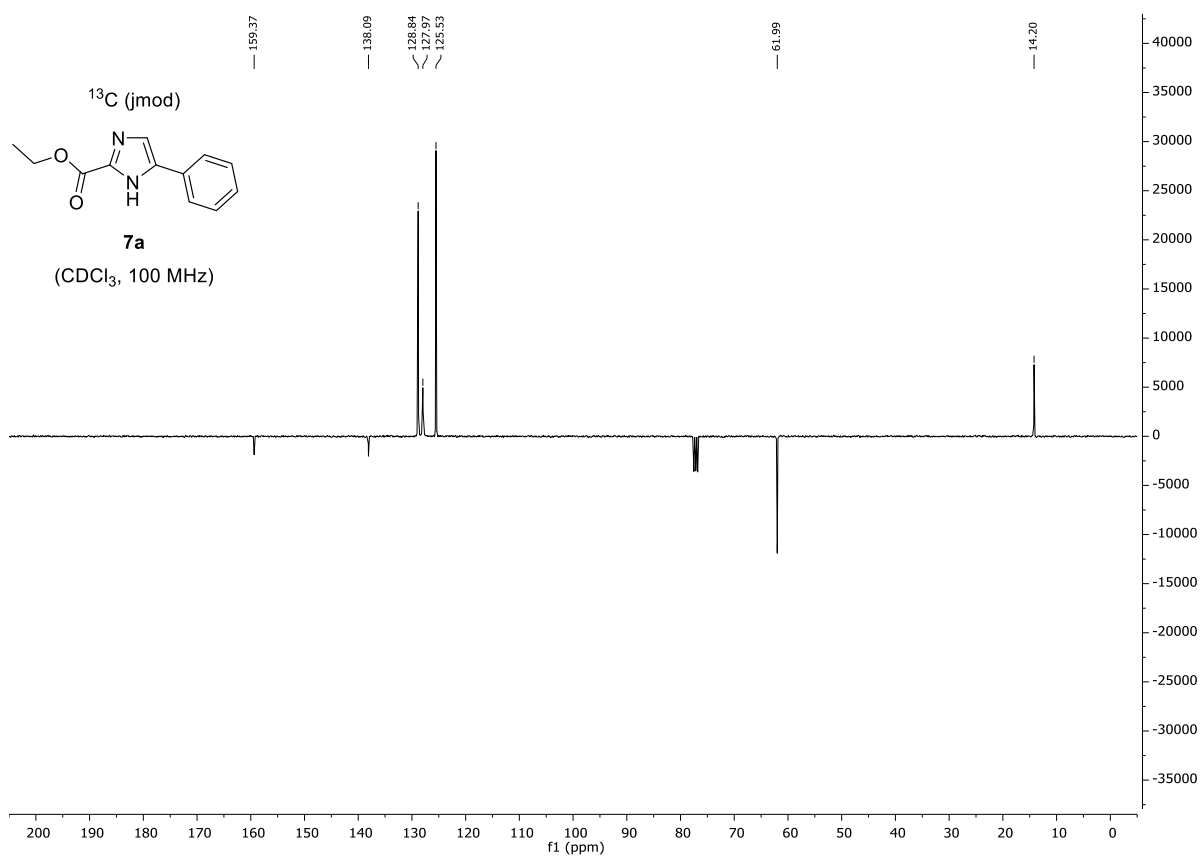

# **Ethyl 4(5)-(1-naphthyl)-1*H*-imidazole-2-carboxylate (**7b**)**

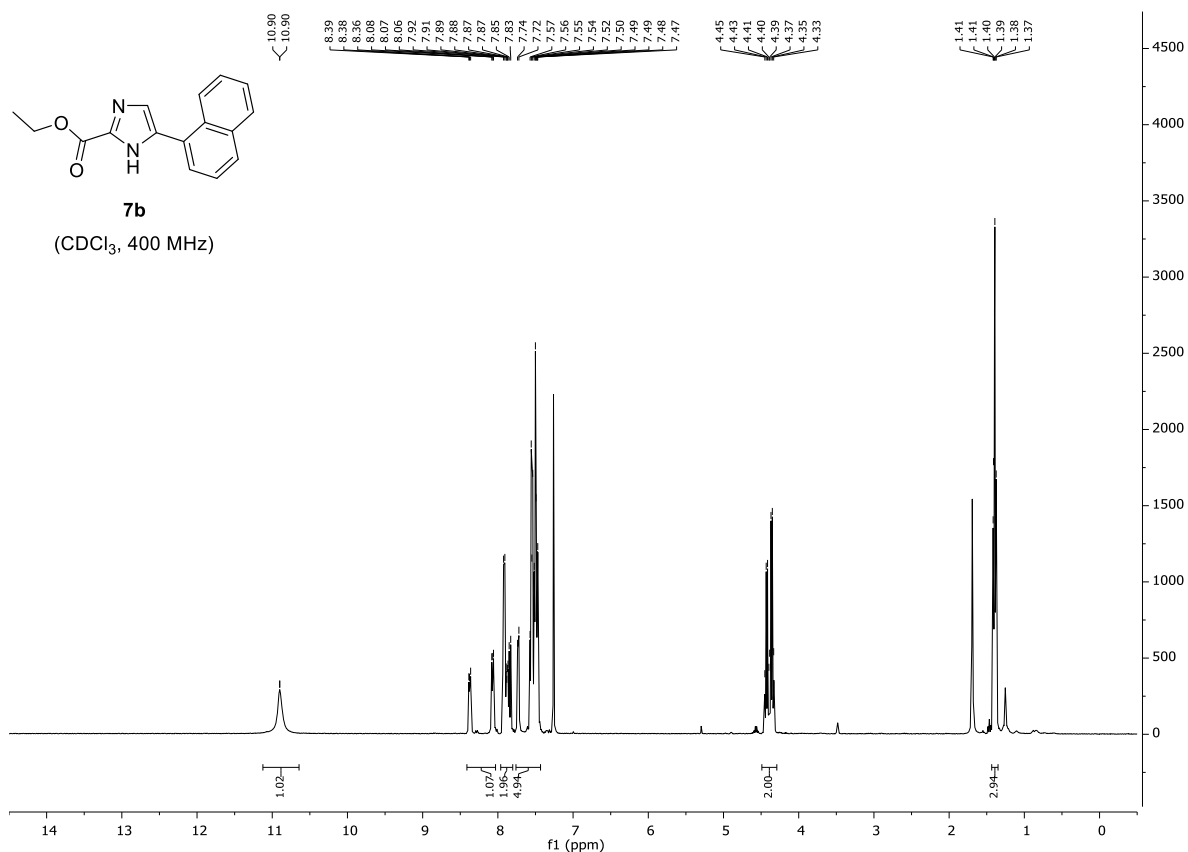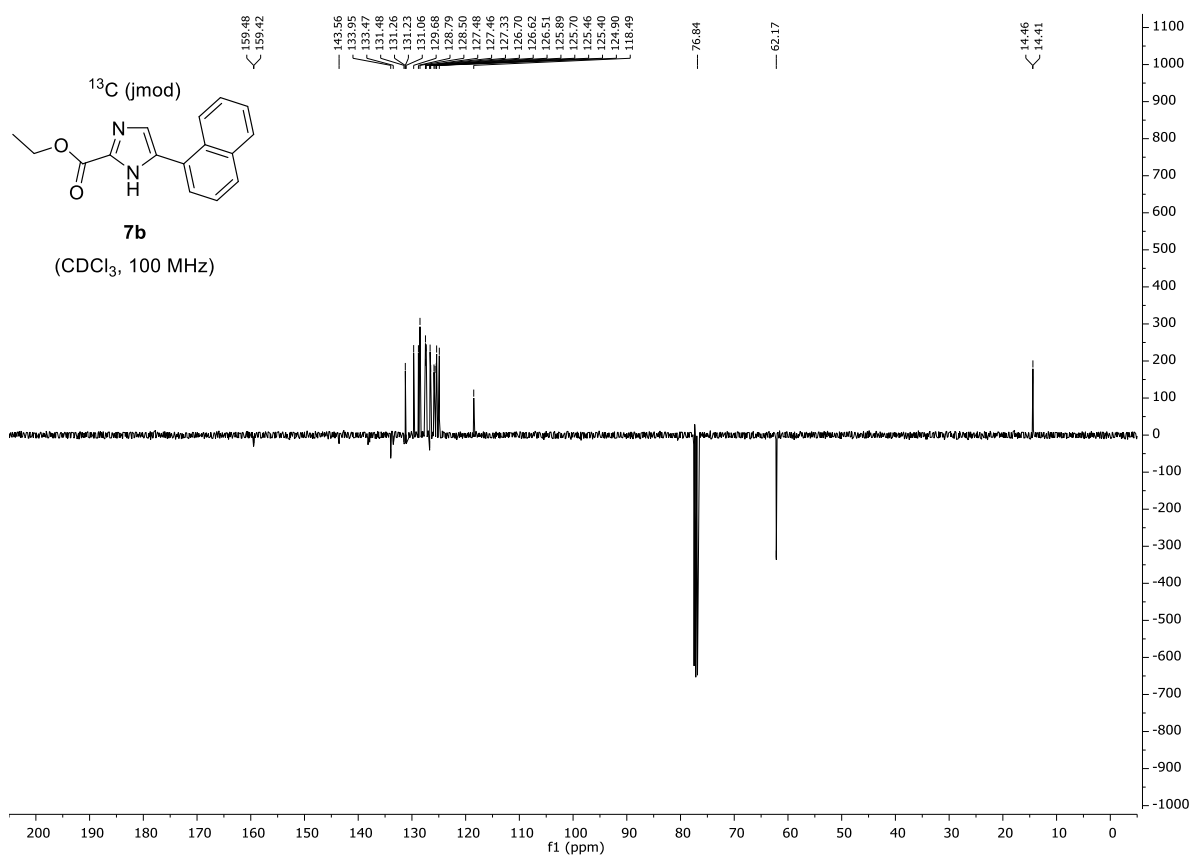

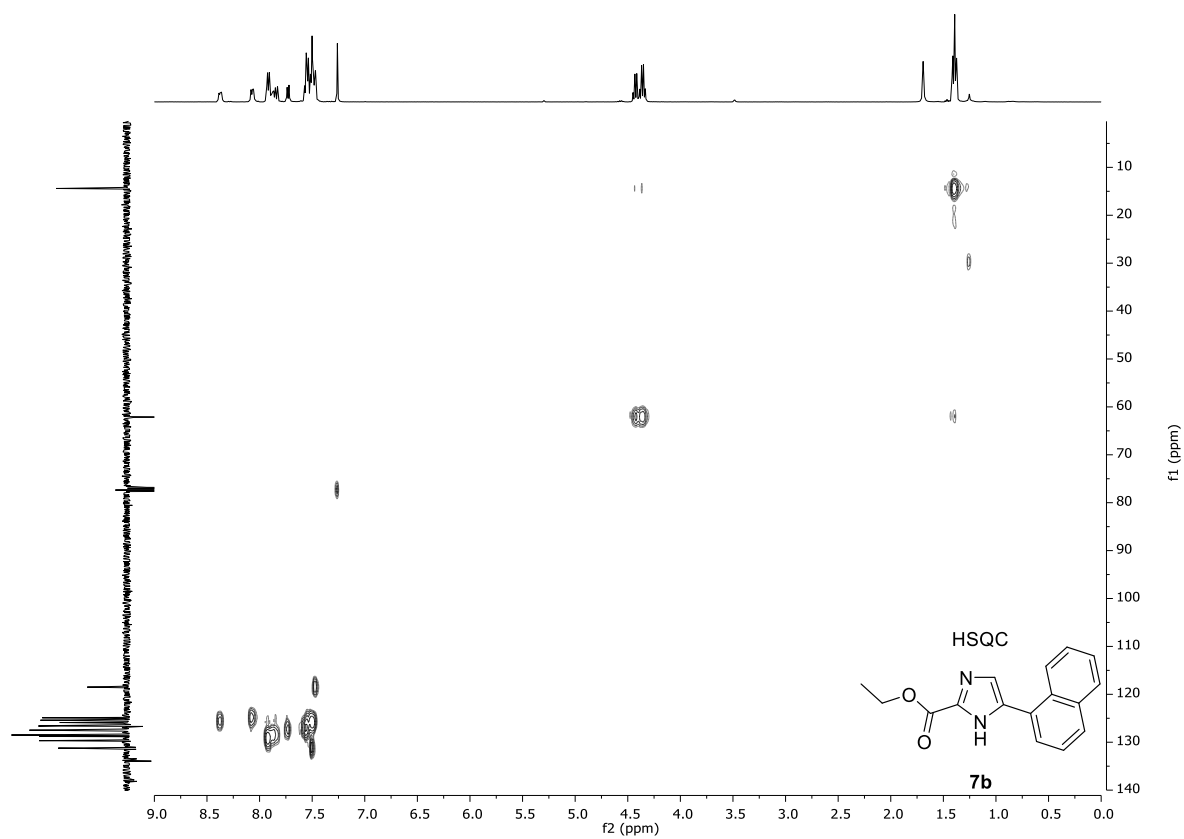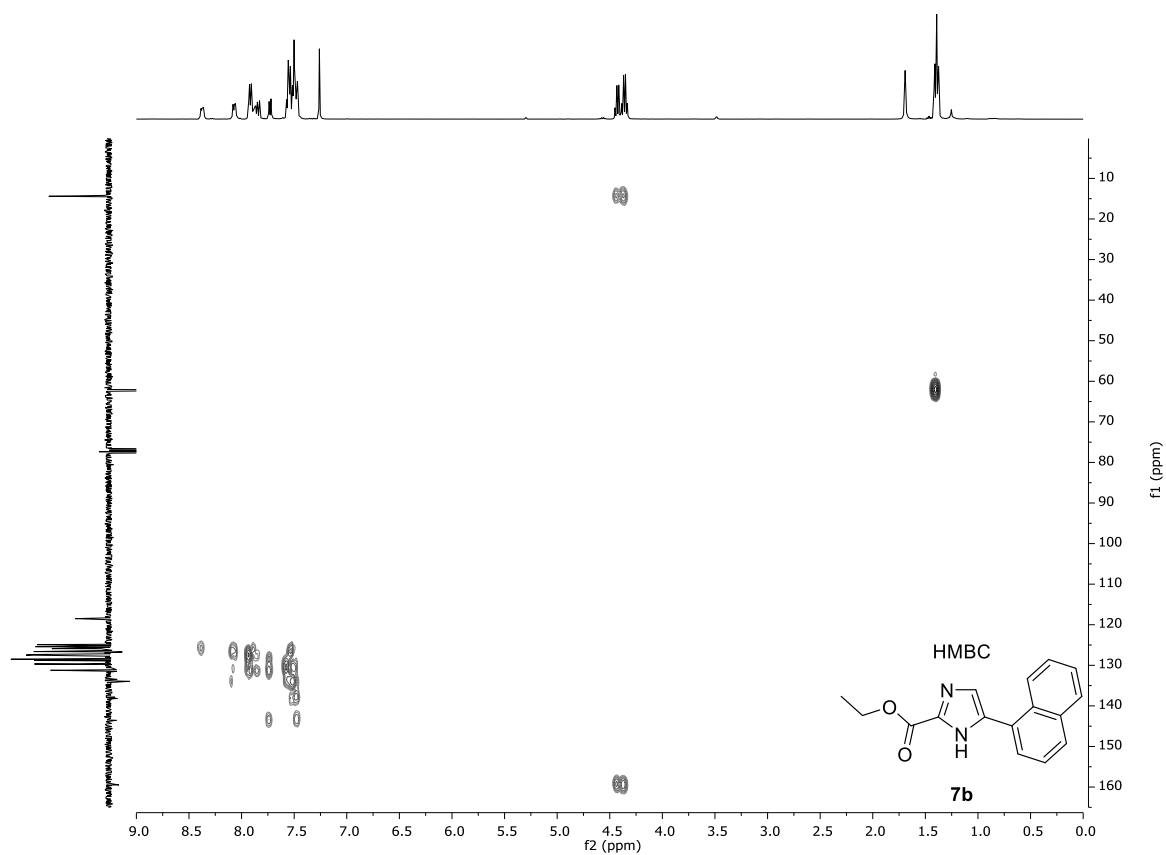

# **Ethyl 4(5)-(2-naphthyl)-1*H*-imidazole-2-carboxylate (7c)**

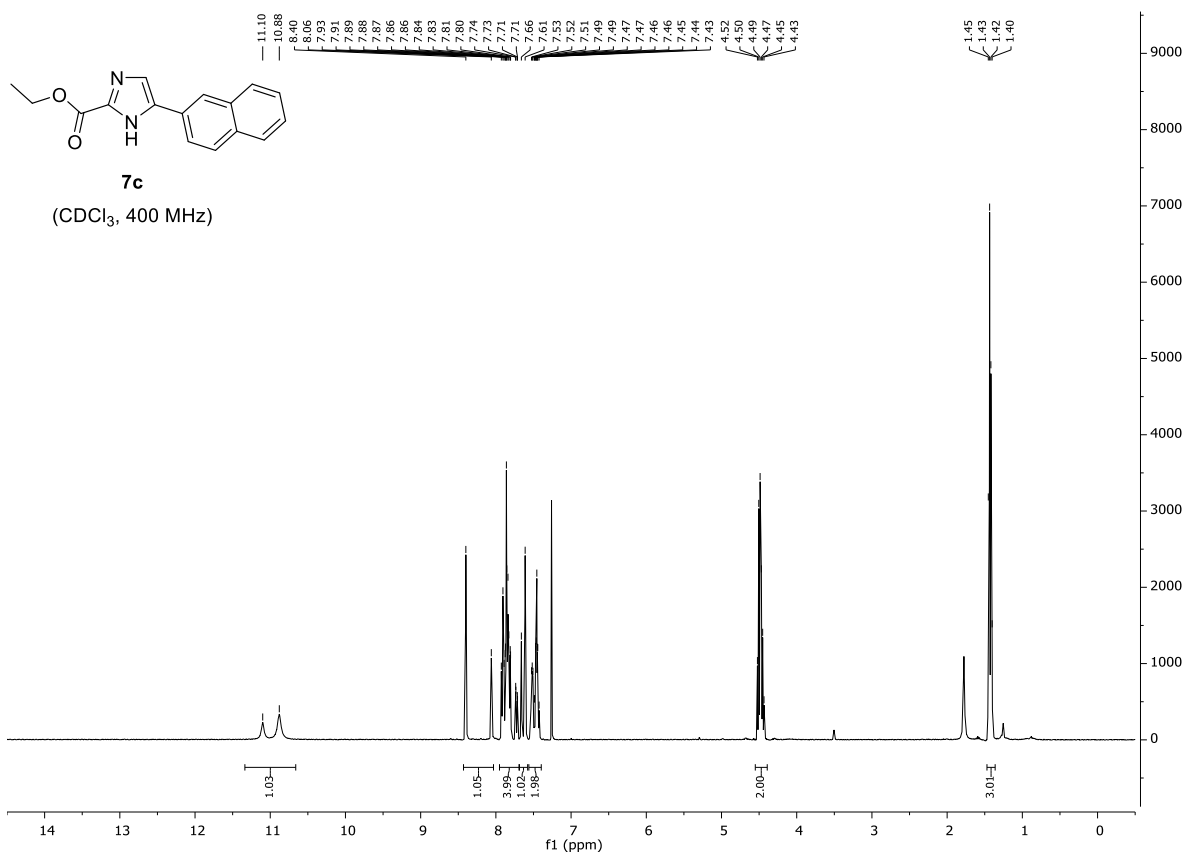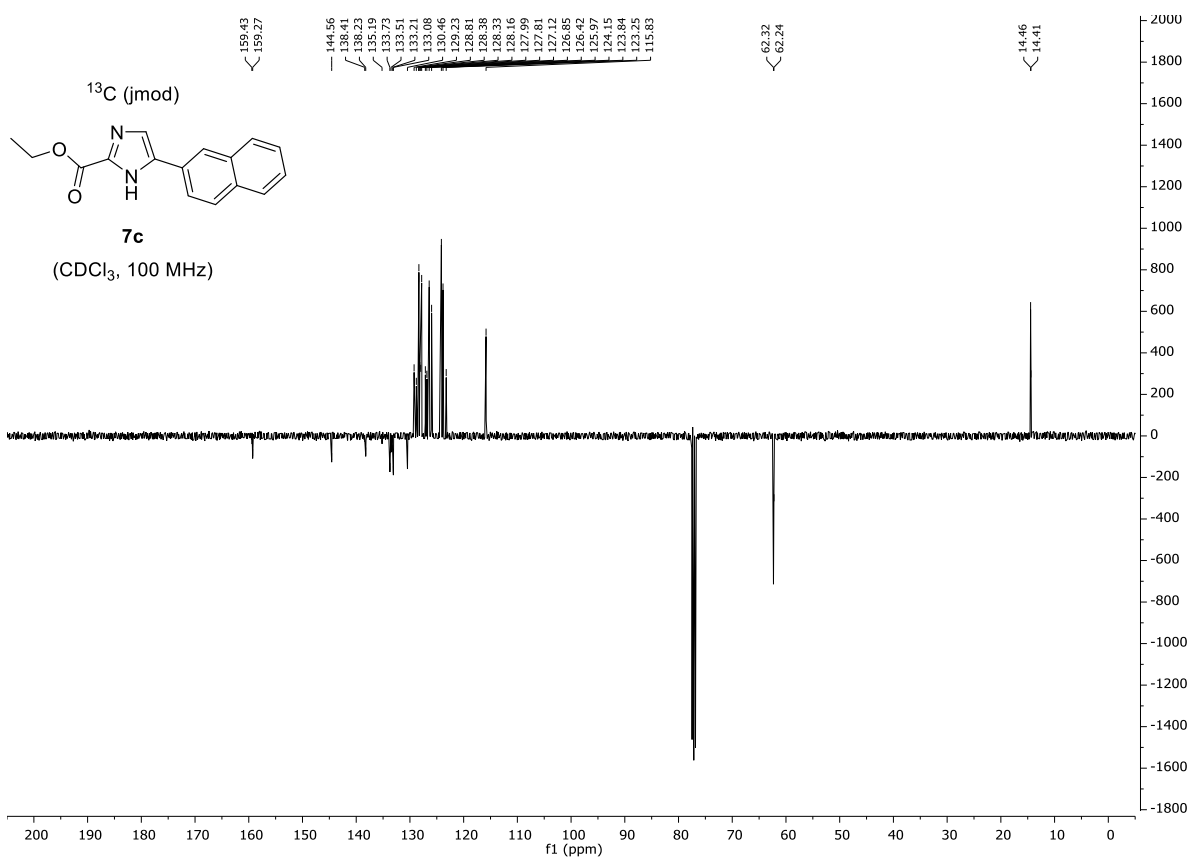

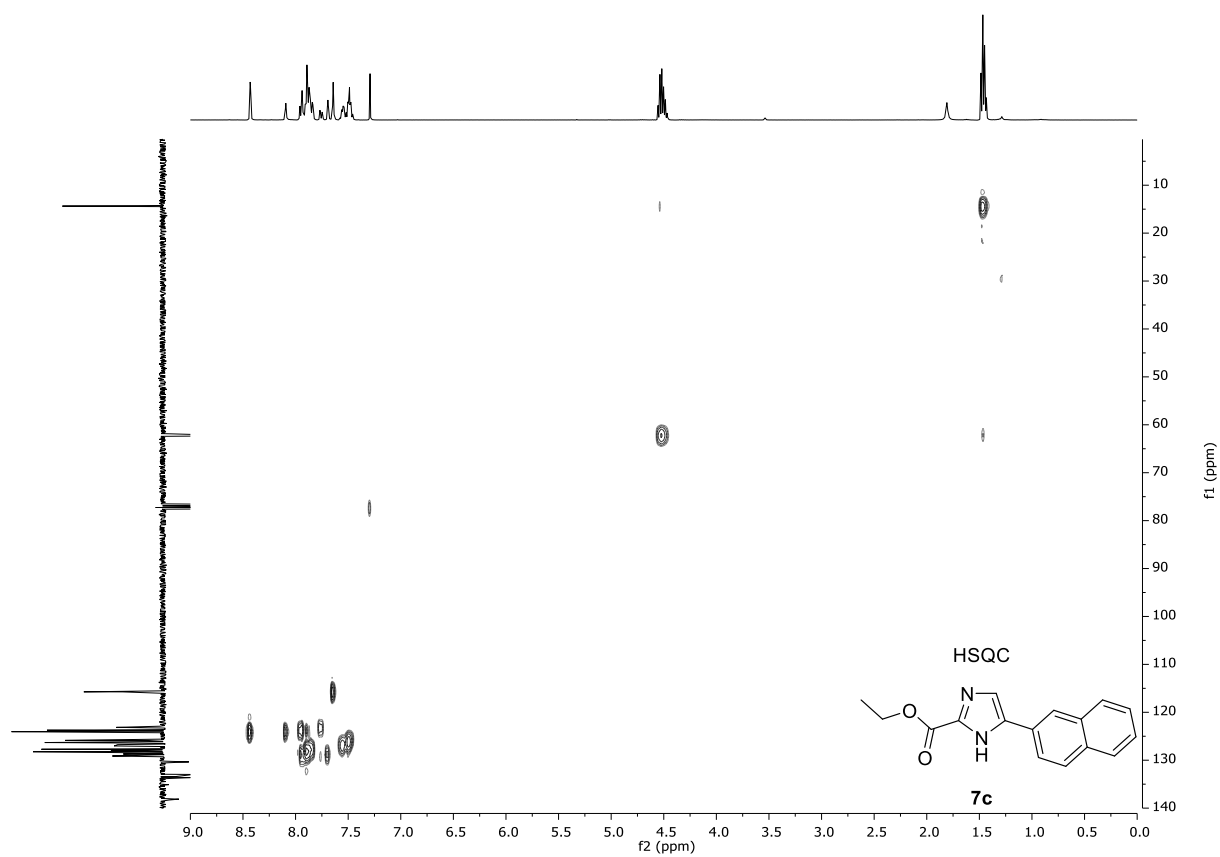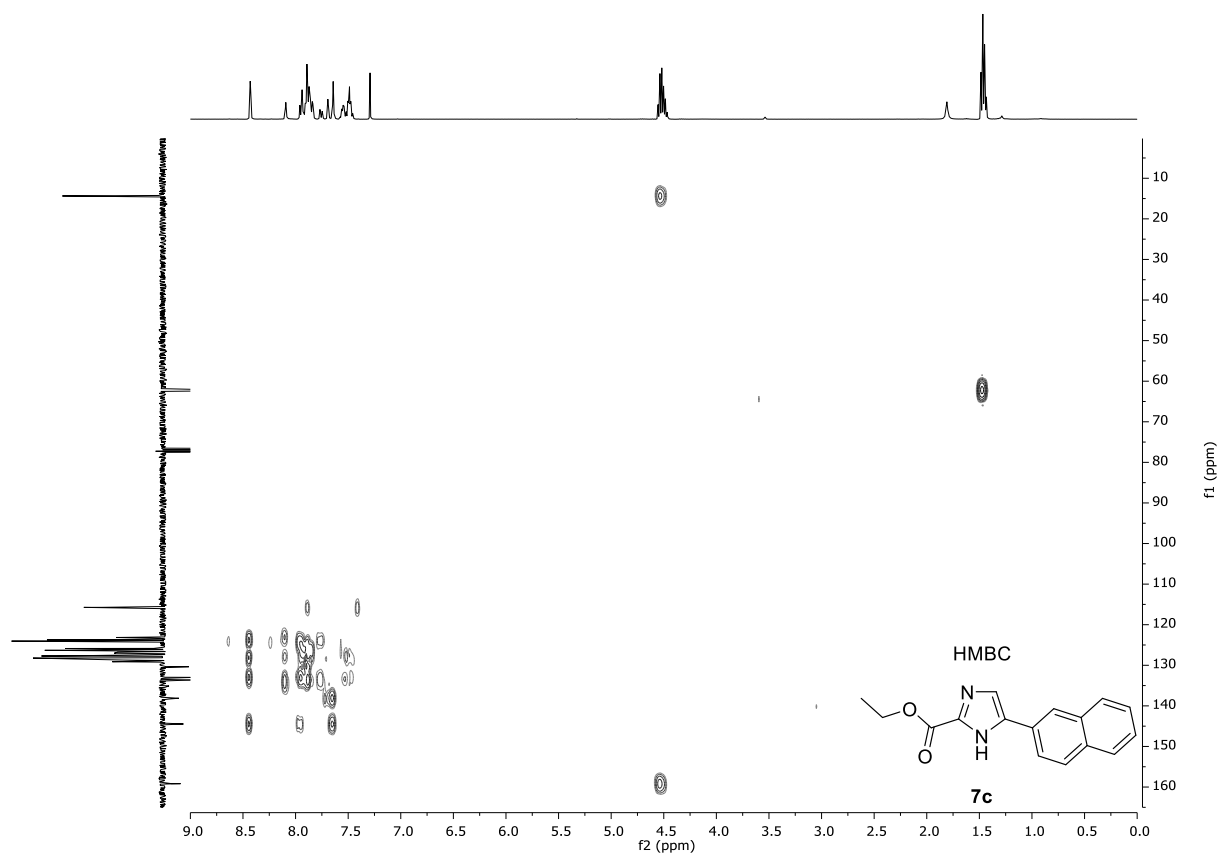

# 4(5)-Phenyl-1*H*-imidazole-2-carboxylic acid (8a)

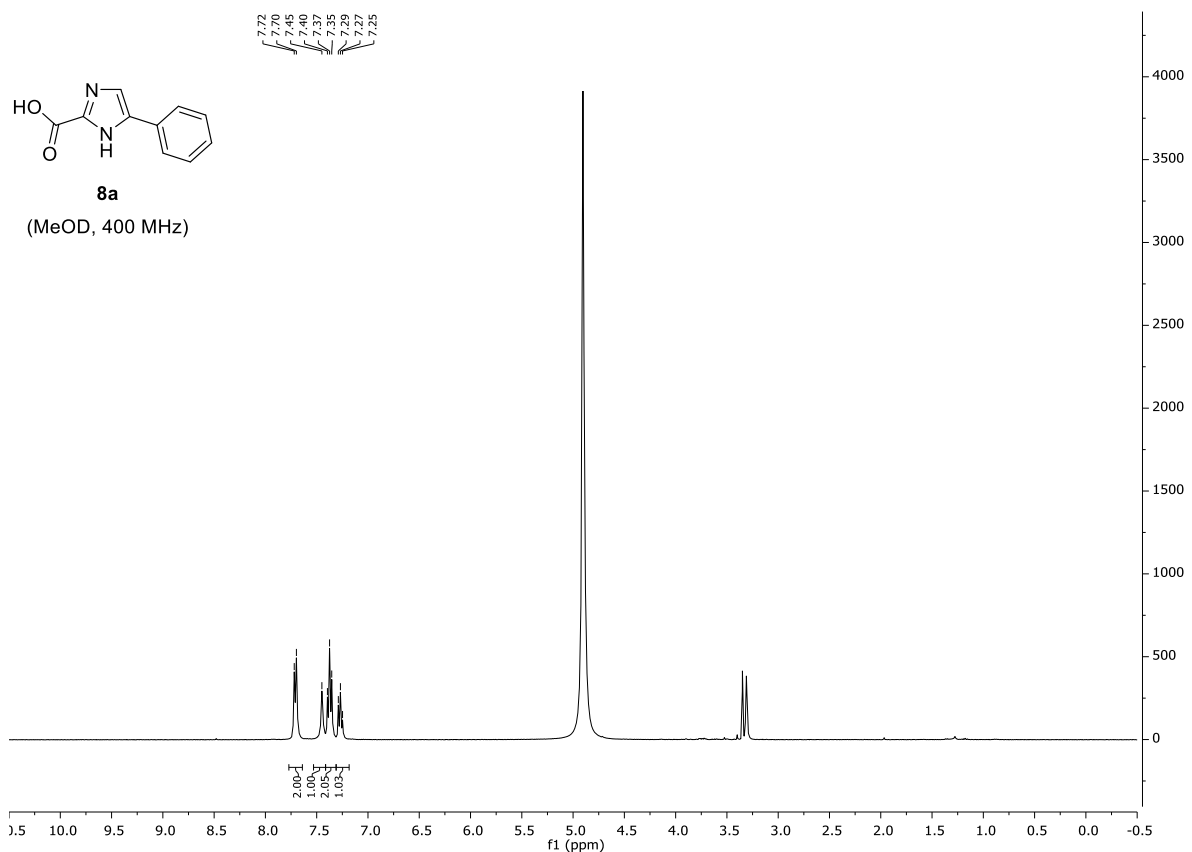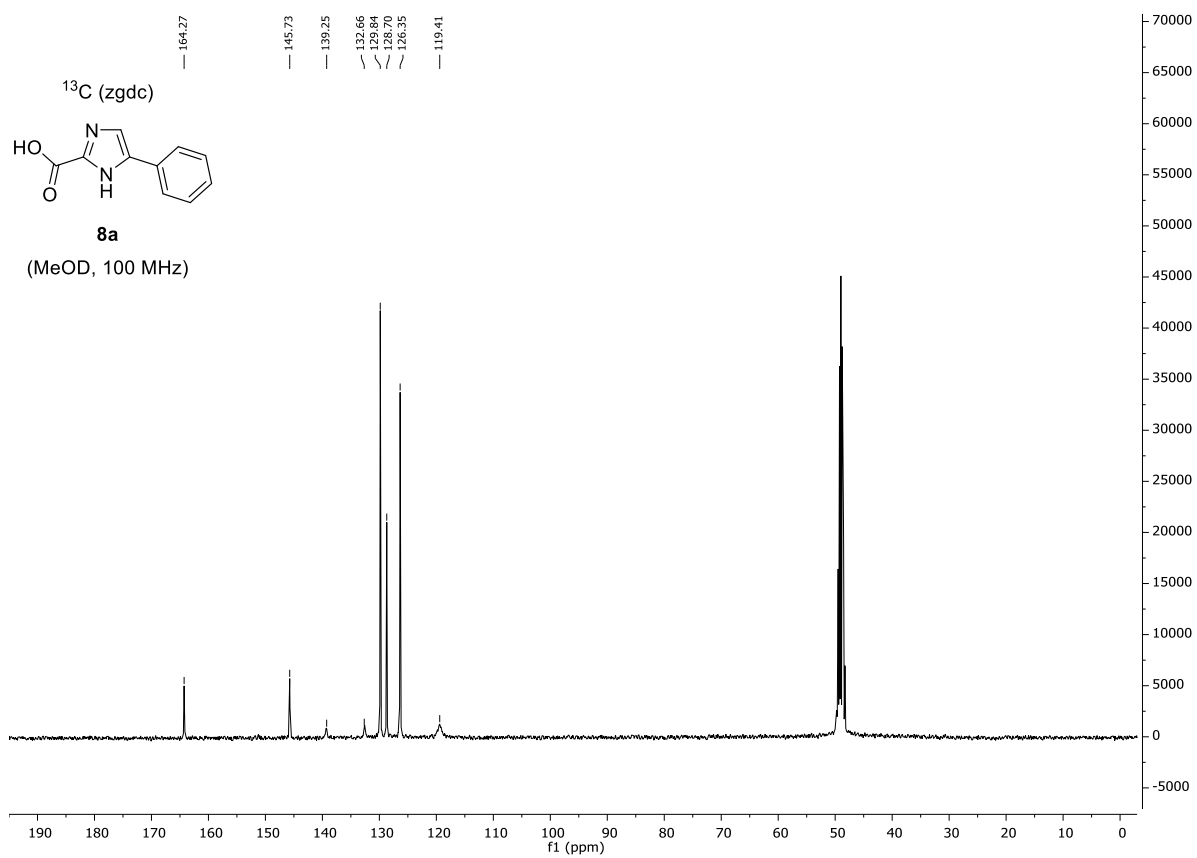



# 4(5)-(1-Naphthyl)-1H-imidazole-2-carboxylic acid (8b)

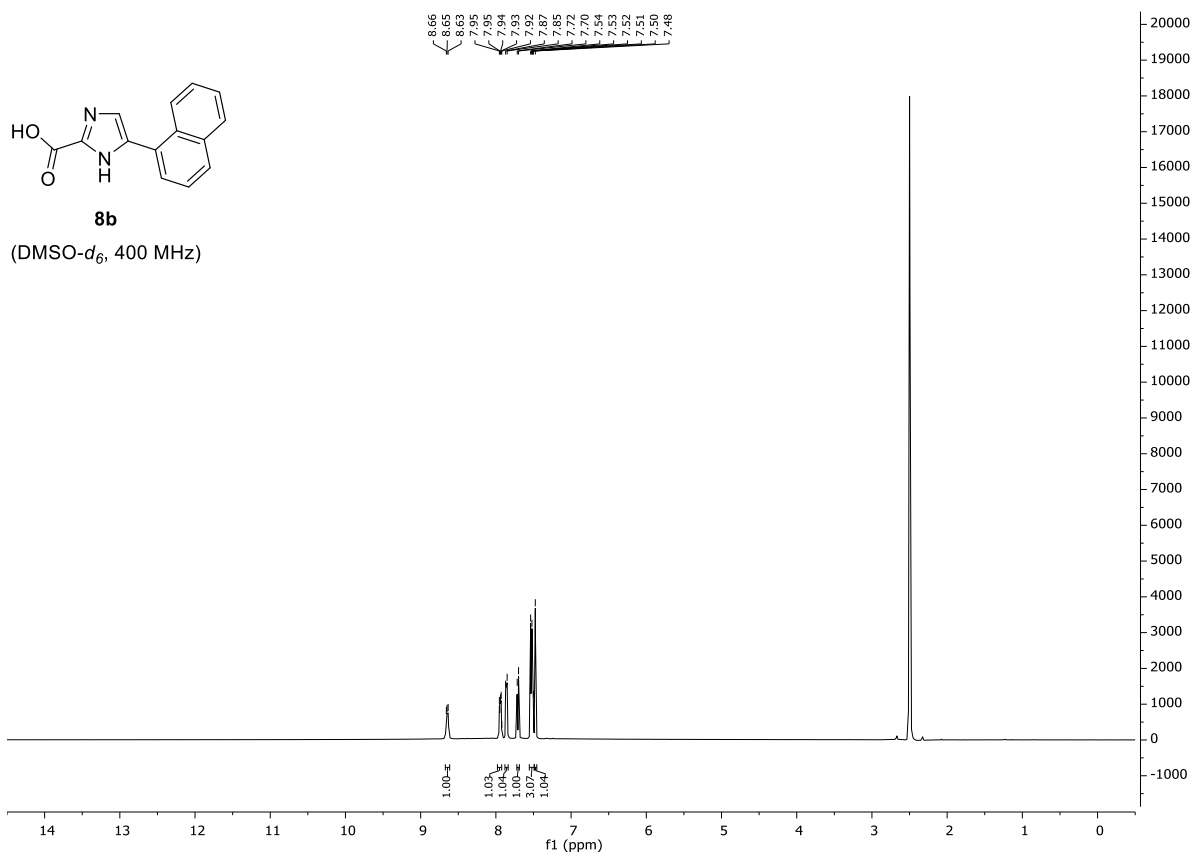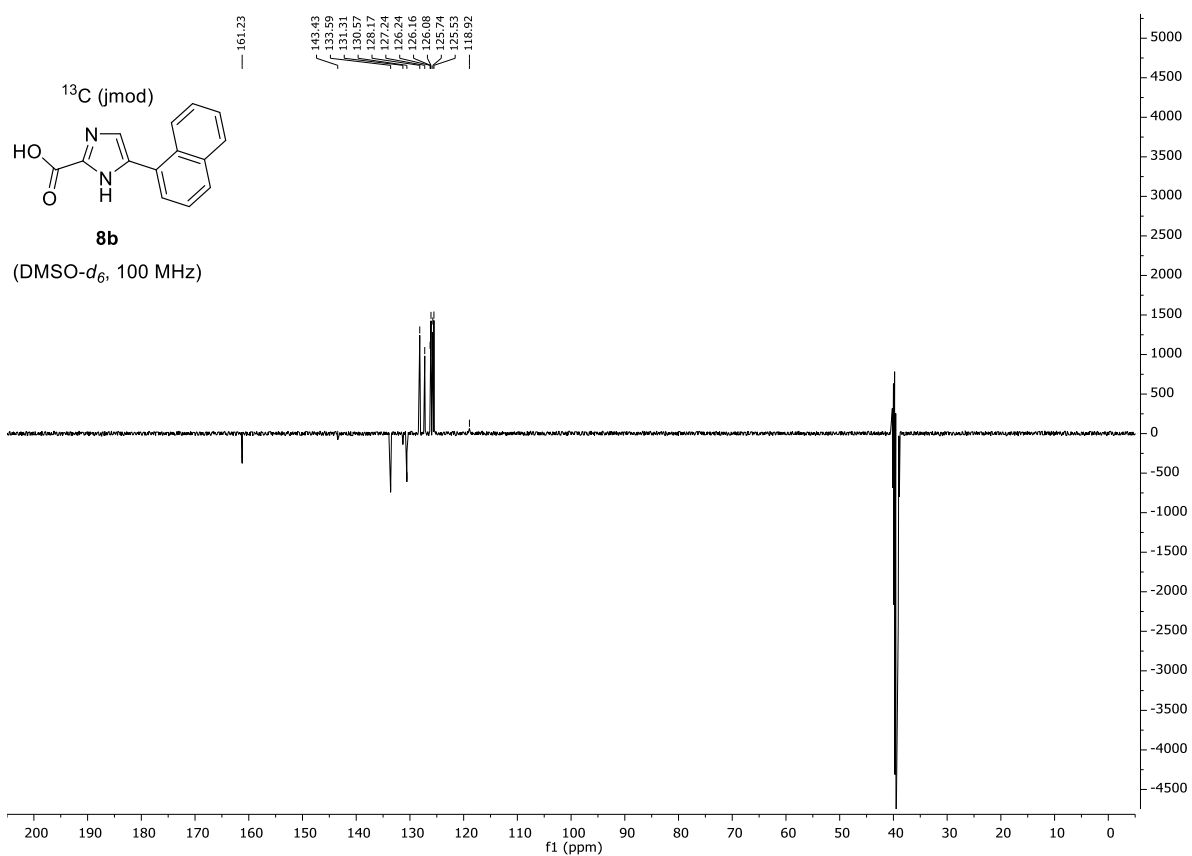

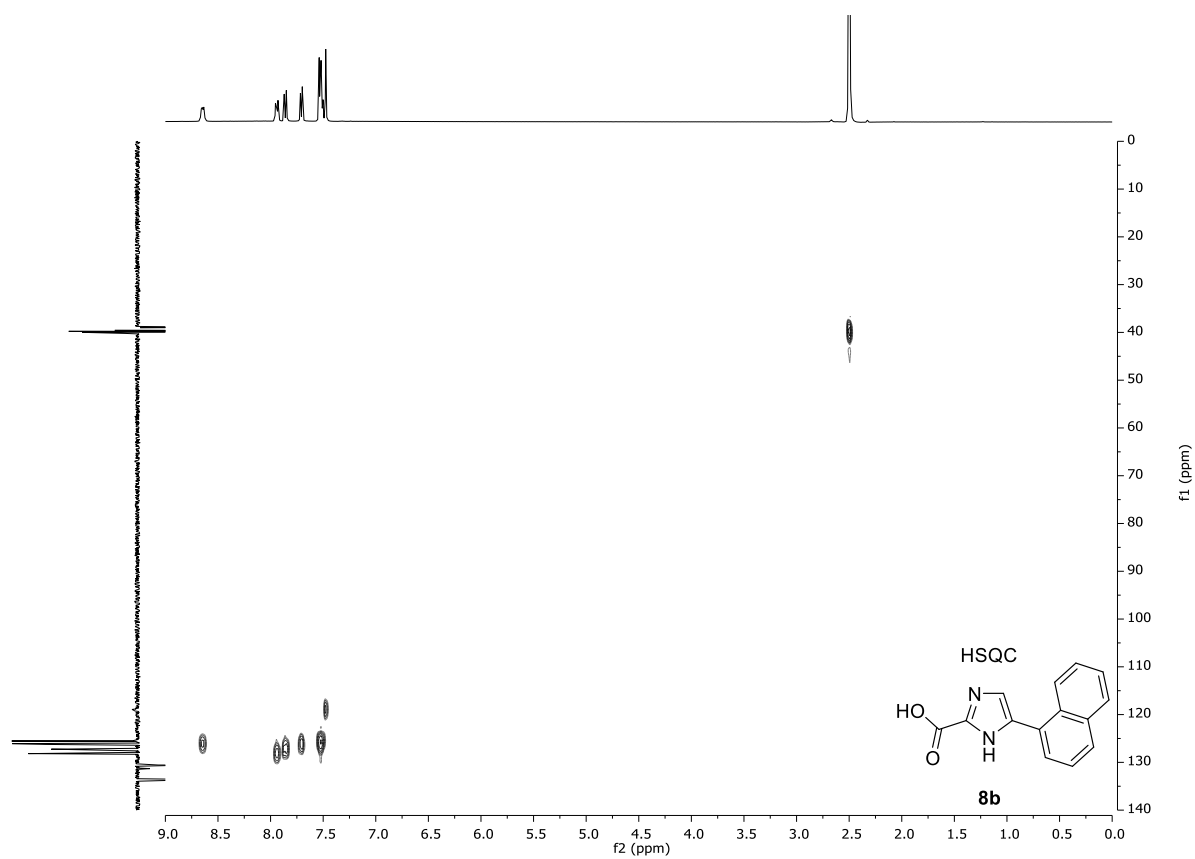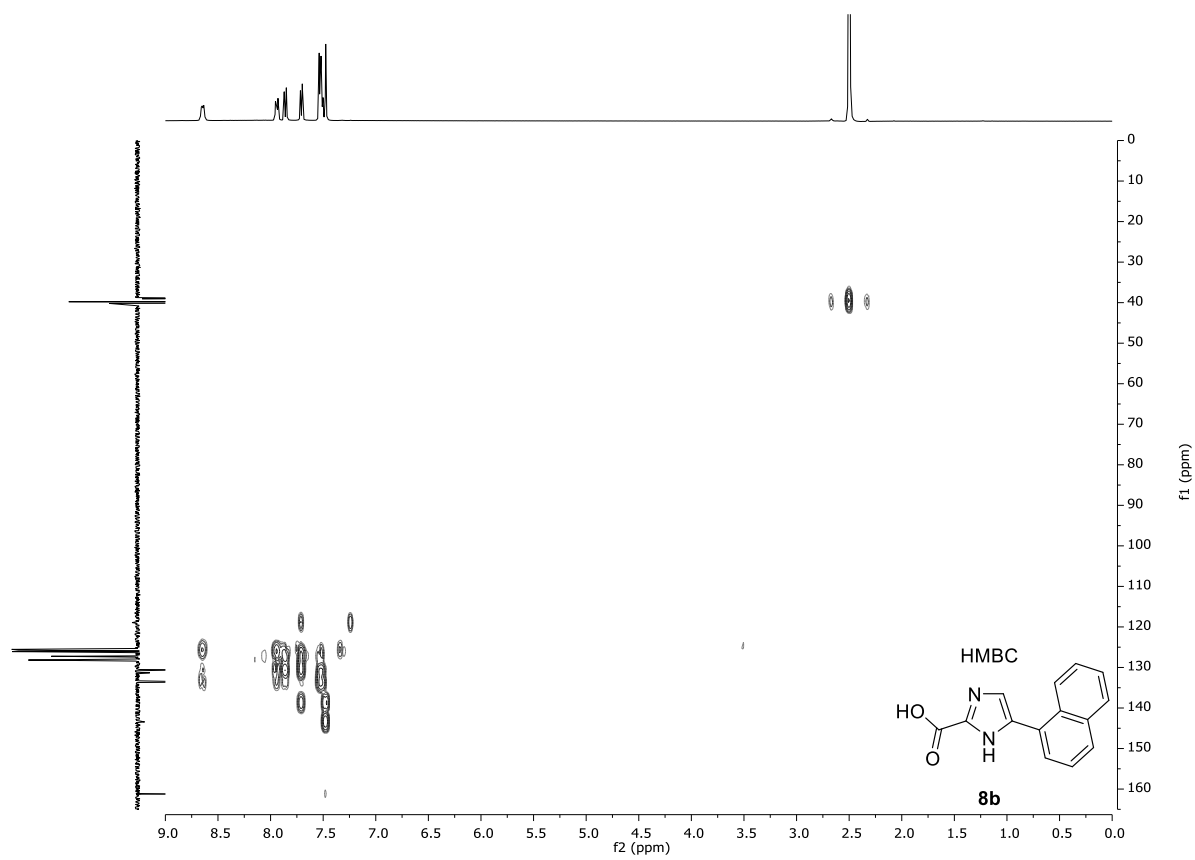

# 4(5)-(2-Naphthyl)-1*H*-imidazole-2-carboxylic acid (**8c**)

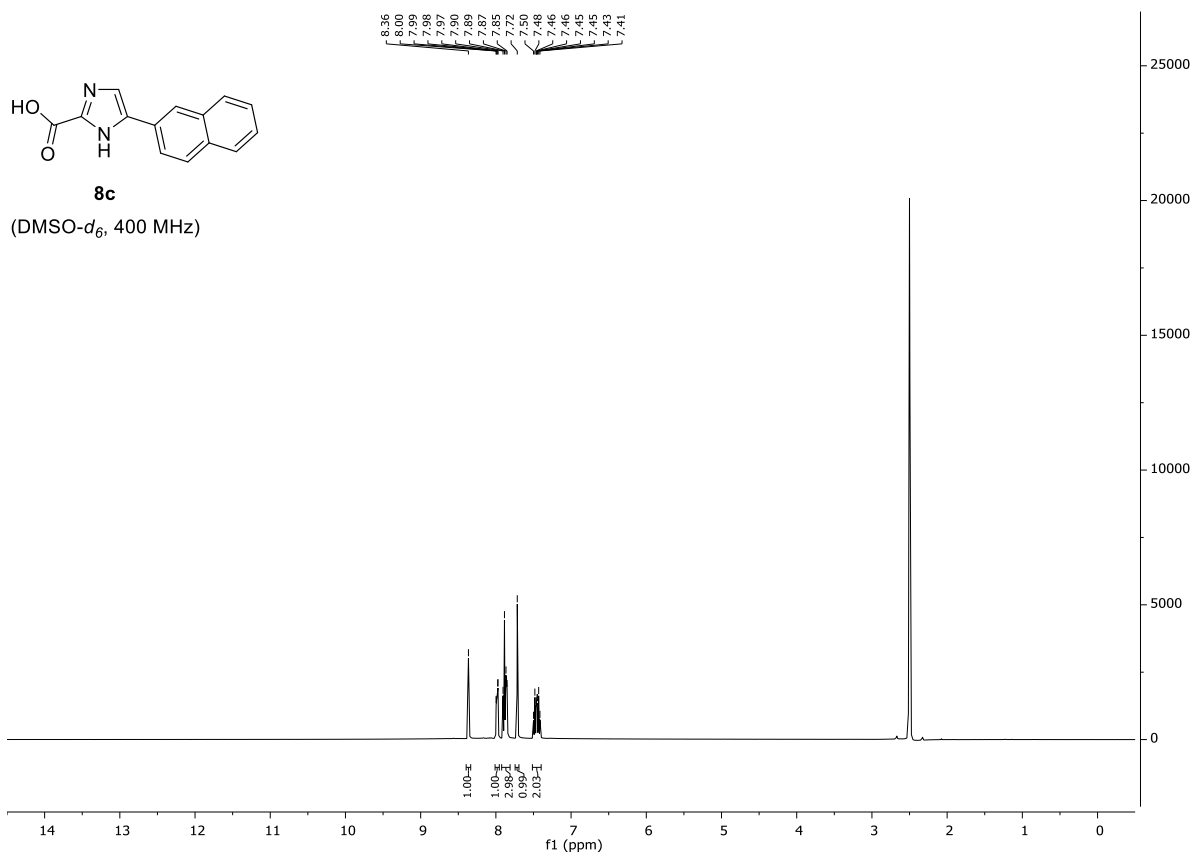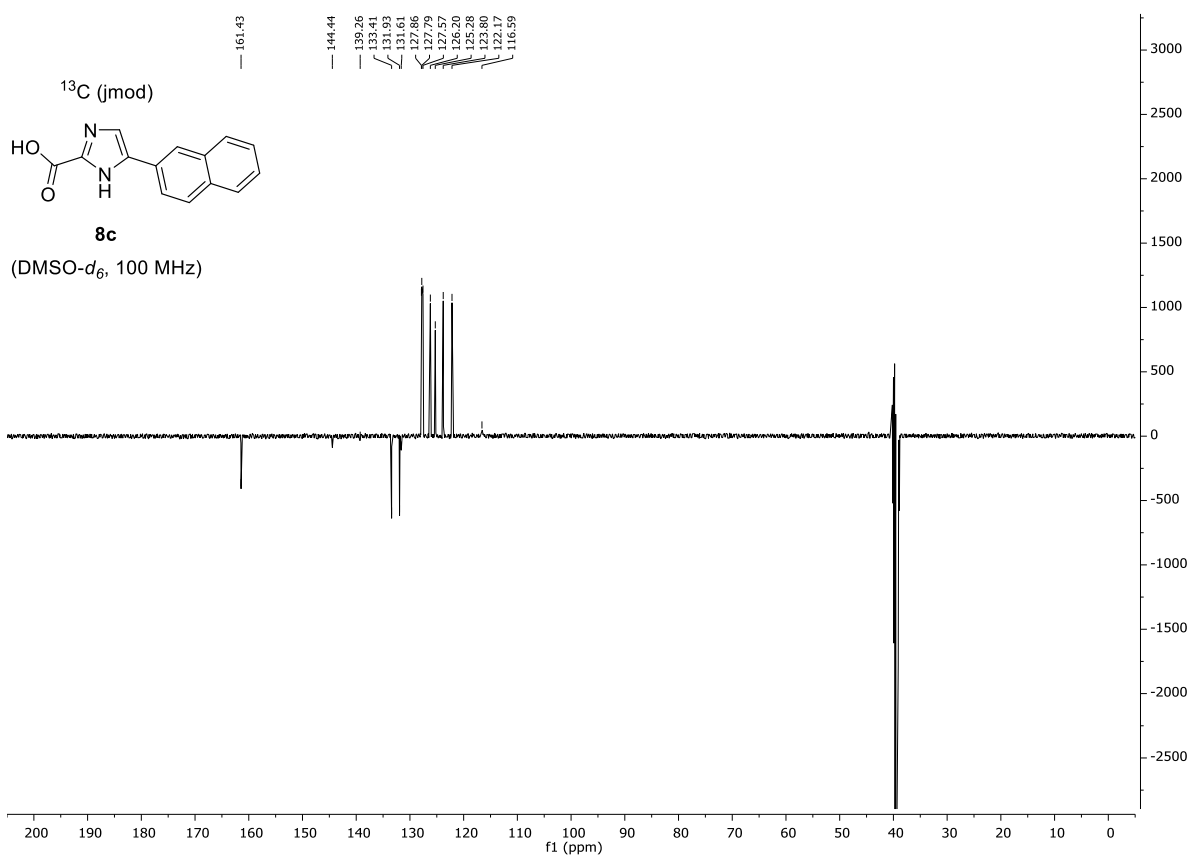

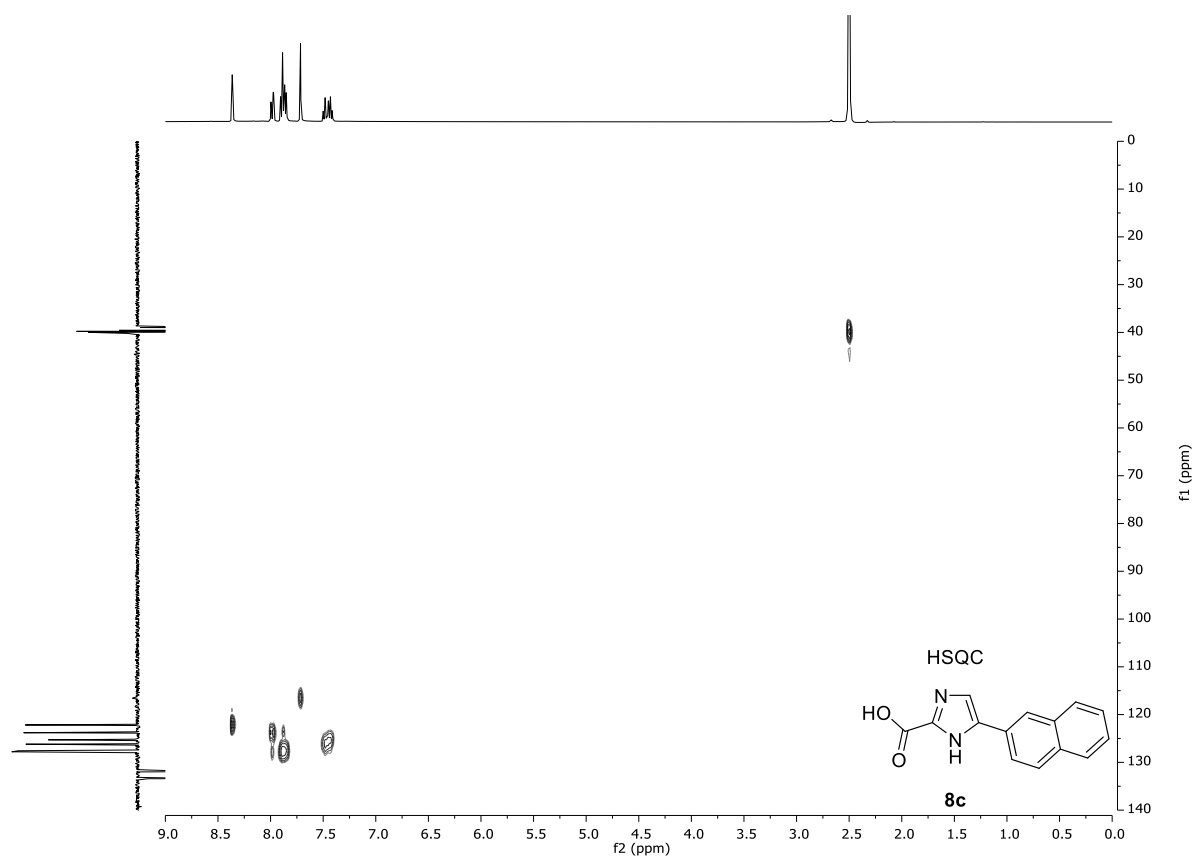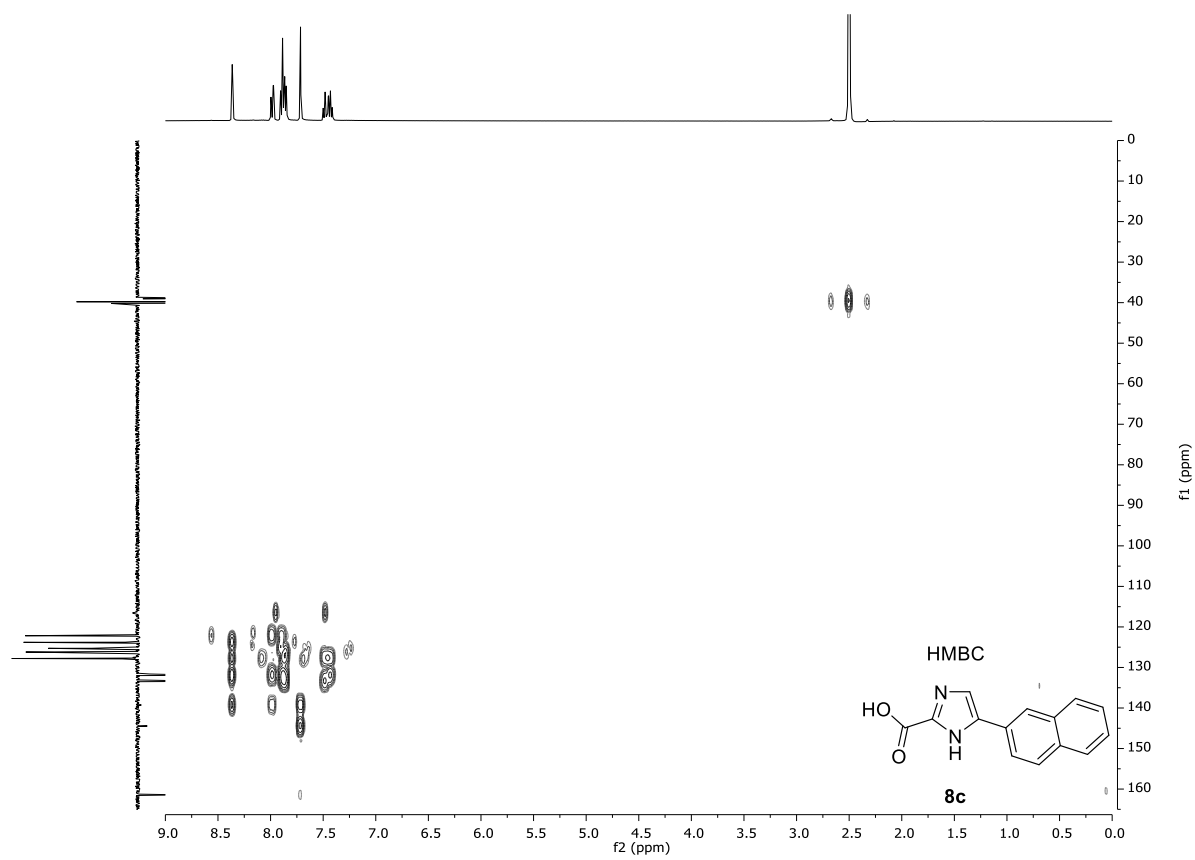

***N*-(2,3,4,6-Tetra-*O*-acetyl- $\beta$ -D-glucopyranosyl)-2-phenyl-1*H*-imidazole-4(5)-carboxamide (10a)**

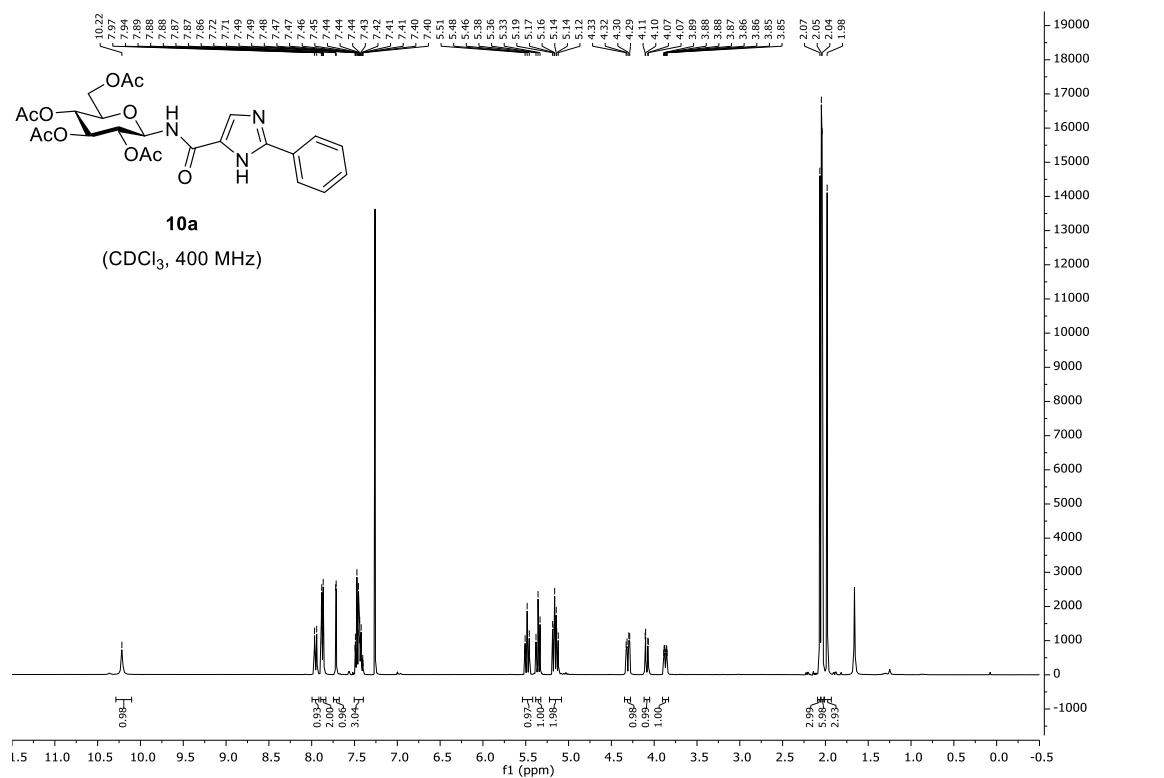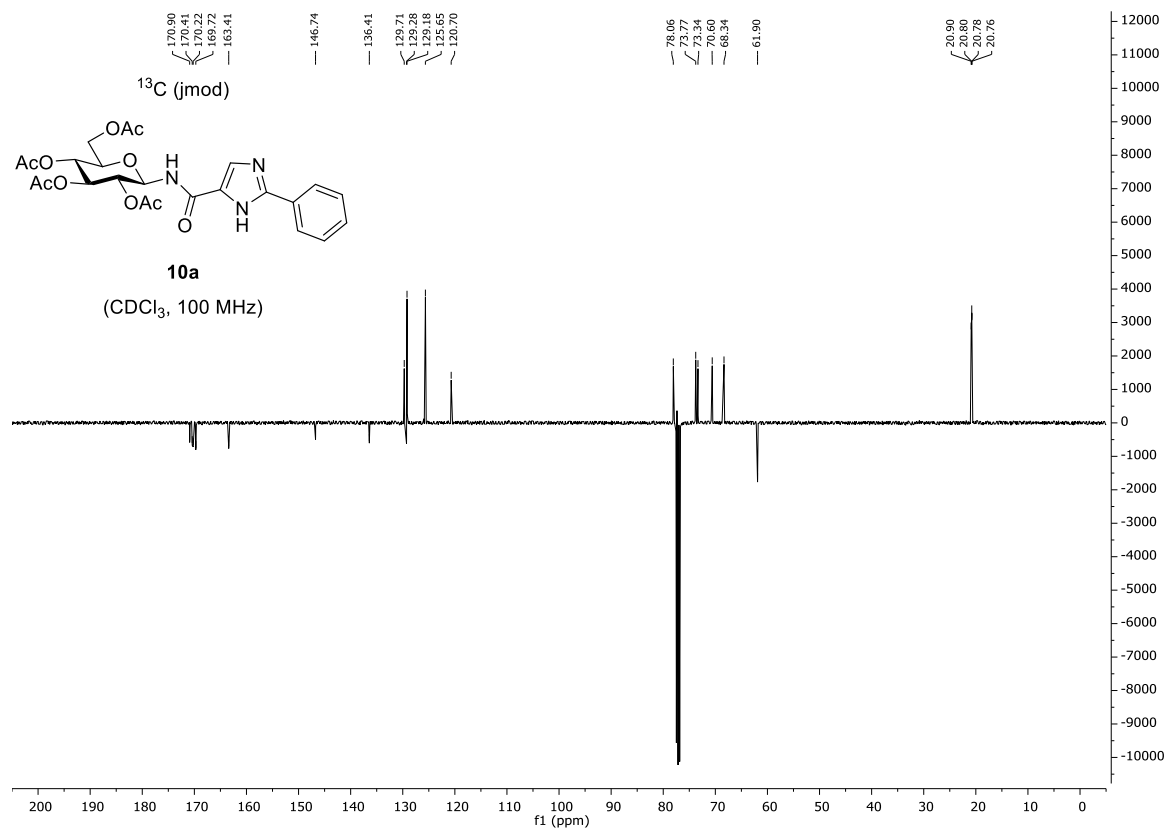

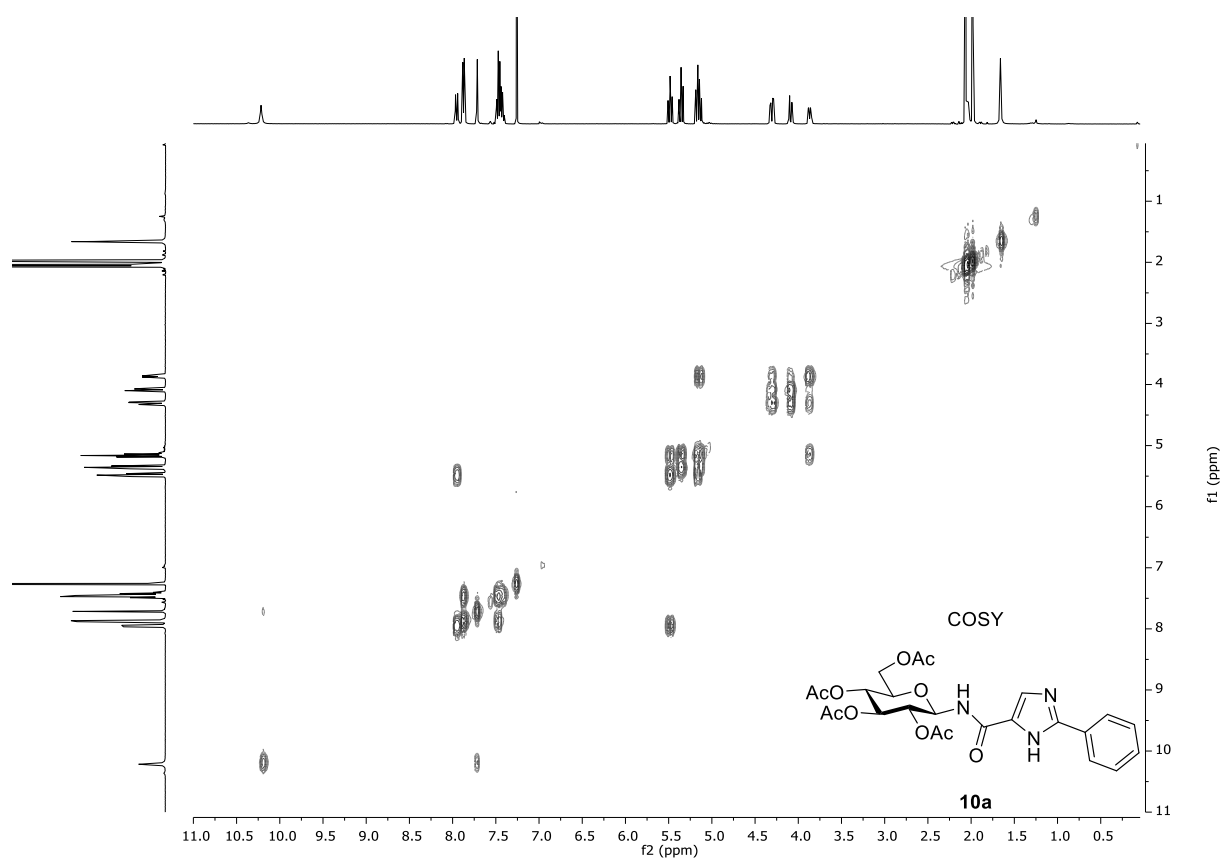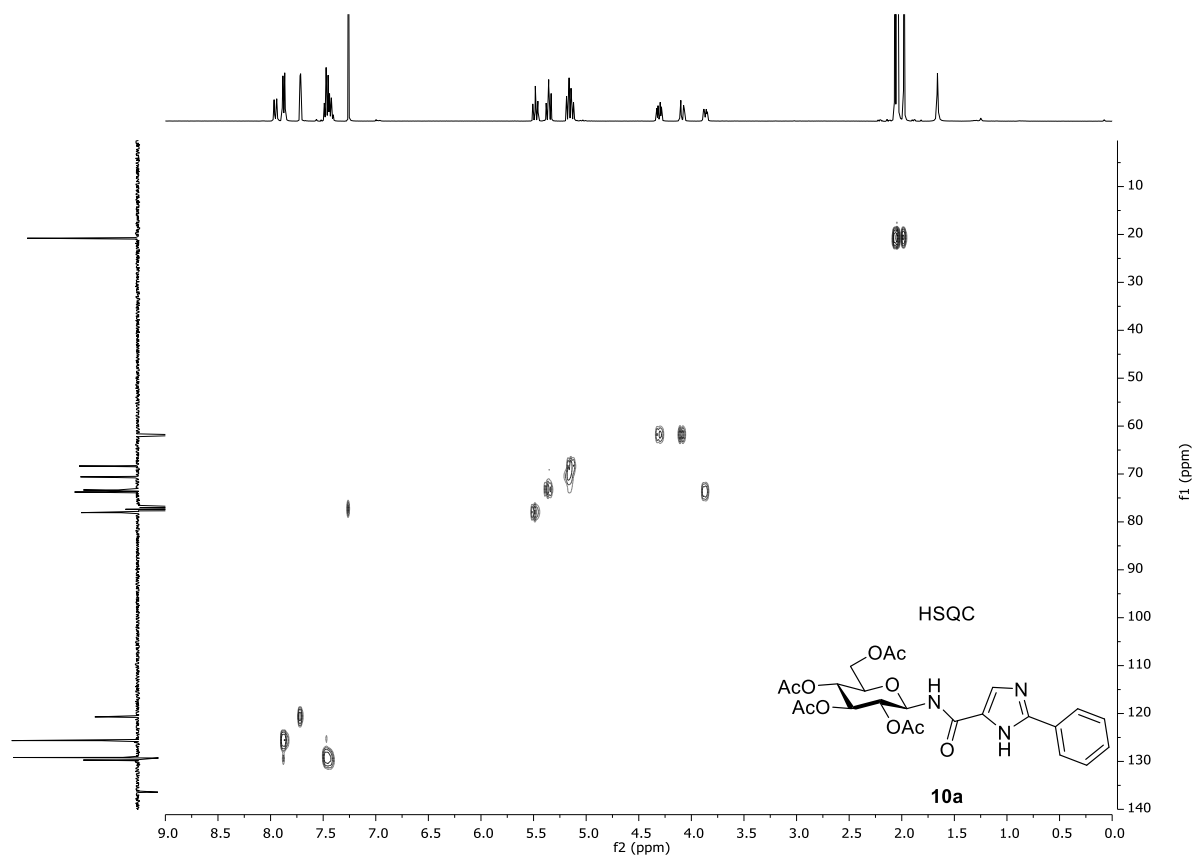

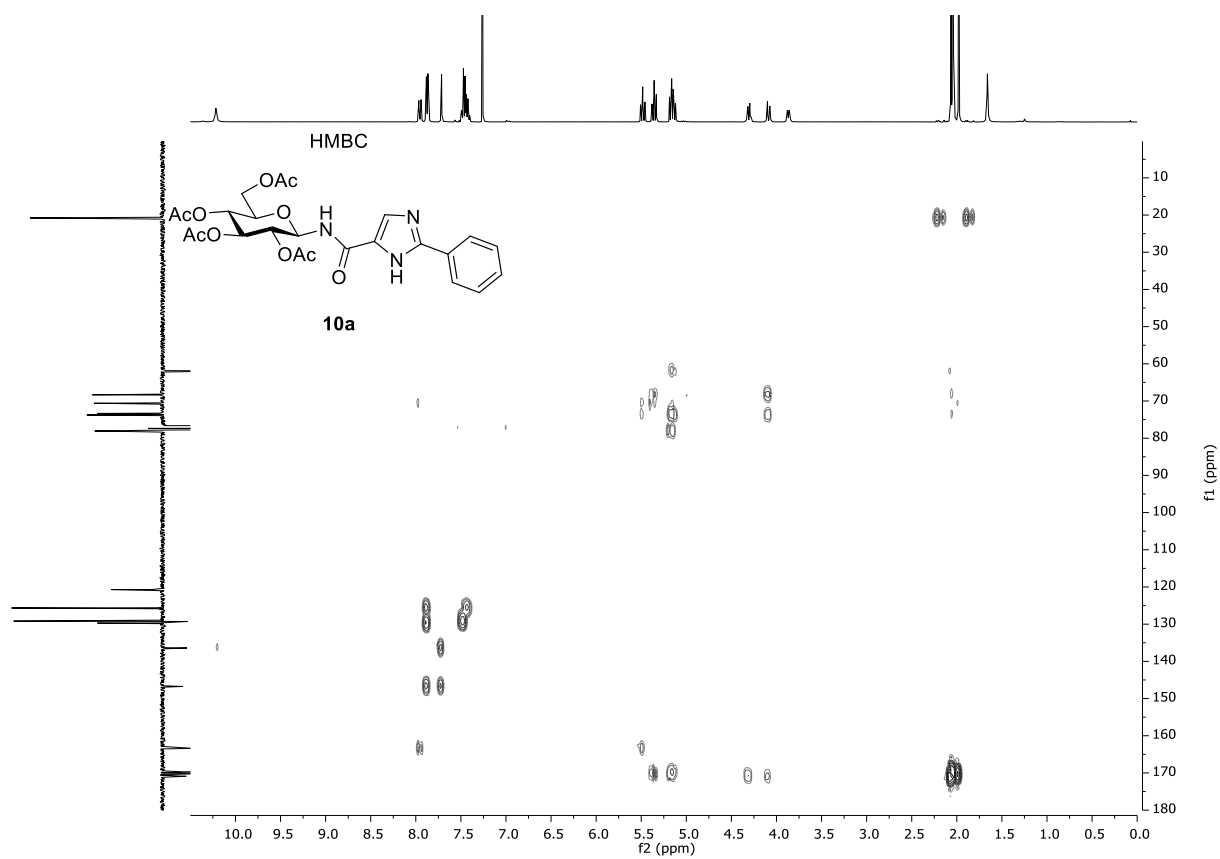

***N*-(2,3,4,6-Tetra-*O*-acetyl- $\beta$ -D-glucopyranosyl)-2-(1-naphthyl)-1*H*-imidazole-4(5)-carboxamide (10b)**

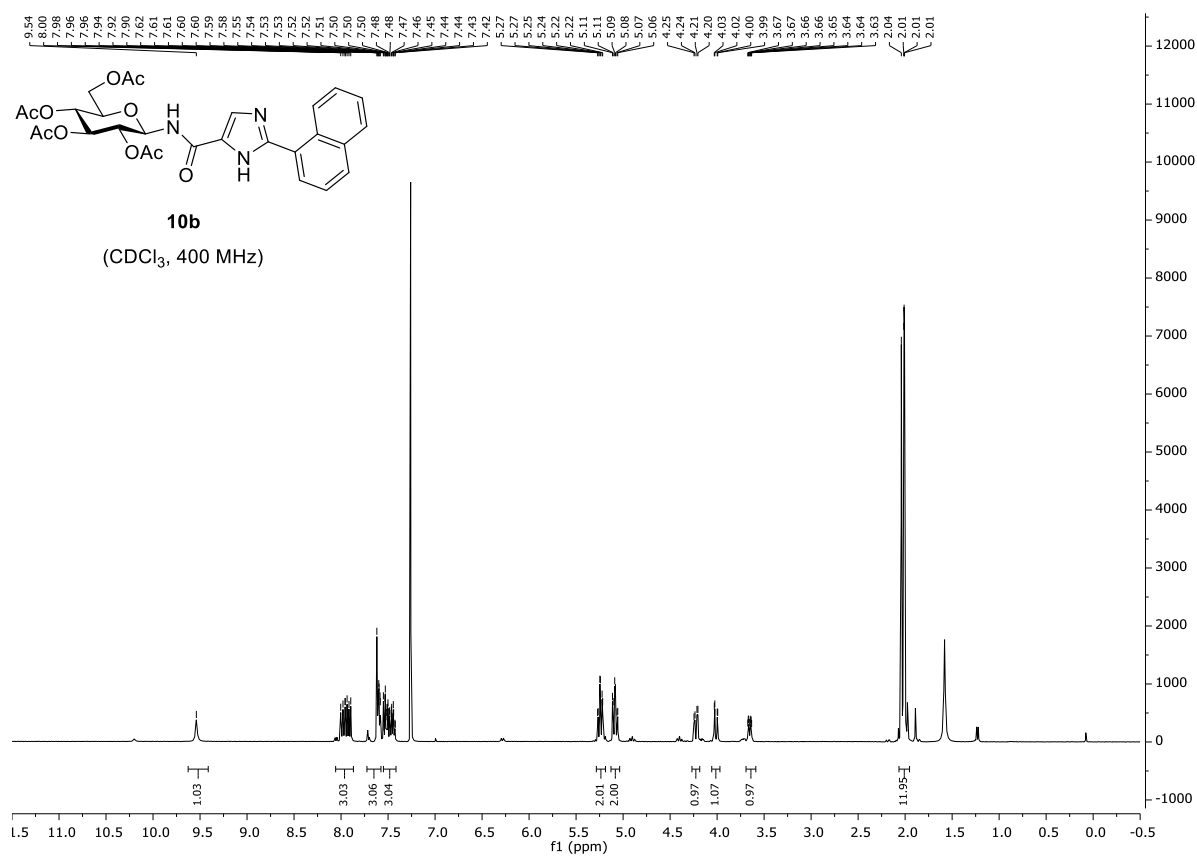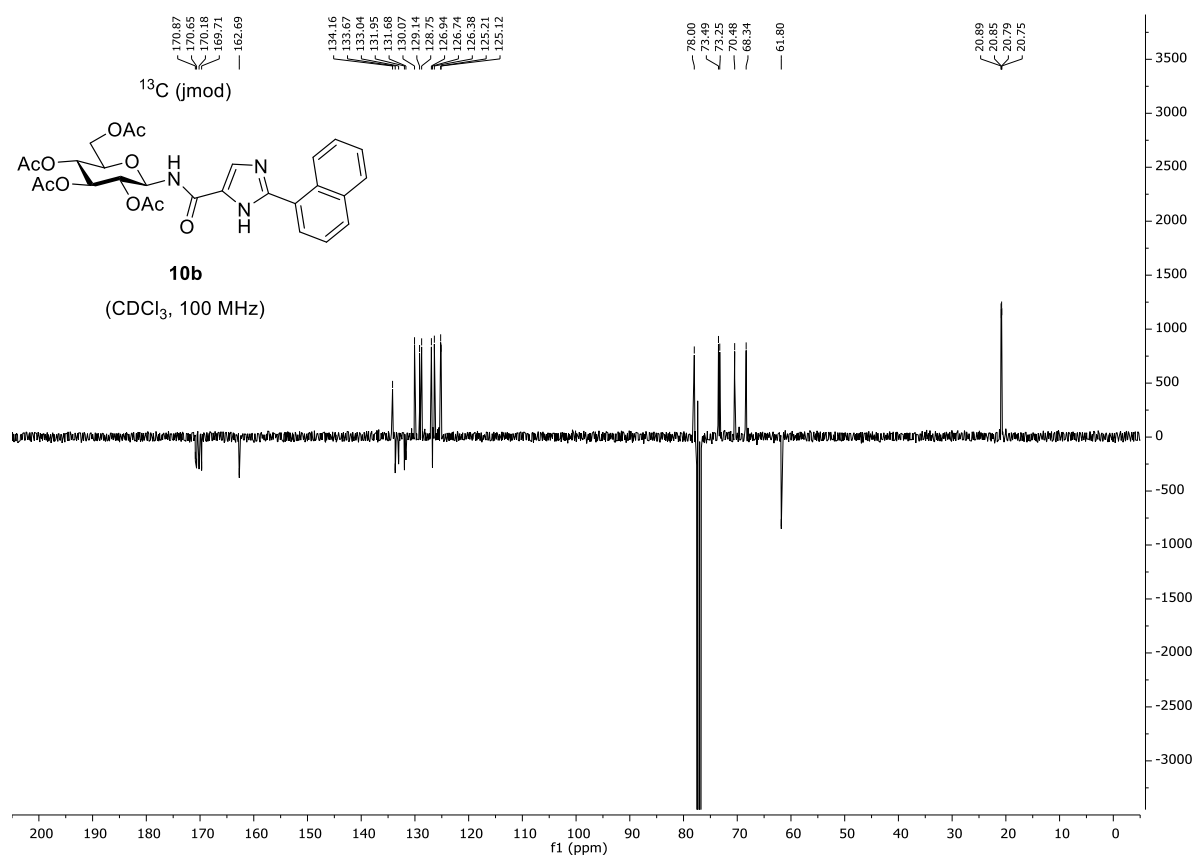



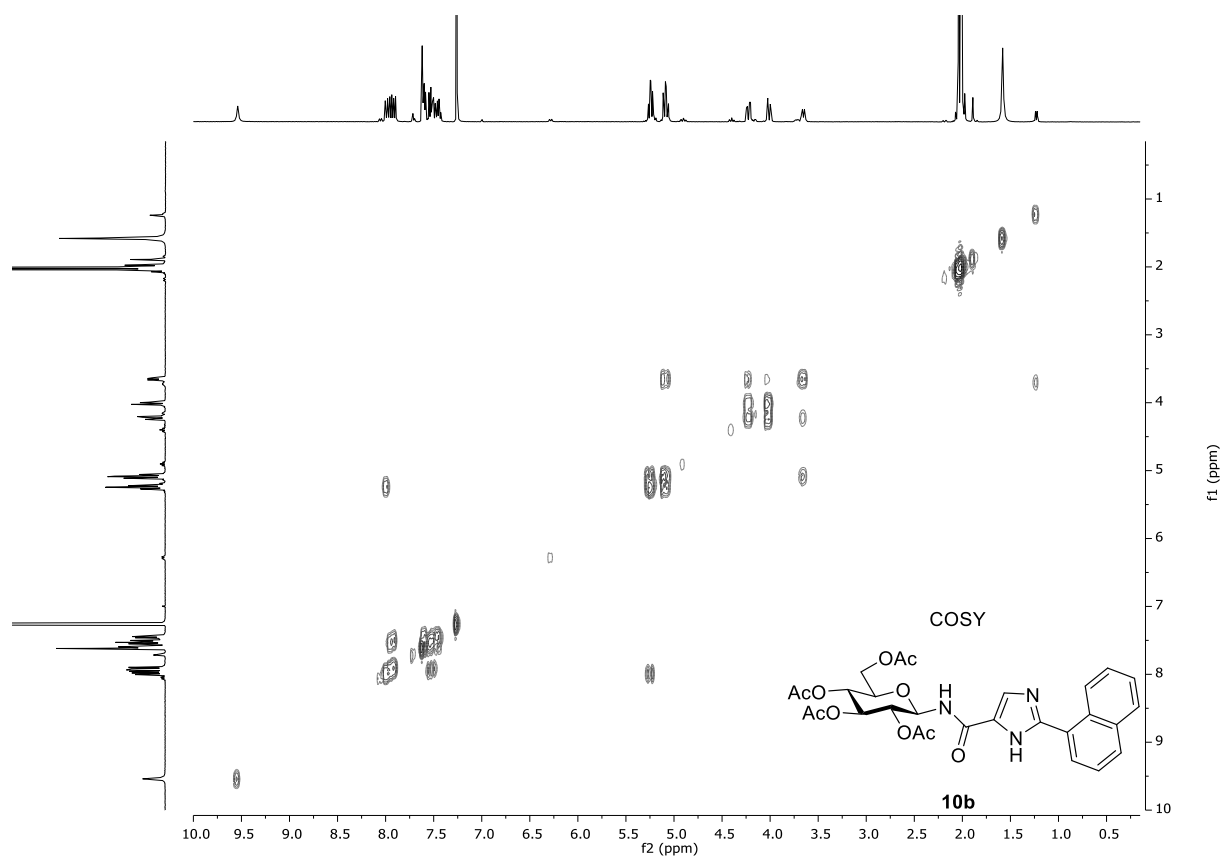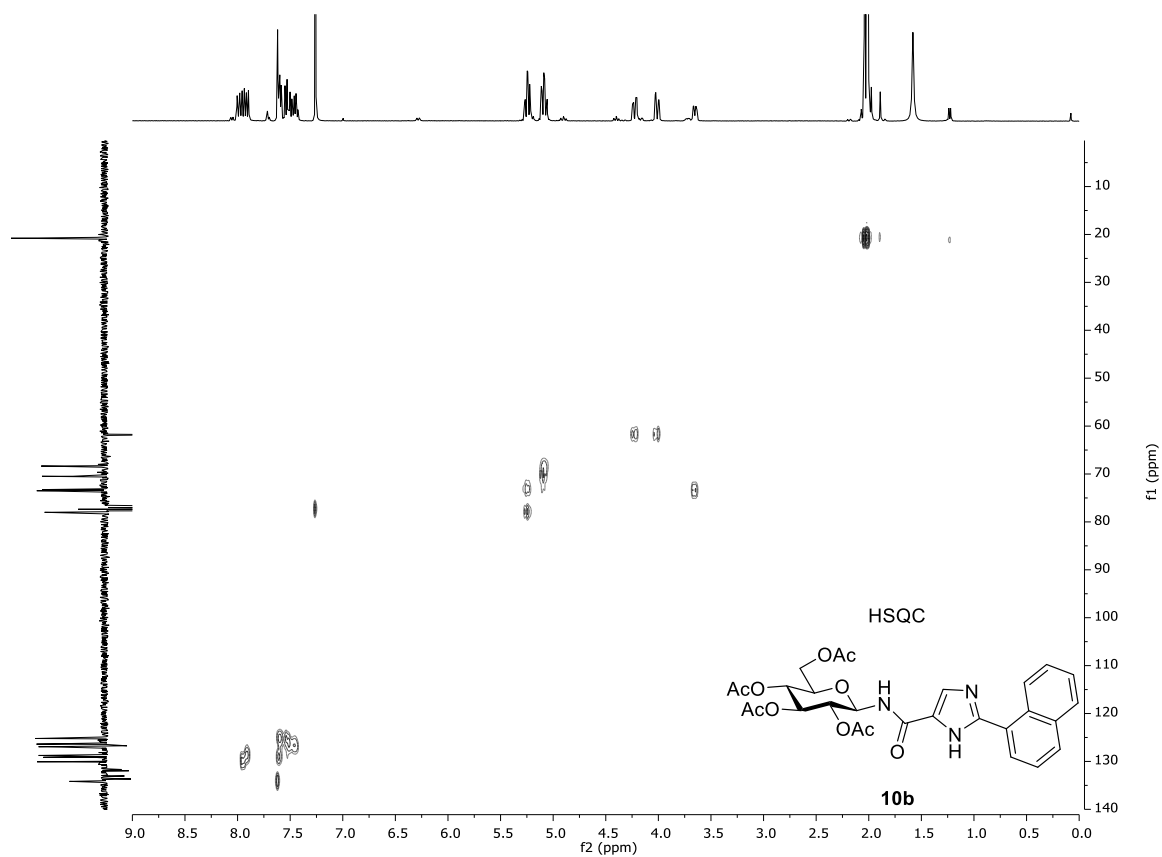

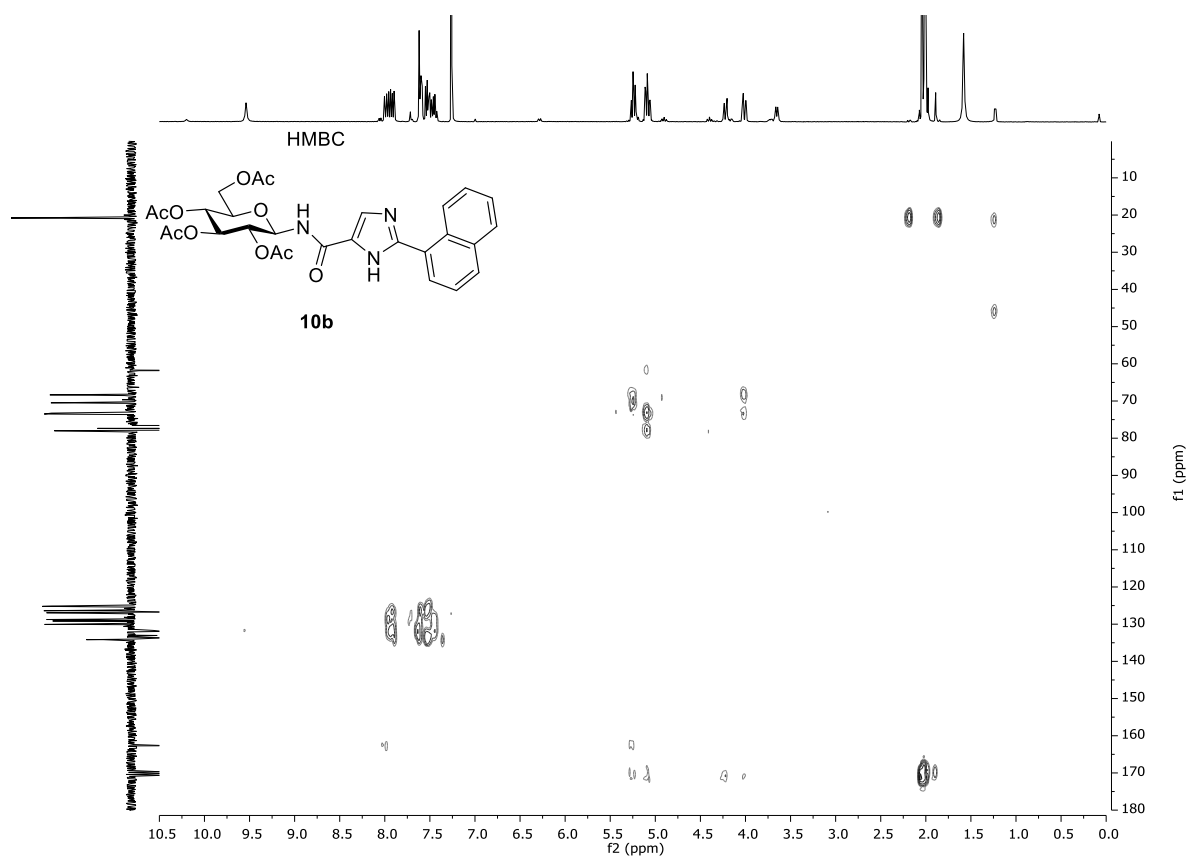

***N*-(2,3,4,6-Tetra-*O*-acetyl- $\beta$ -D-glucopyranosyl)-2-(2-naphthyl)-1*H*-imidazole-4(5)-carboxamide (10c)**

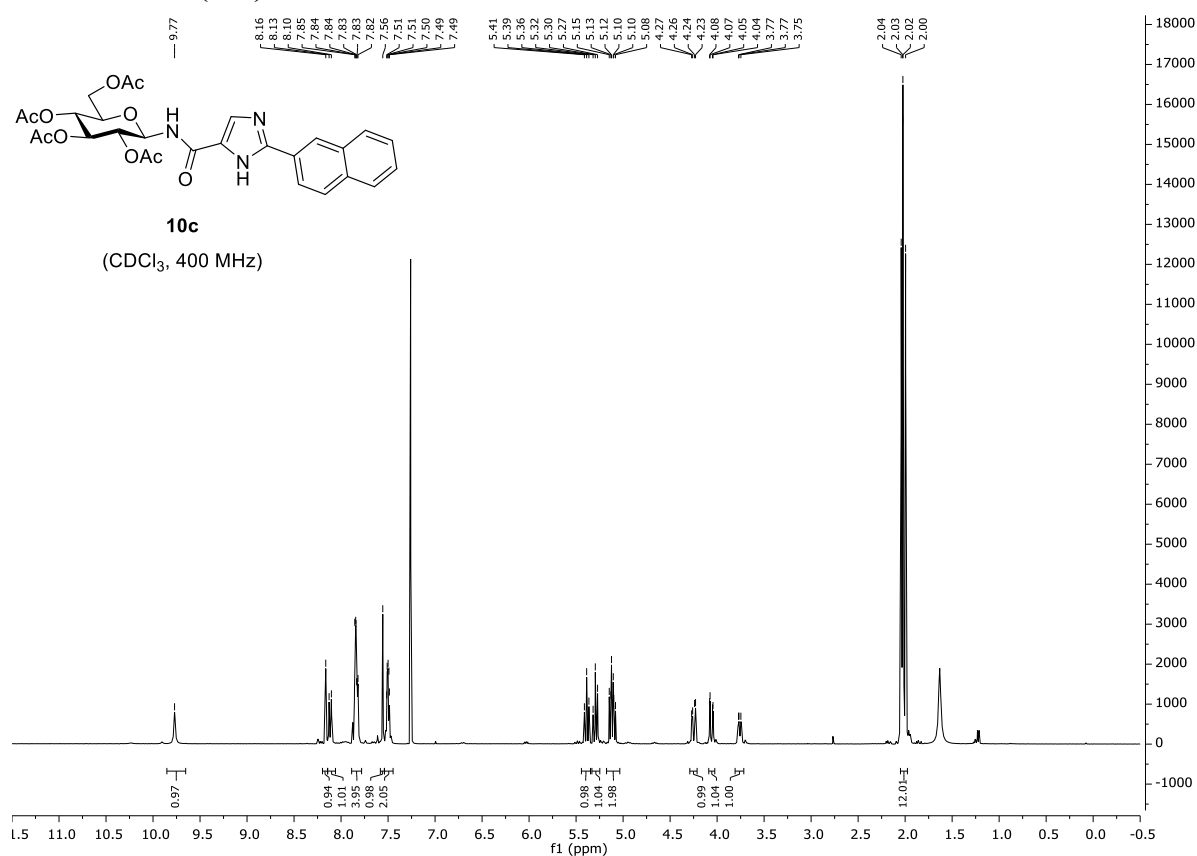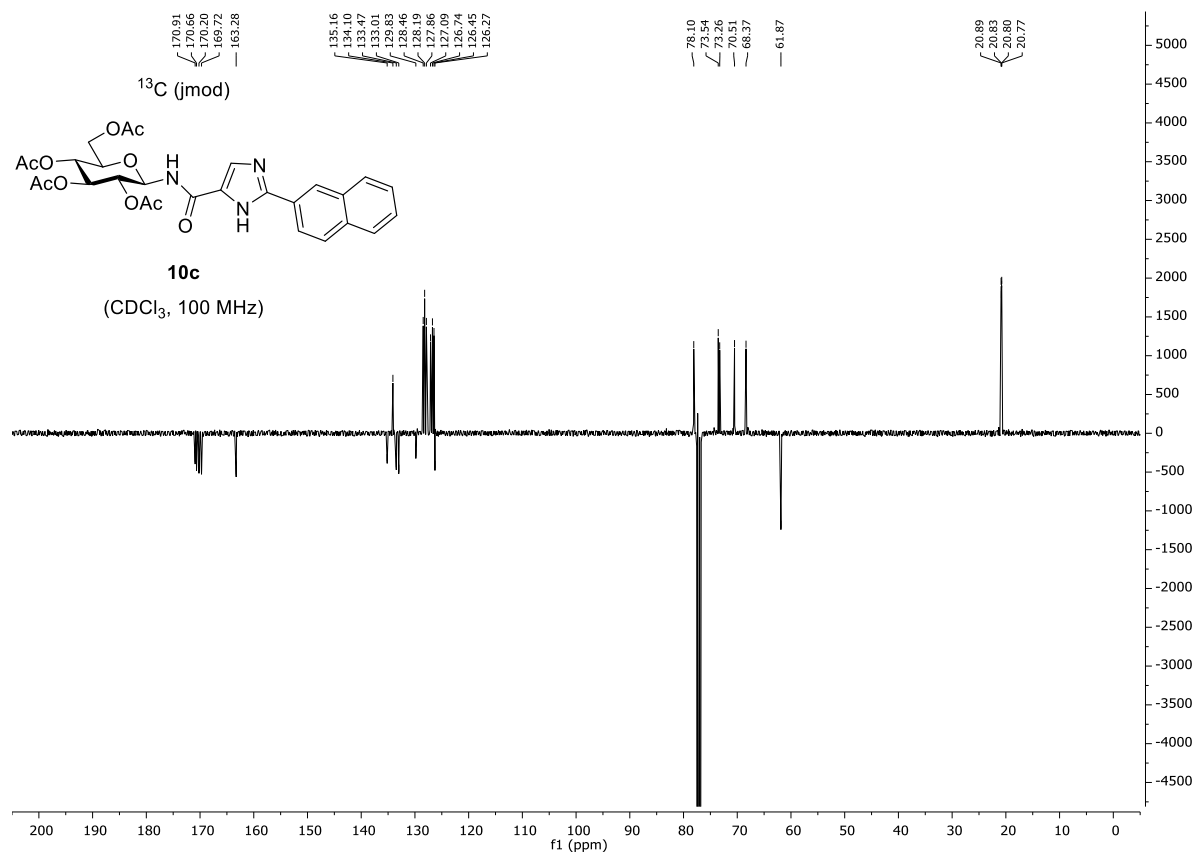

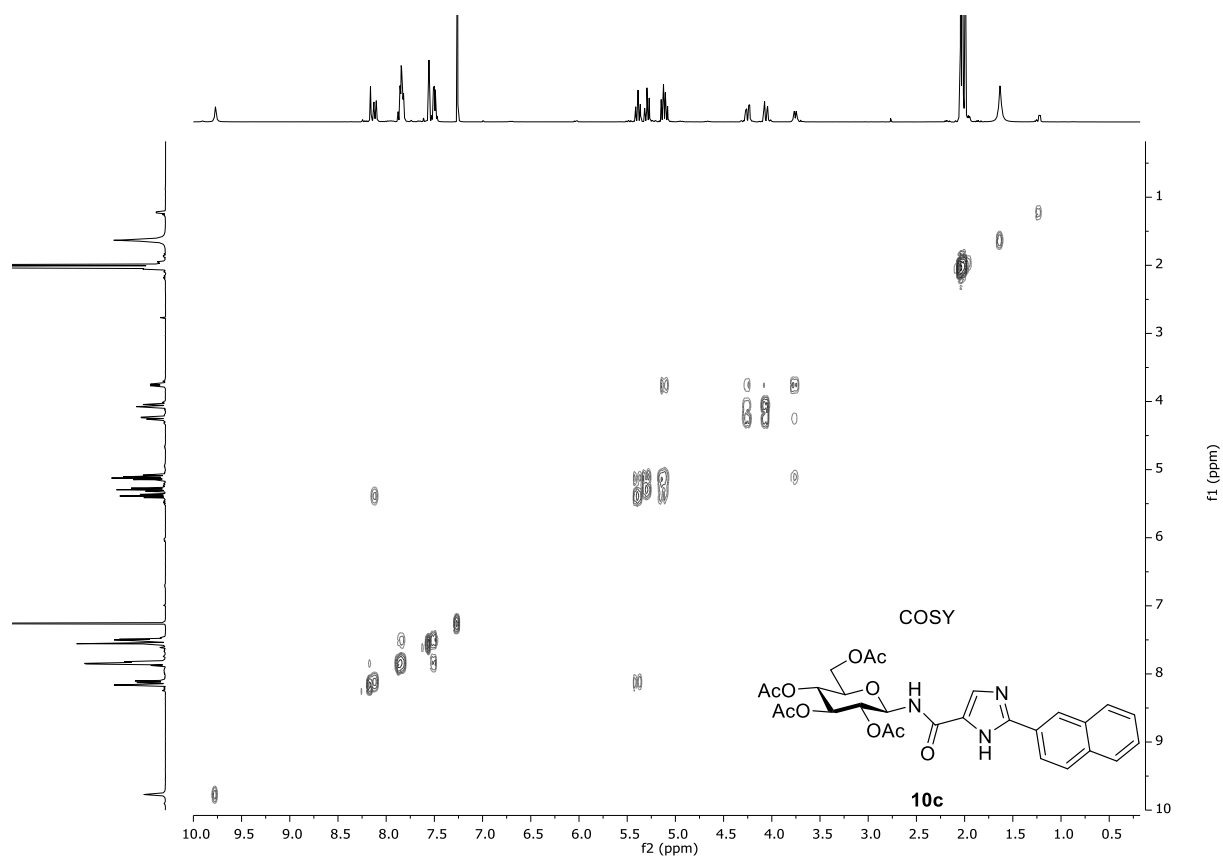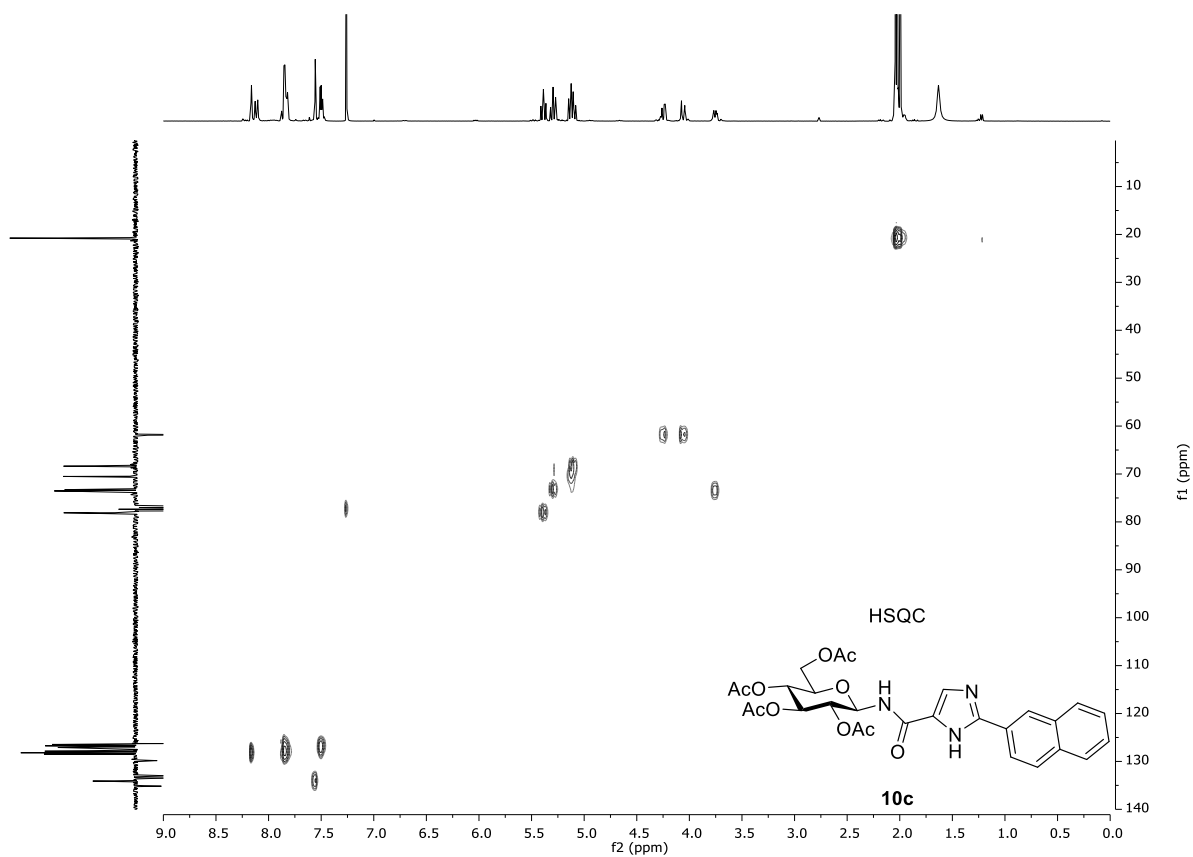

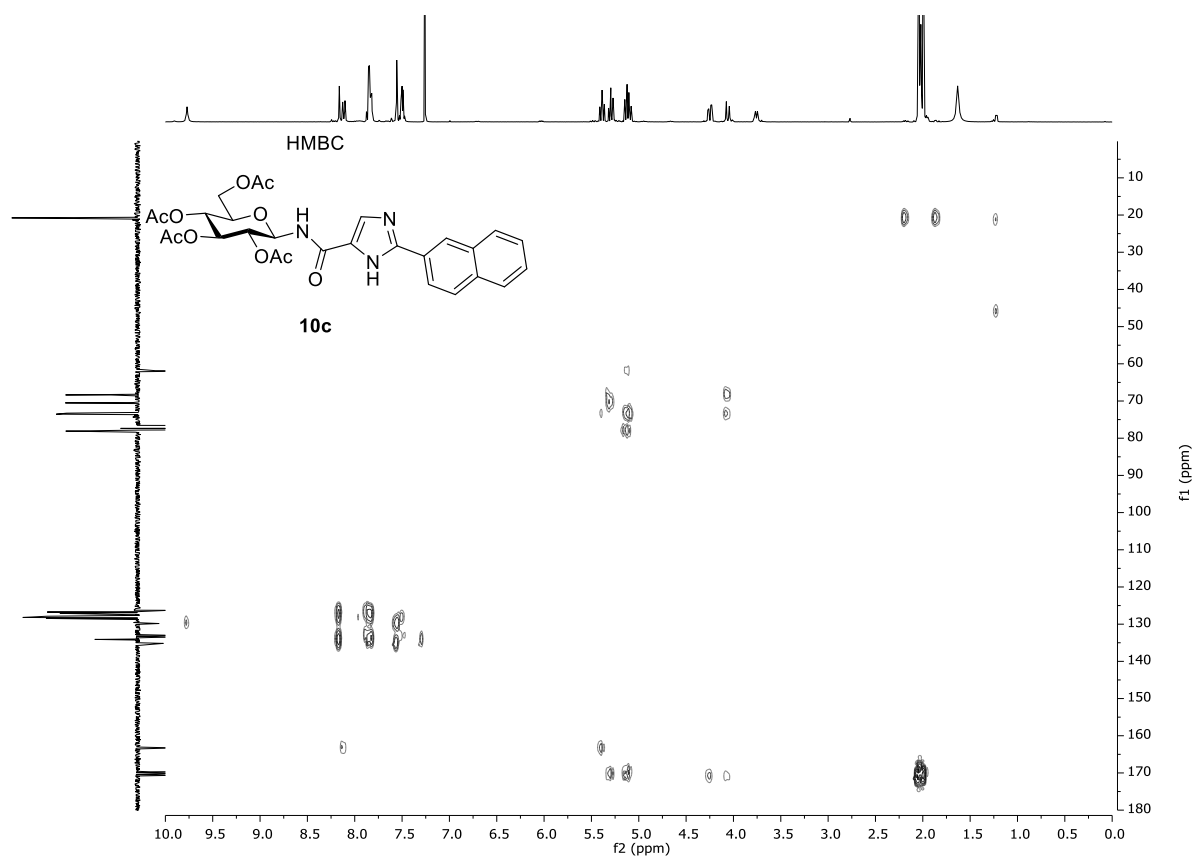

***N*-(2,3,4,6-Tetra-*O*-acetyl- $\beta$ -D-glucopyranosyl)-4(5)-phenyl-1*H*-imidazole-2-carboxamide (11a)**

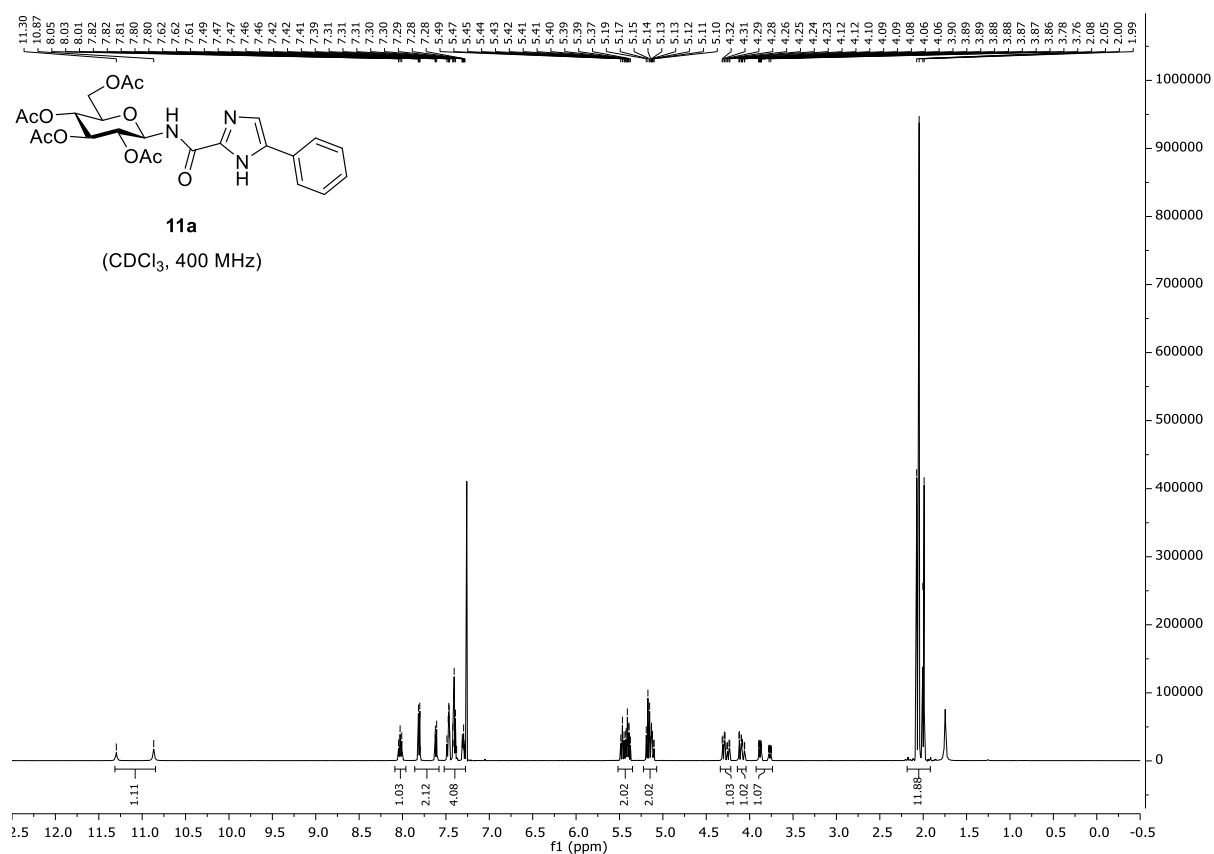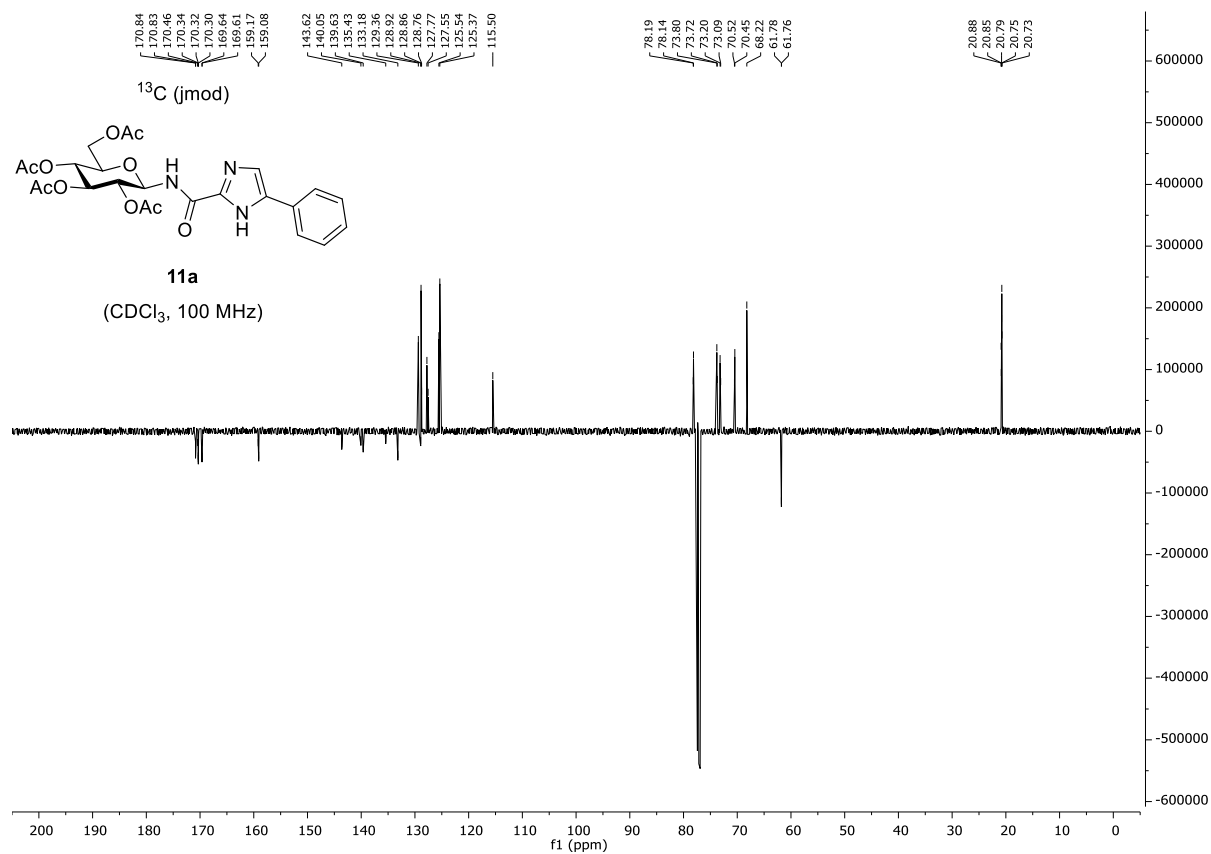

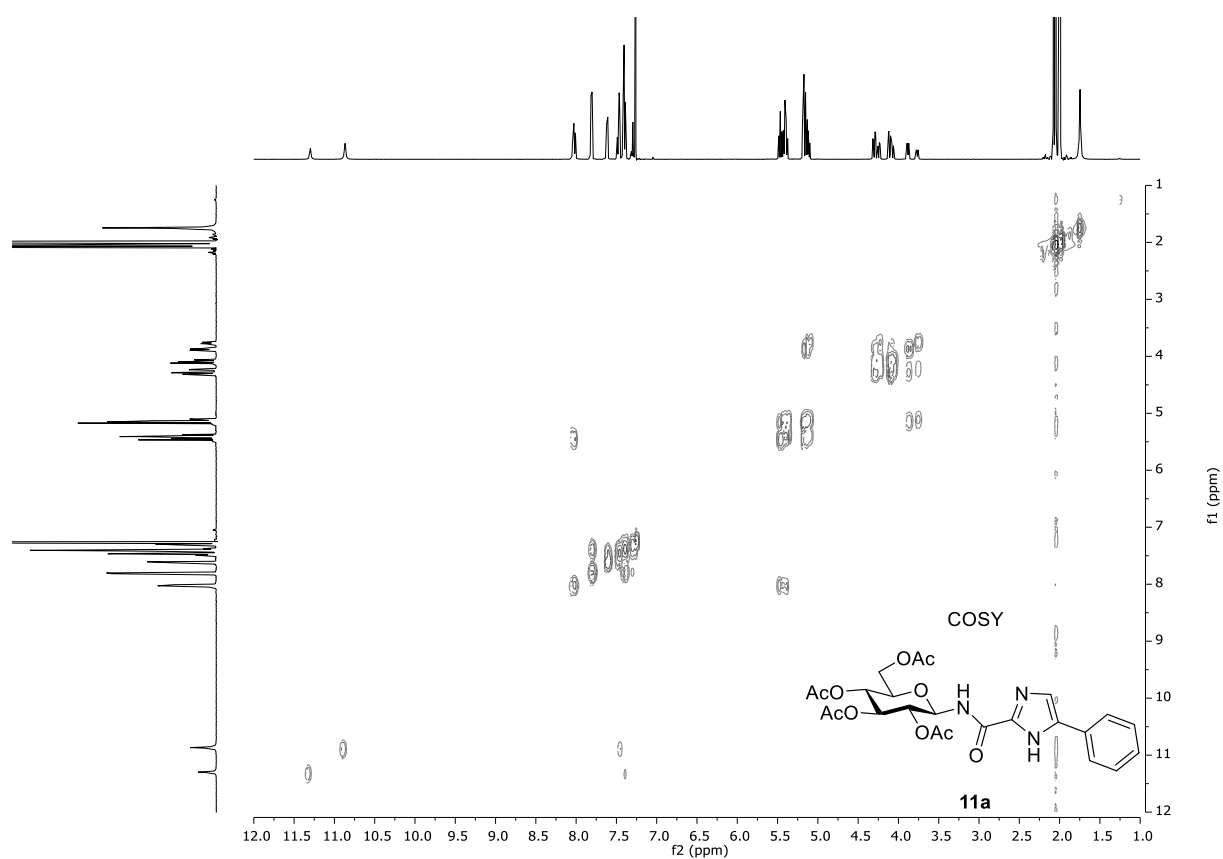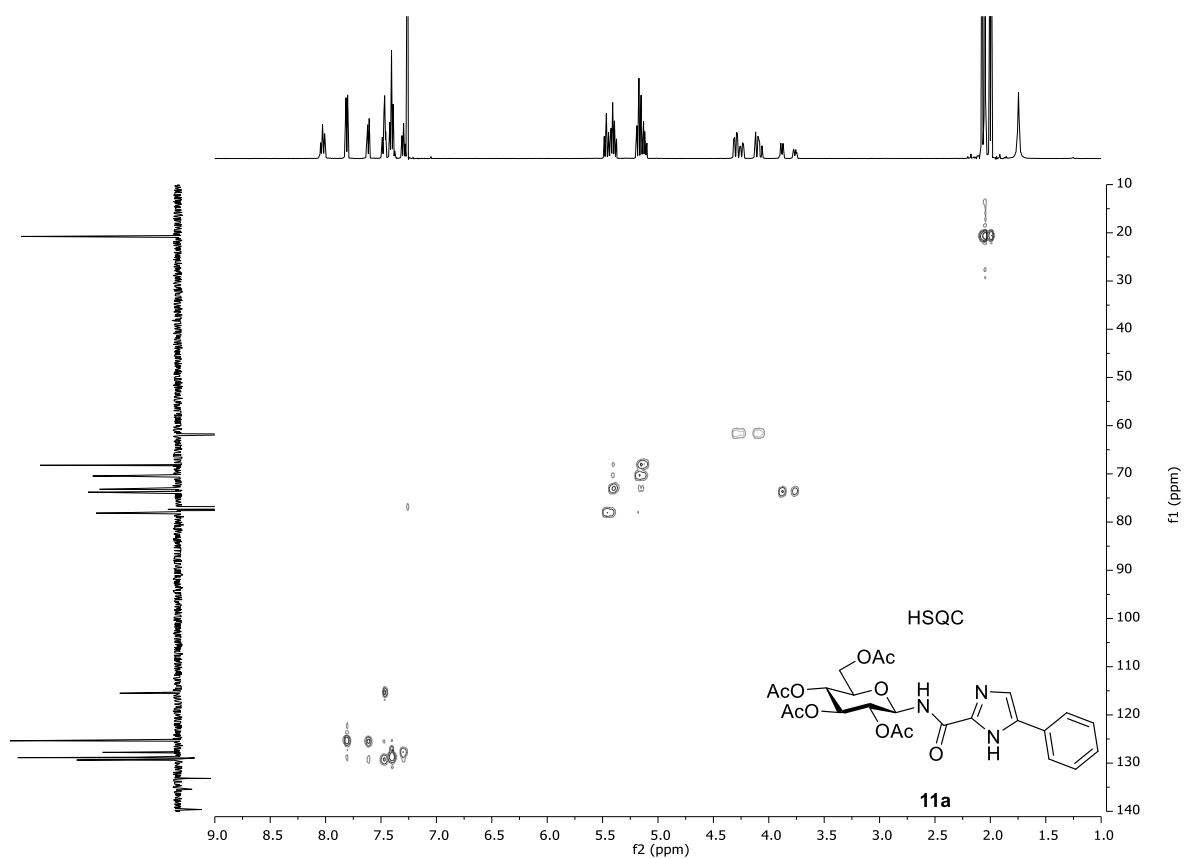

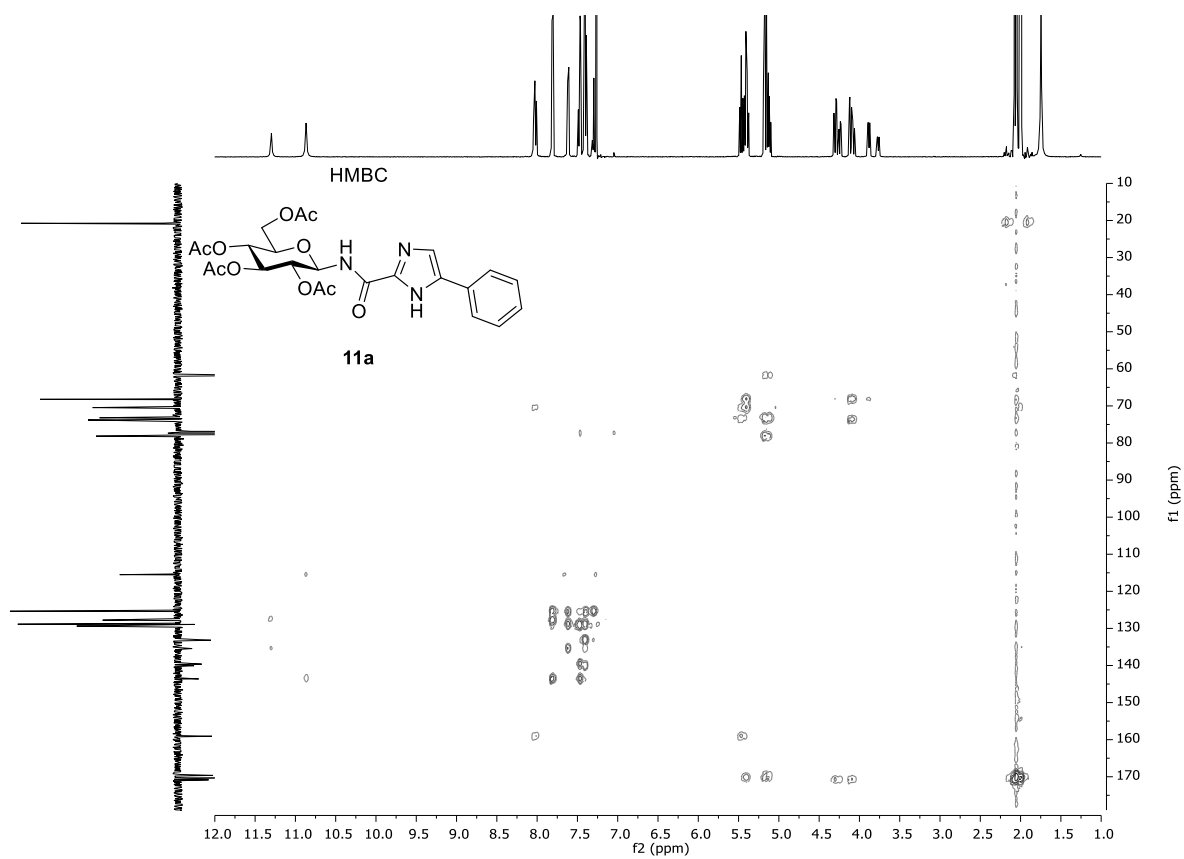



***N*-(2,3,4,6-Tetra-*O*-acetyl- $\beta$ -D-glucopyranosyl)-4(5)-(1-naphthyl)-1*H*-imidazole-2-carboxamide (**11b**)**

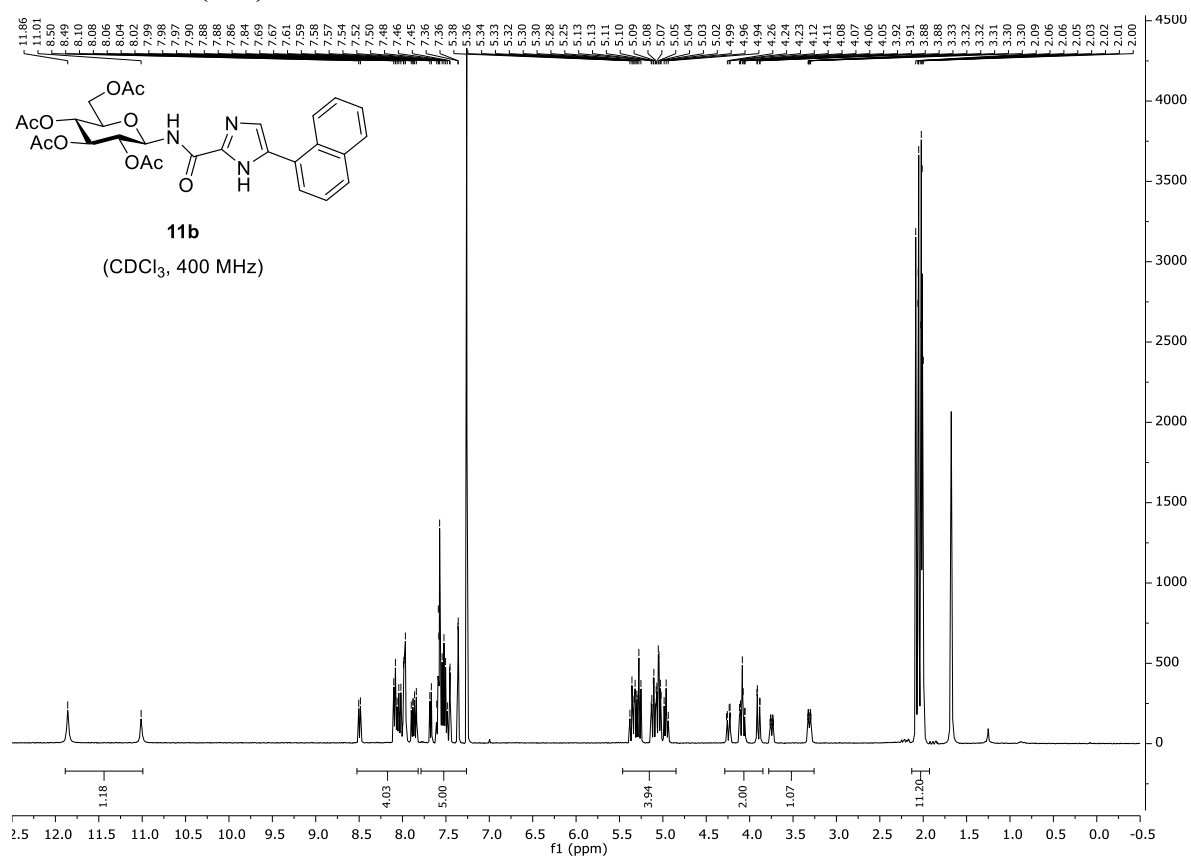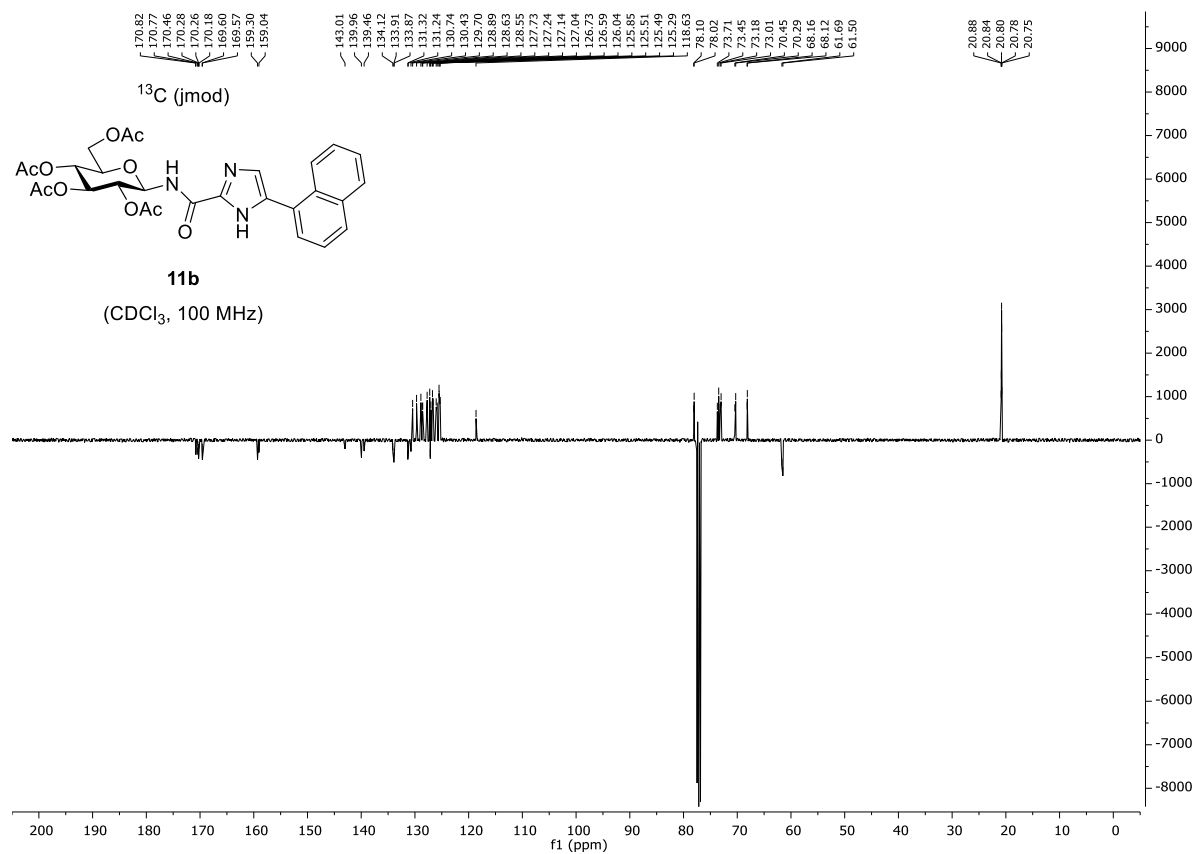

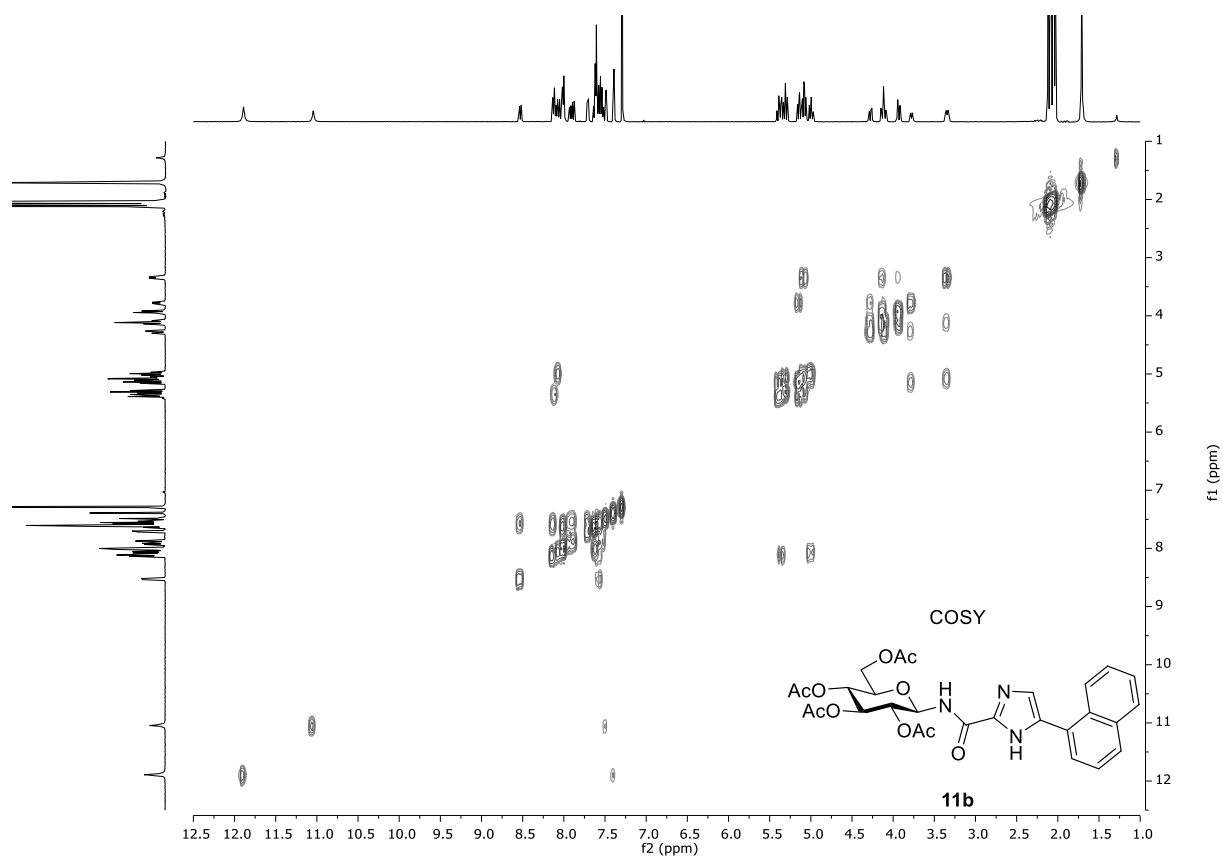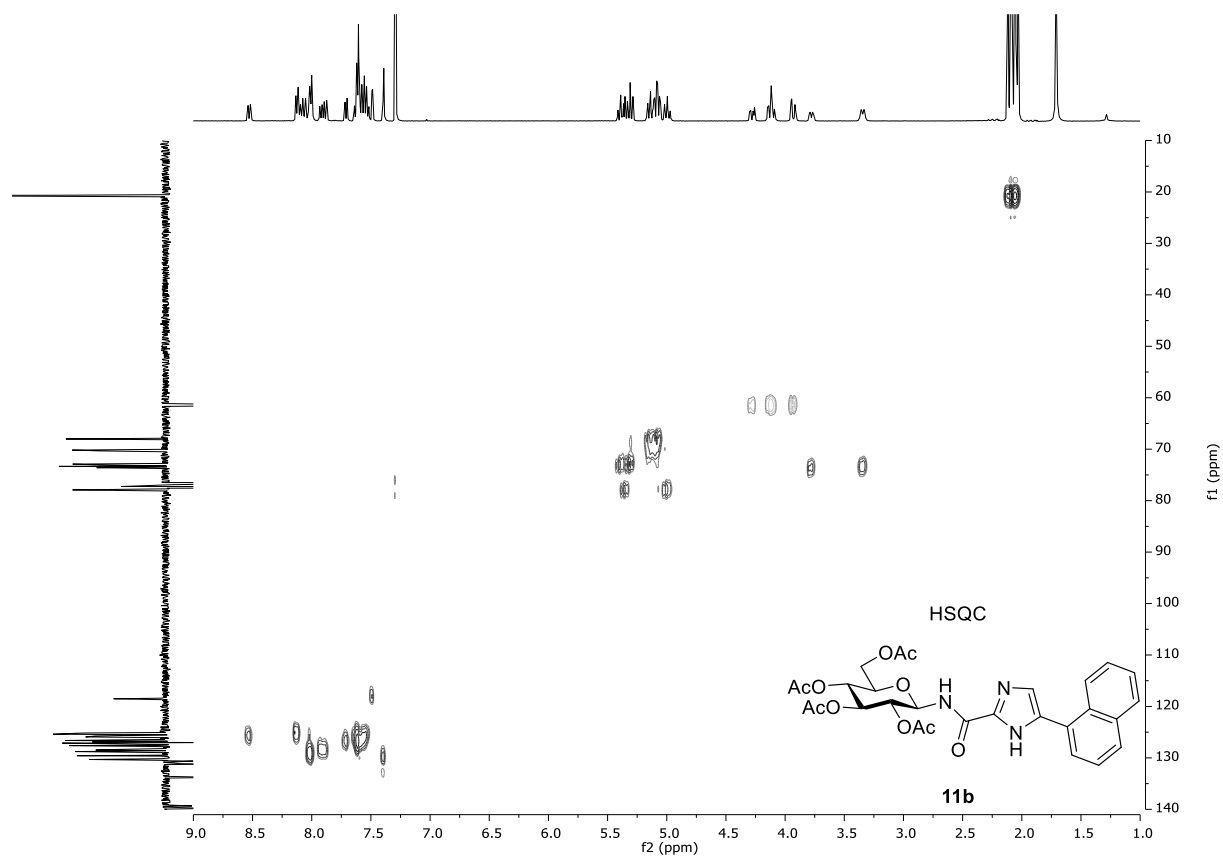

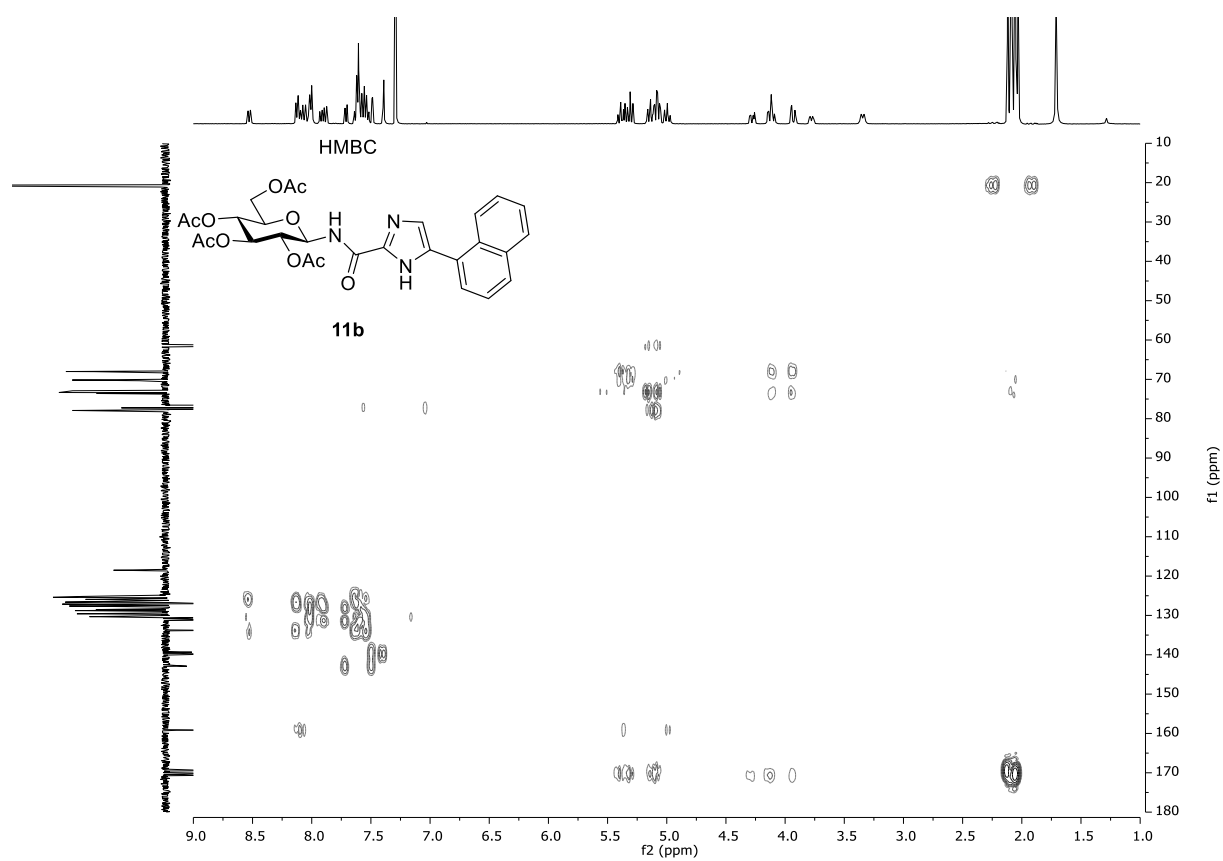

***N*-(2,3,4,6-Tetra-*O*-acetyl- $\beta$ -D-glucopyranosyl)-4(5)-(2-naphthyl)-1*H*-imidazole-2-carboxamide (11c)**

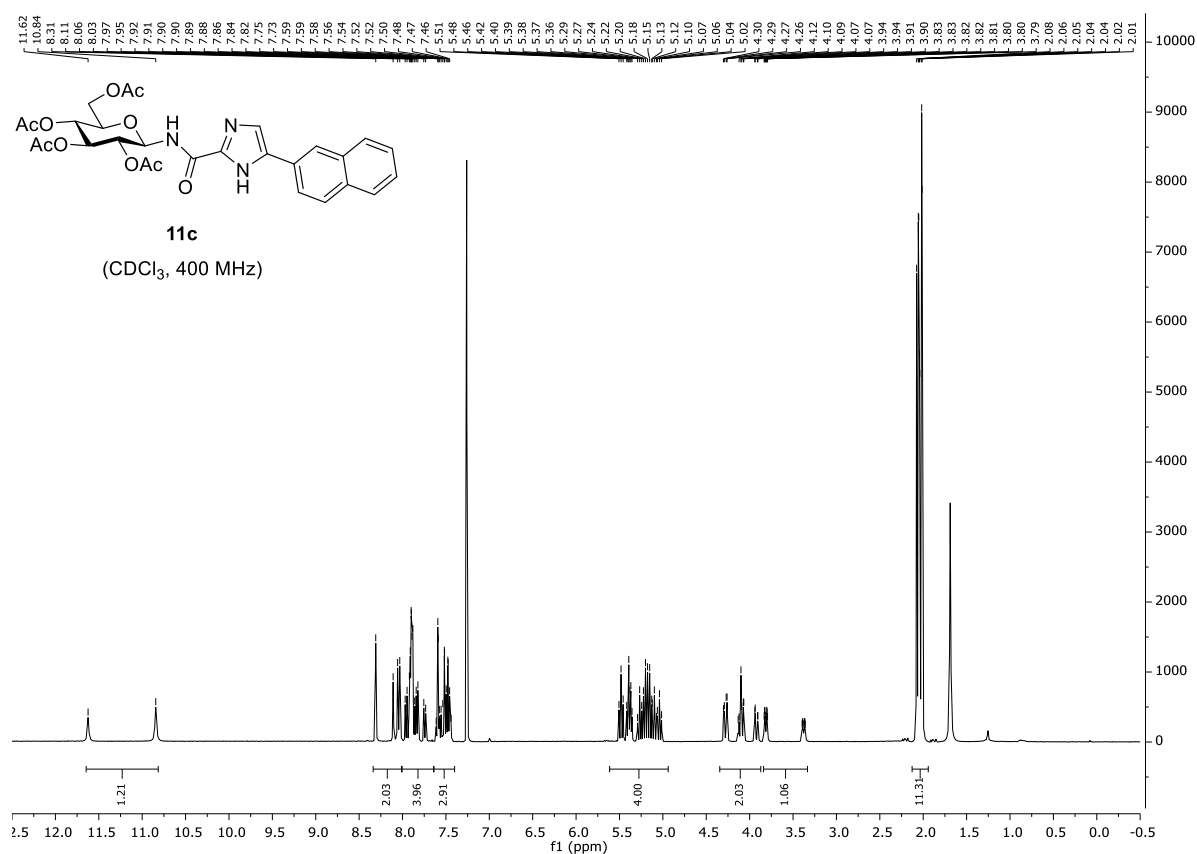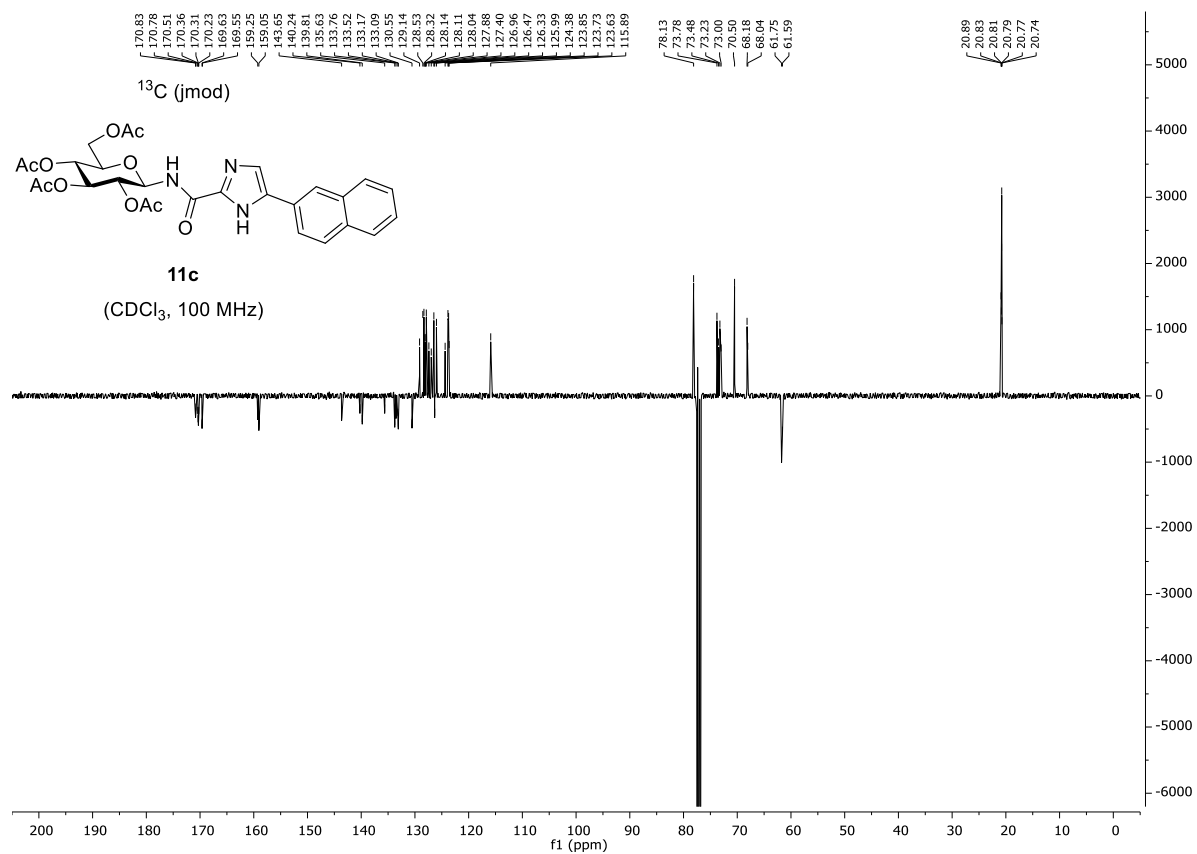

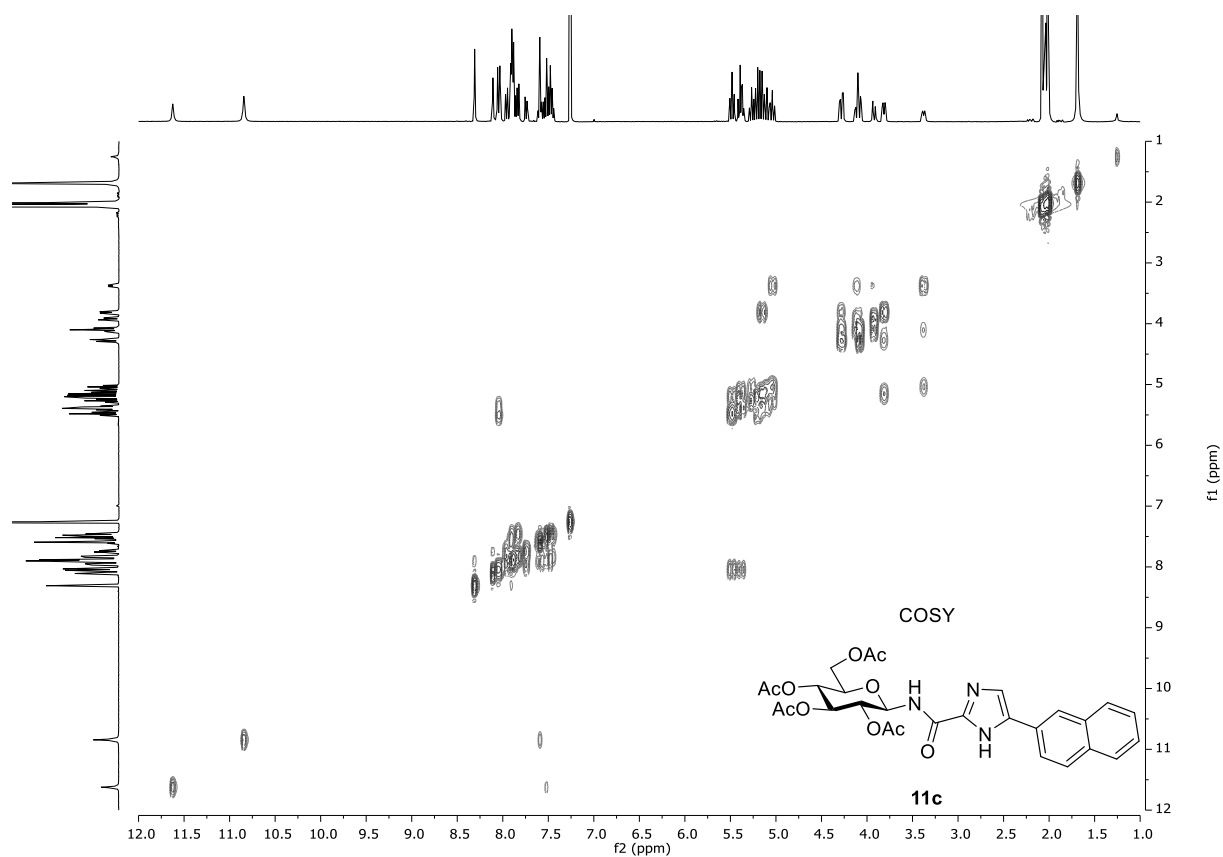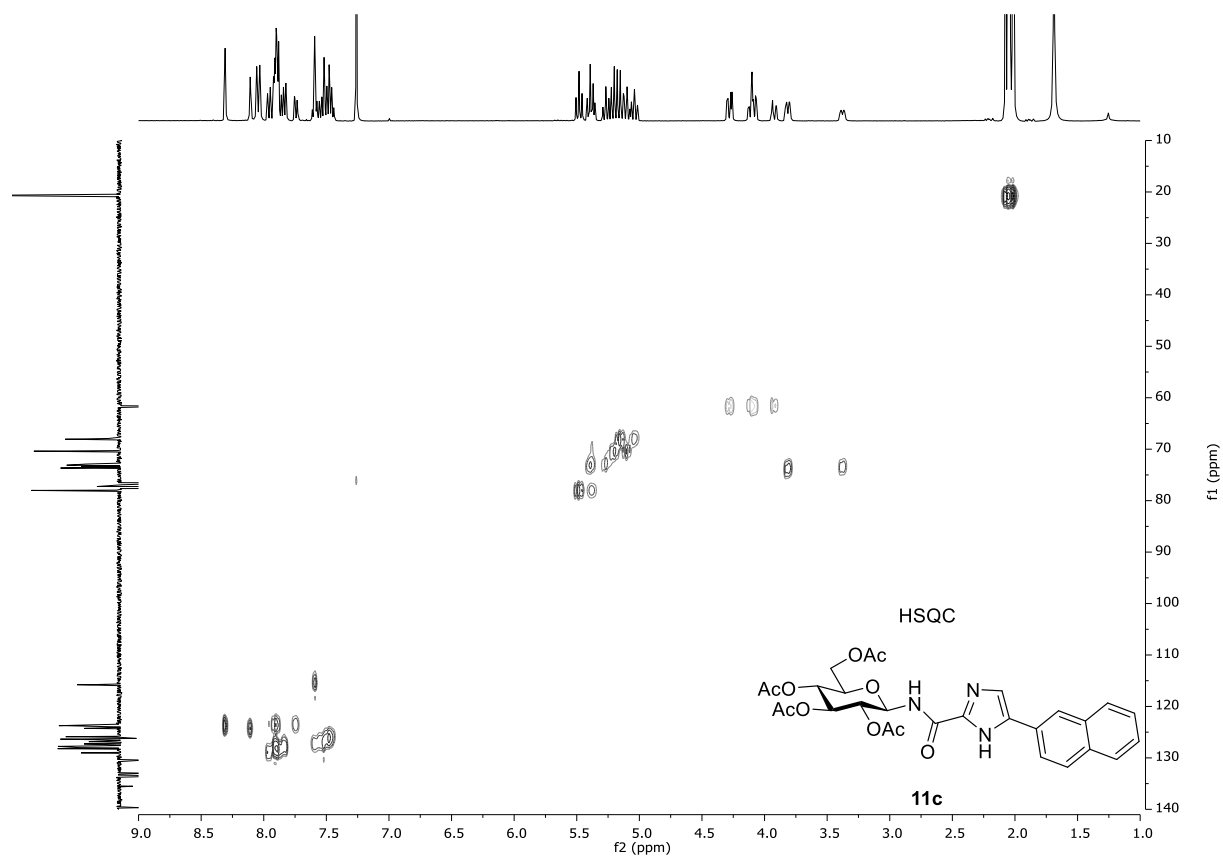

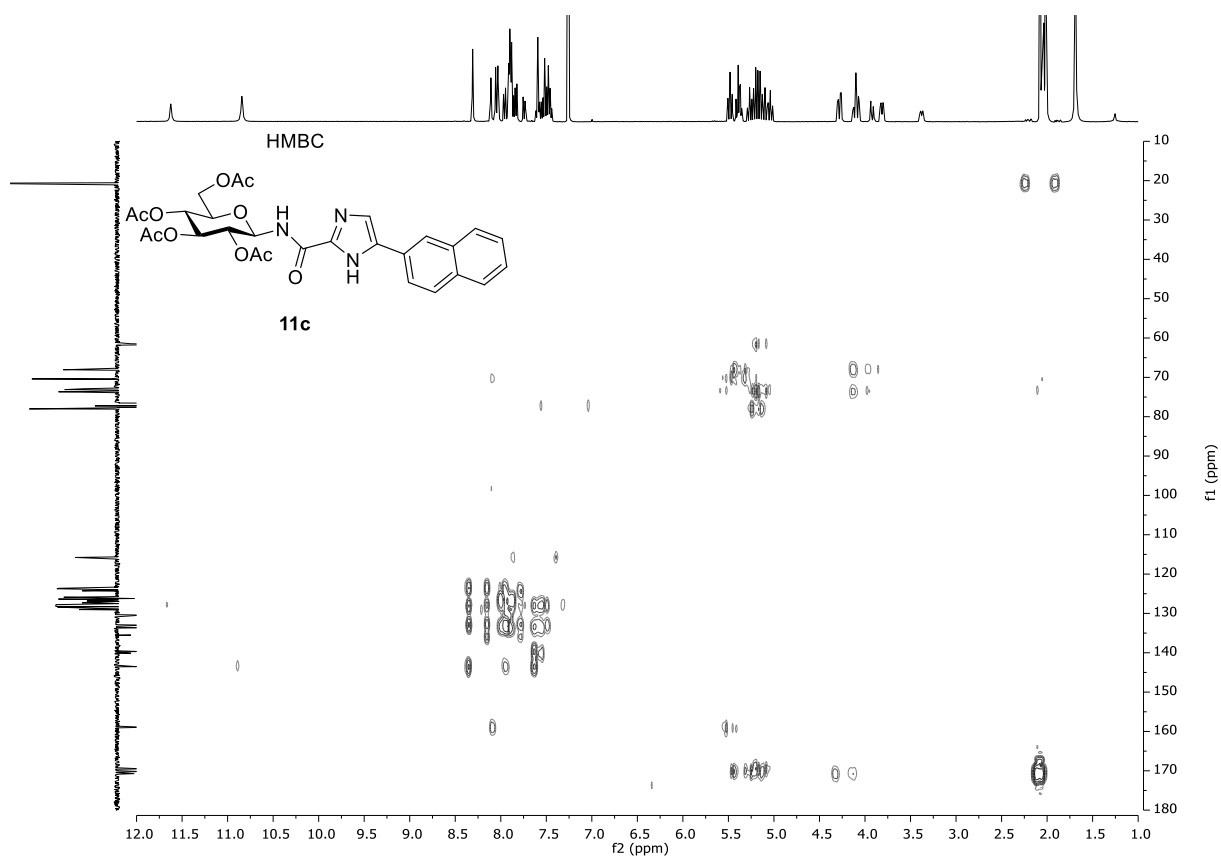

# ***N*-(β-D-Glucopyranosyl)-2-phenyl-1*H*-imidazole-4(5)-carboxamide (1a)**

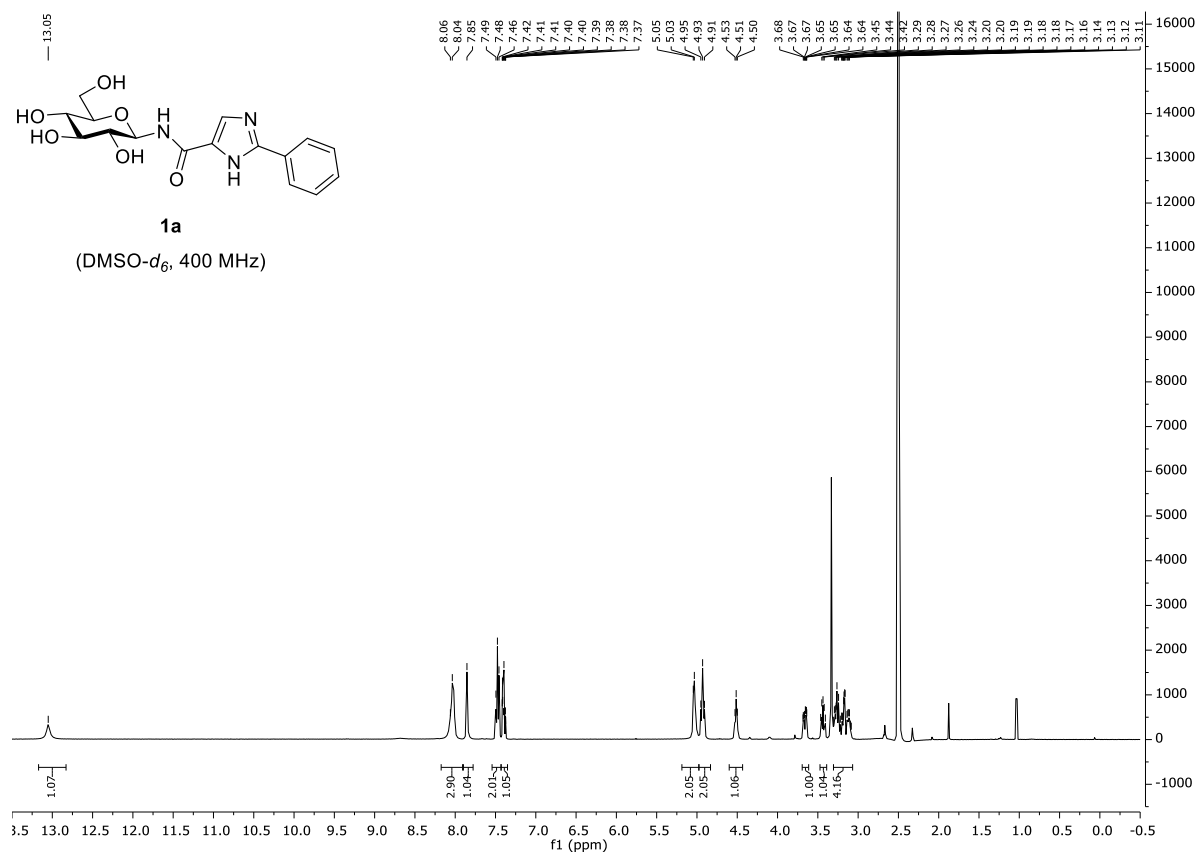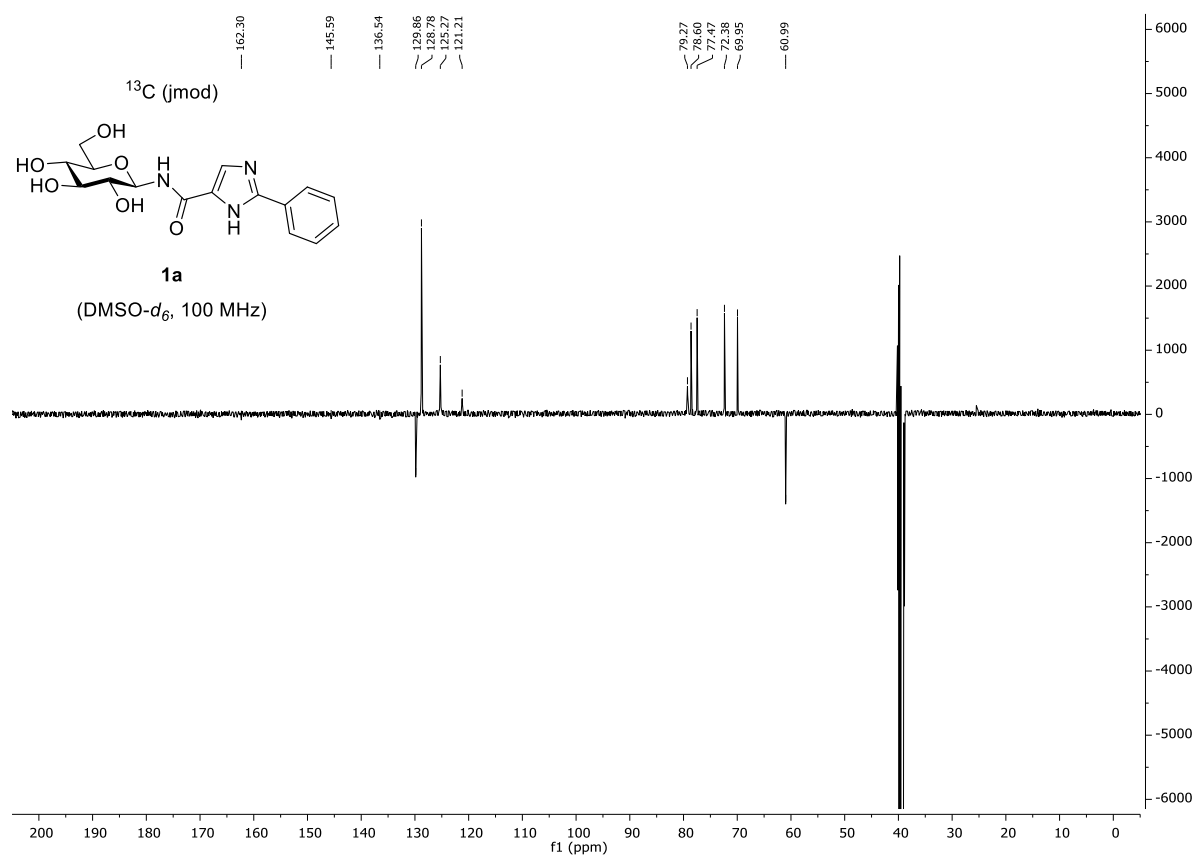

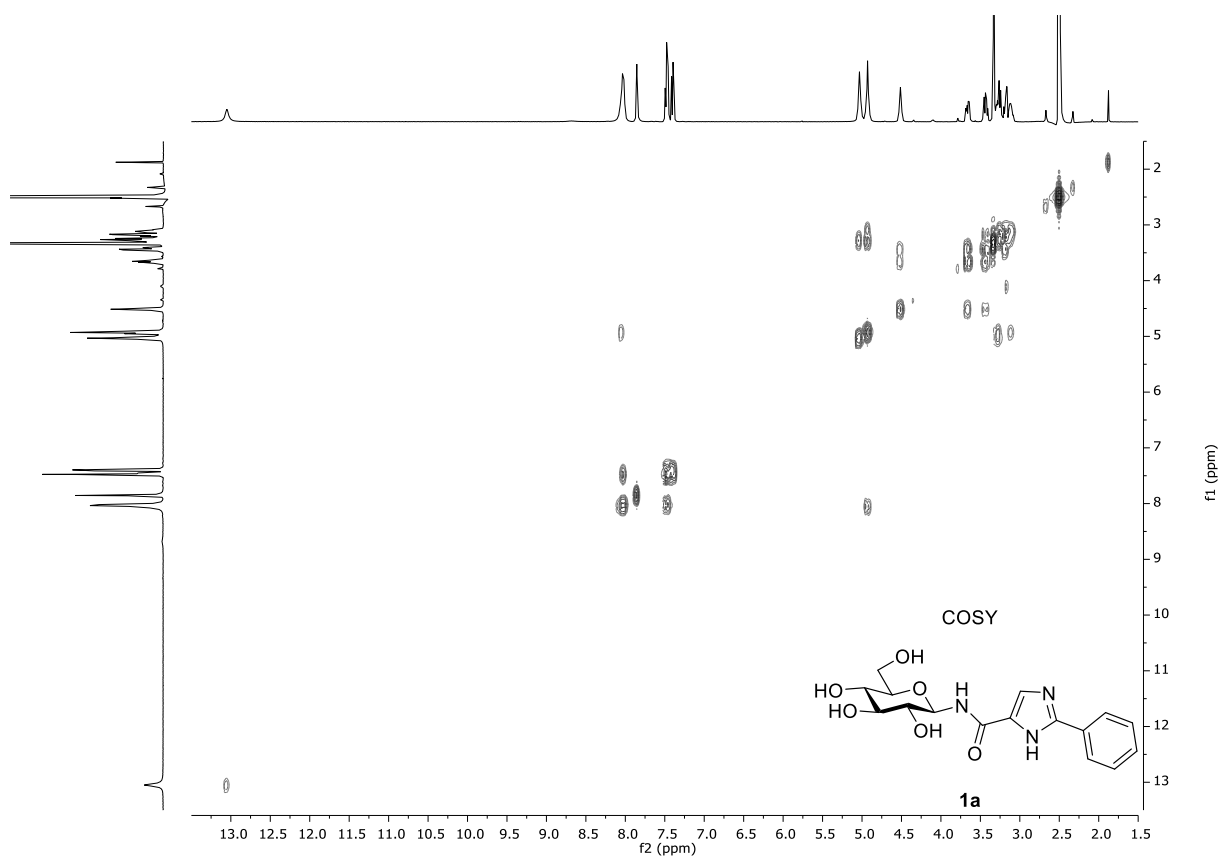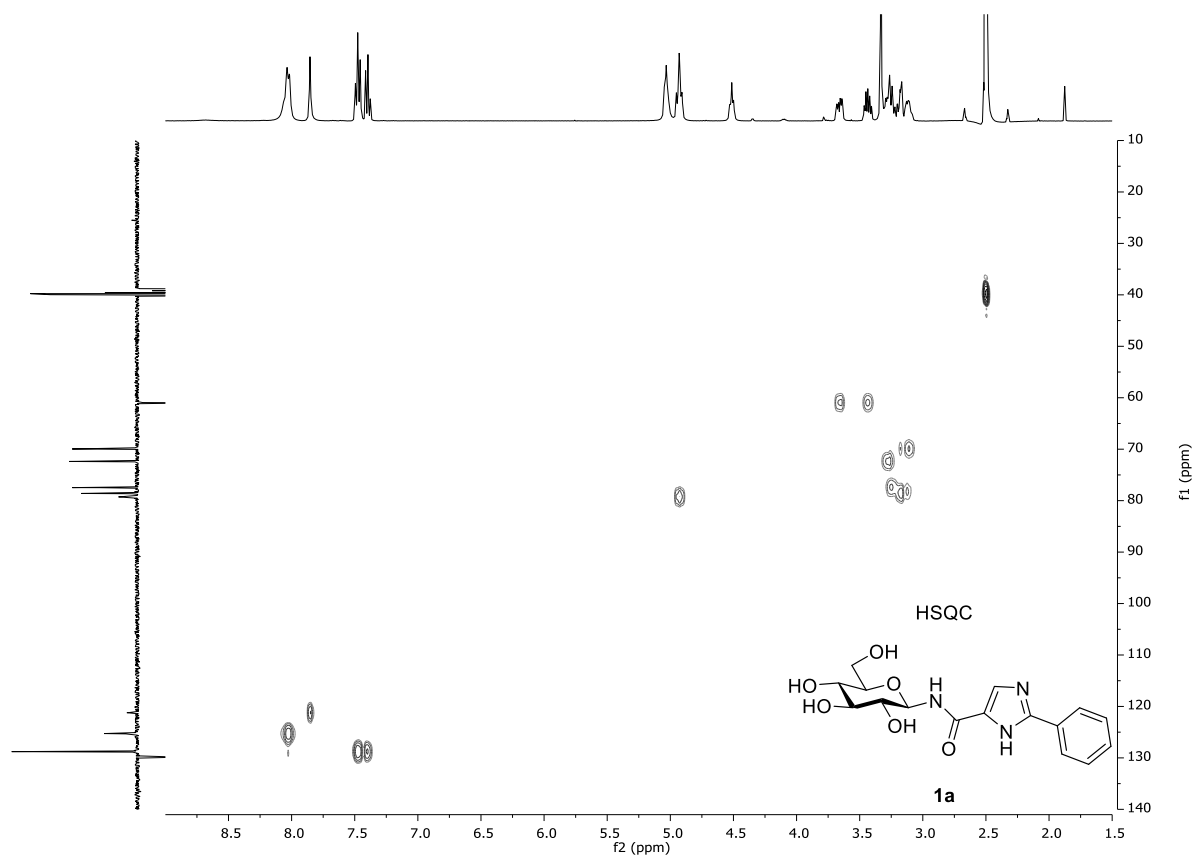



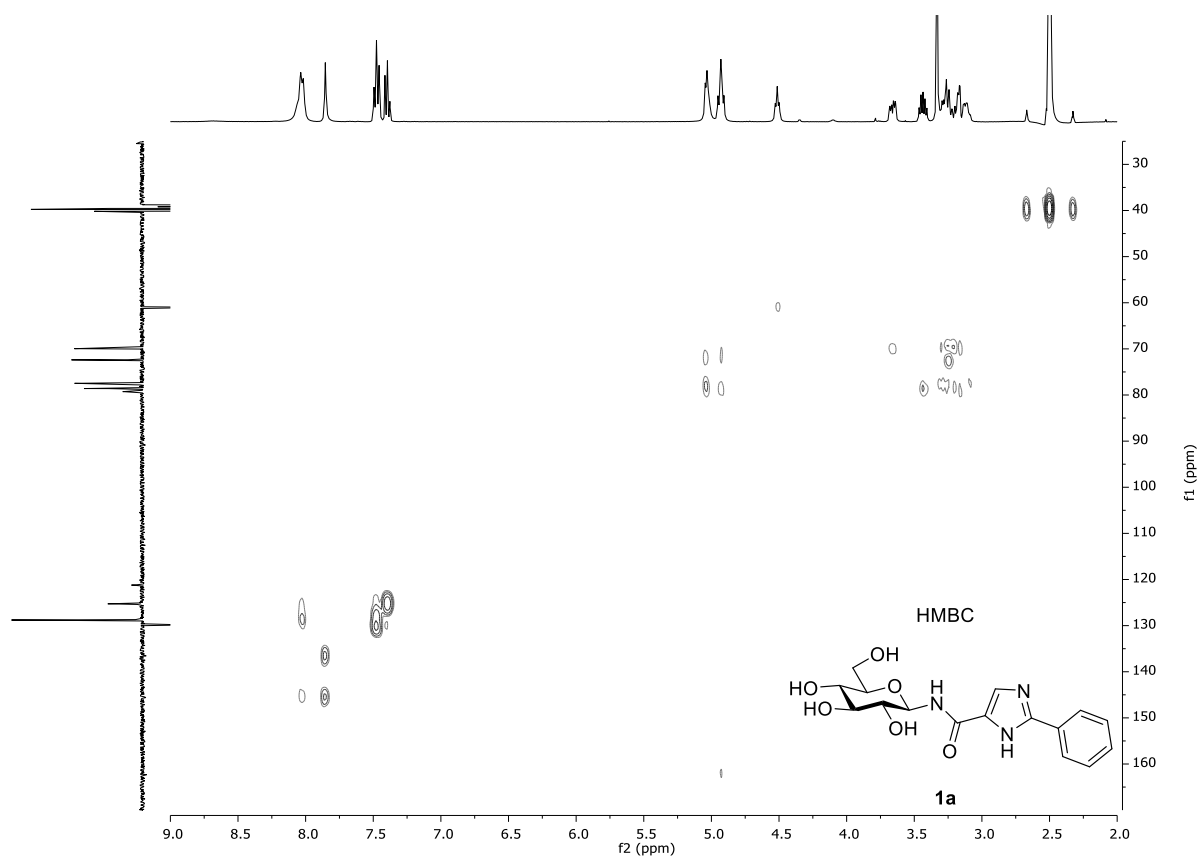

[illegible]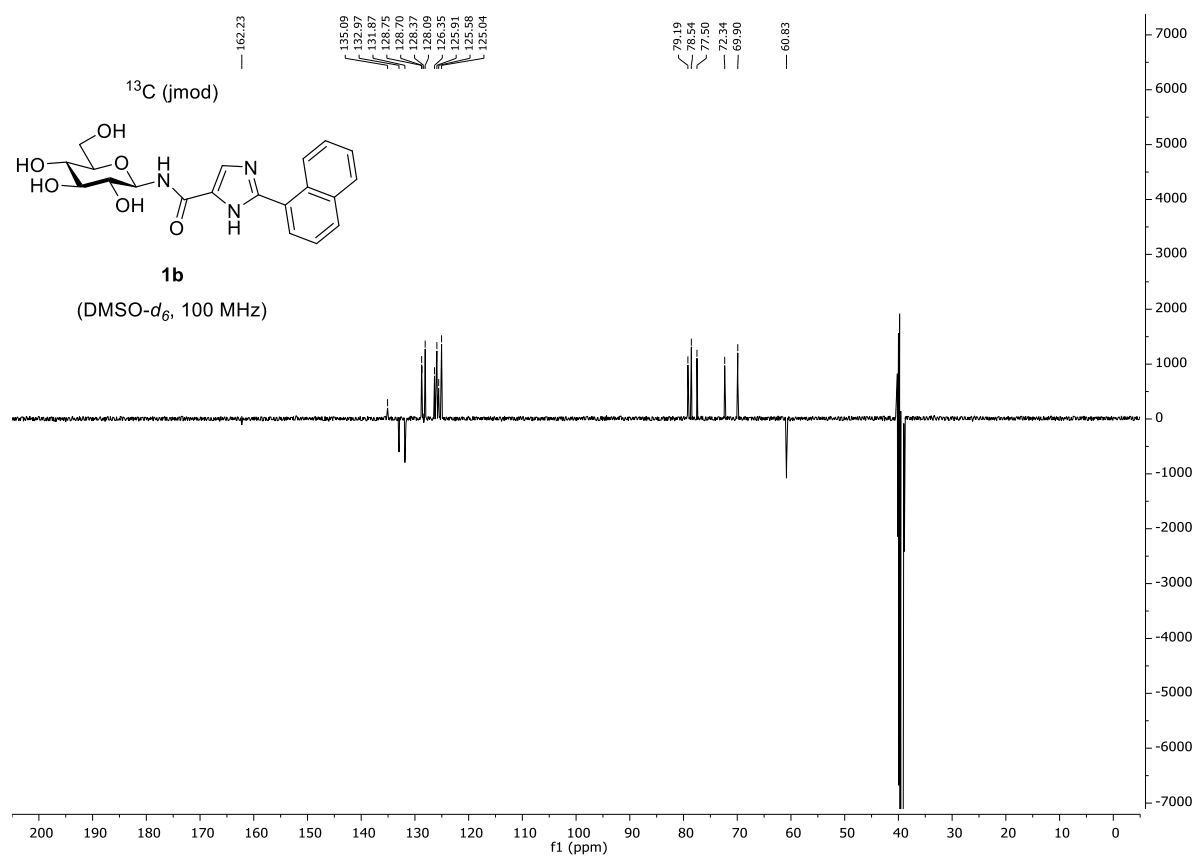

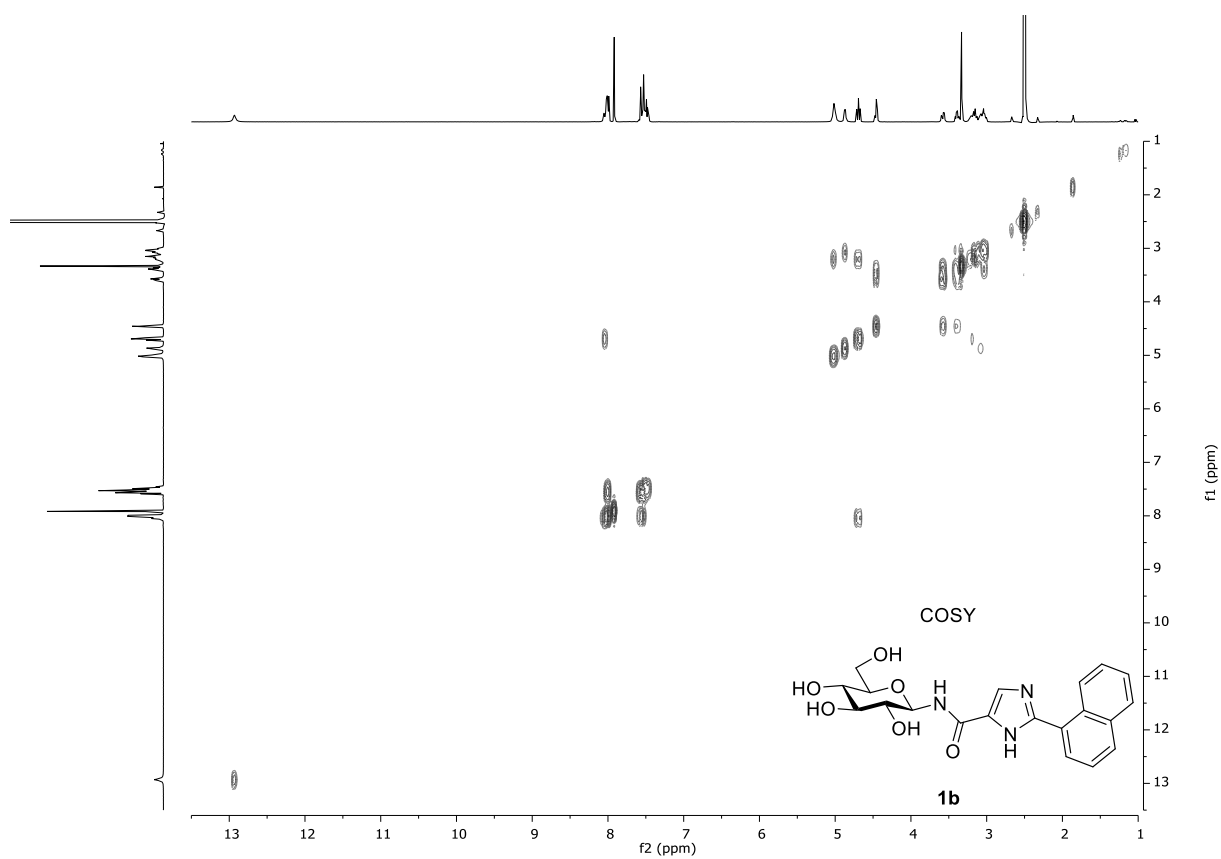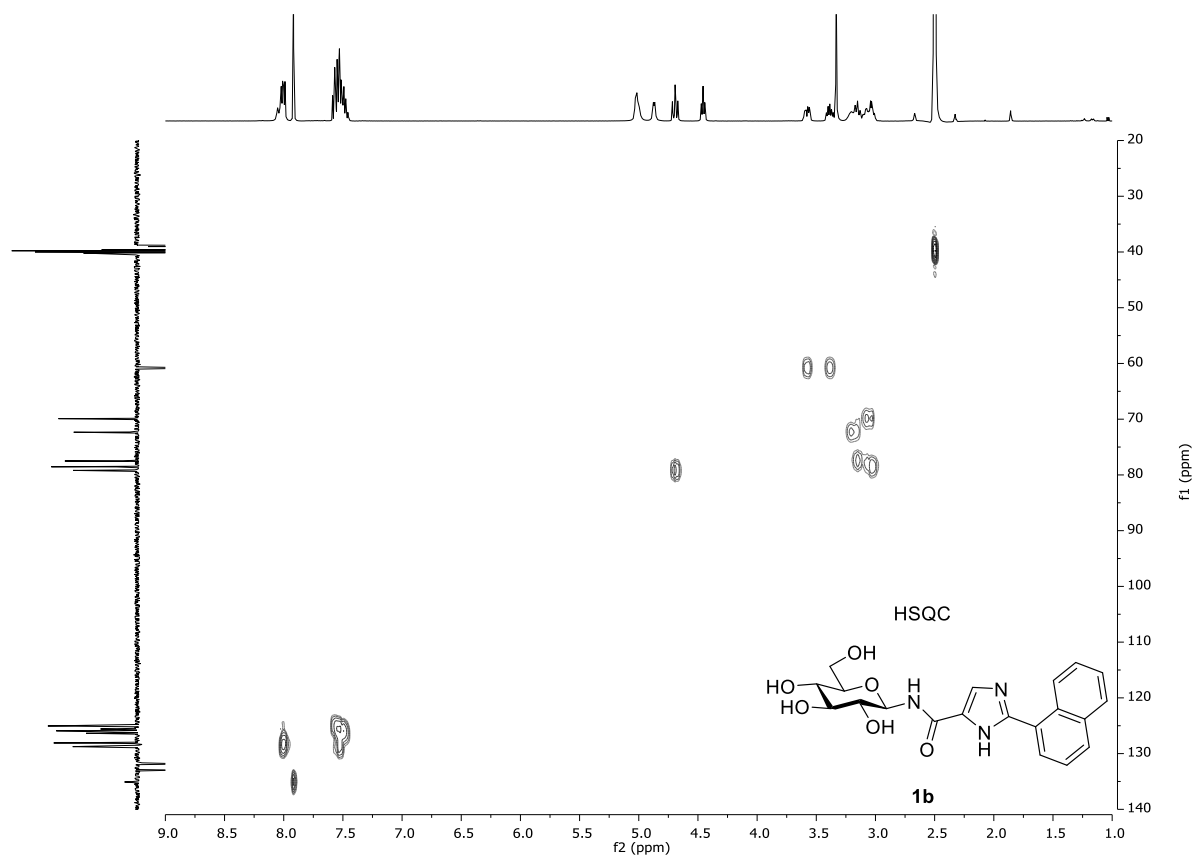

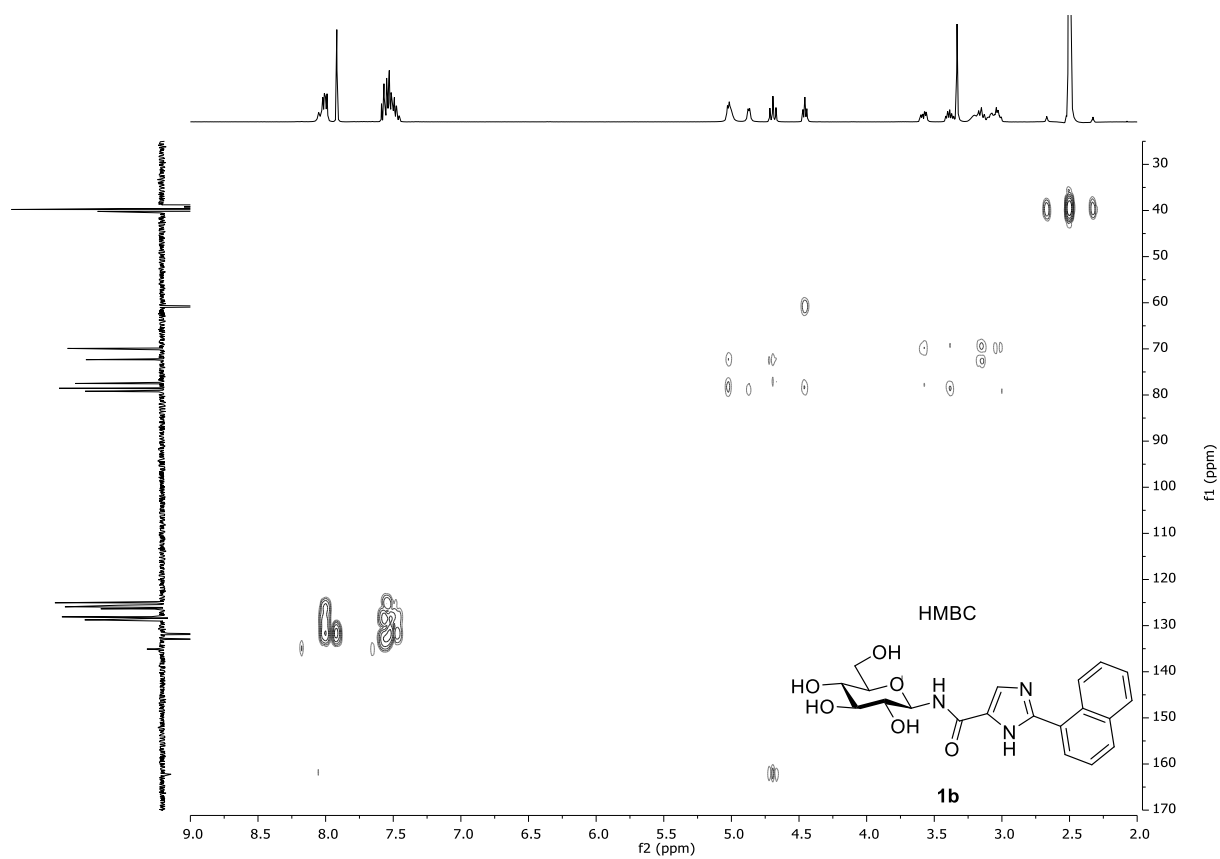

***N*-( $\beta$ -D-Glucopyranosyl)-2-(2-naphthyl)-1*H*-imidazole-4(5)-carboxamide (1c)**

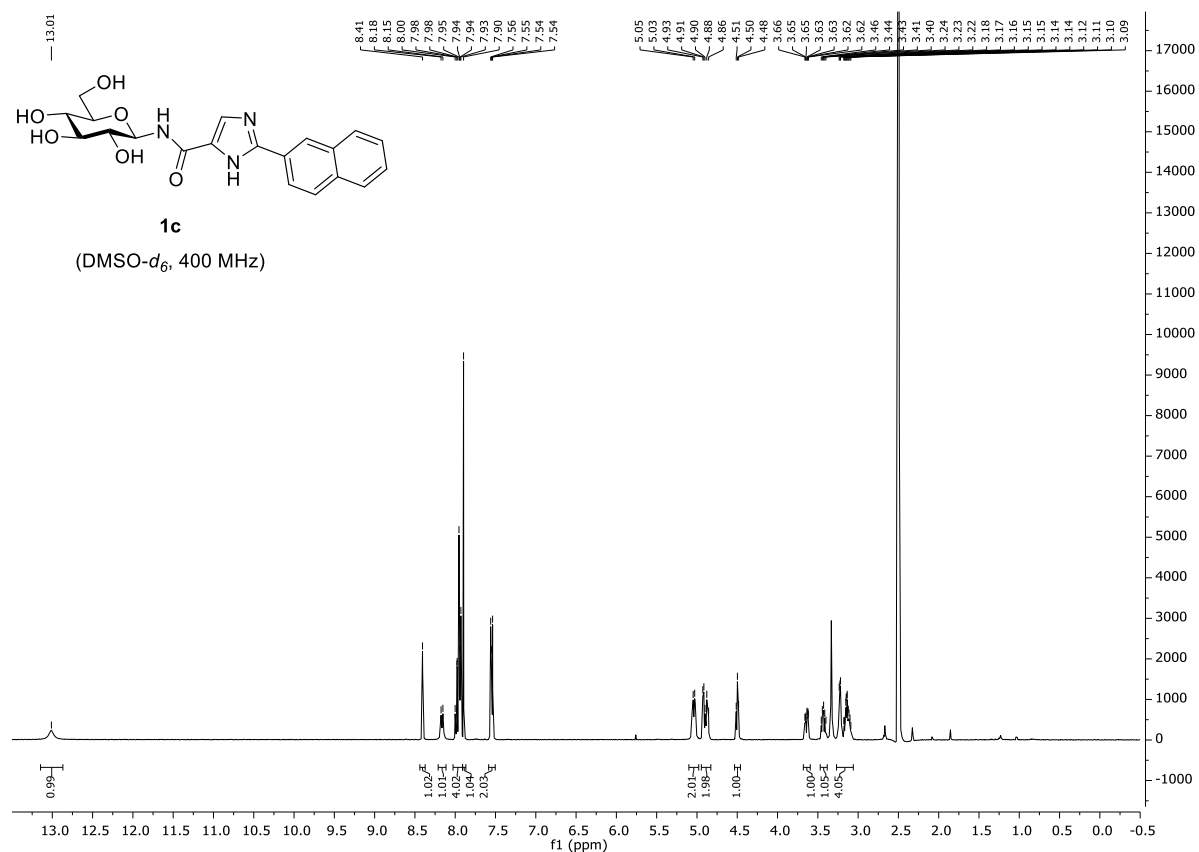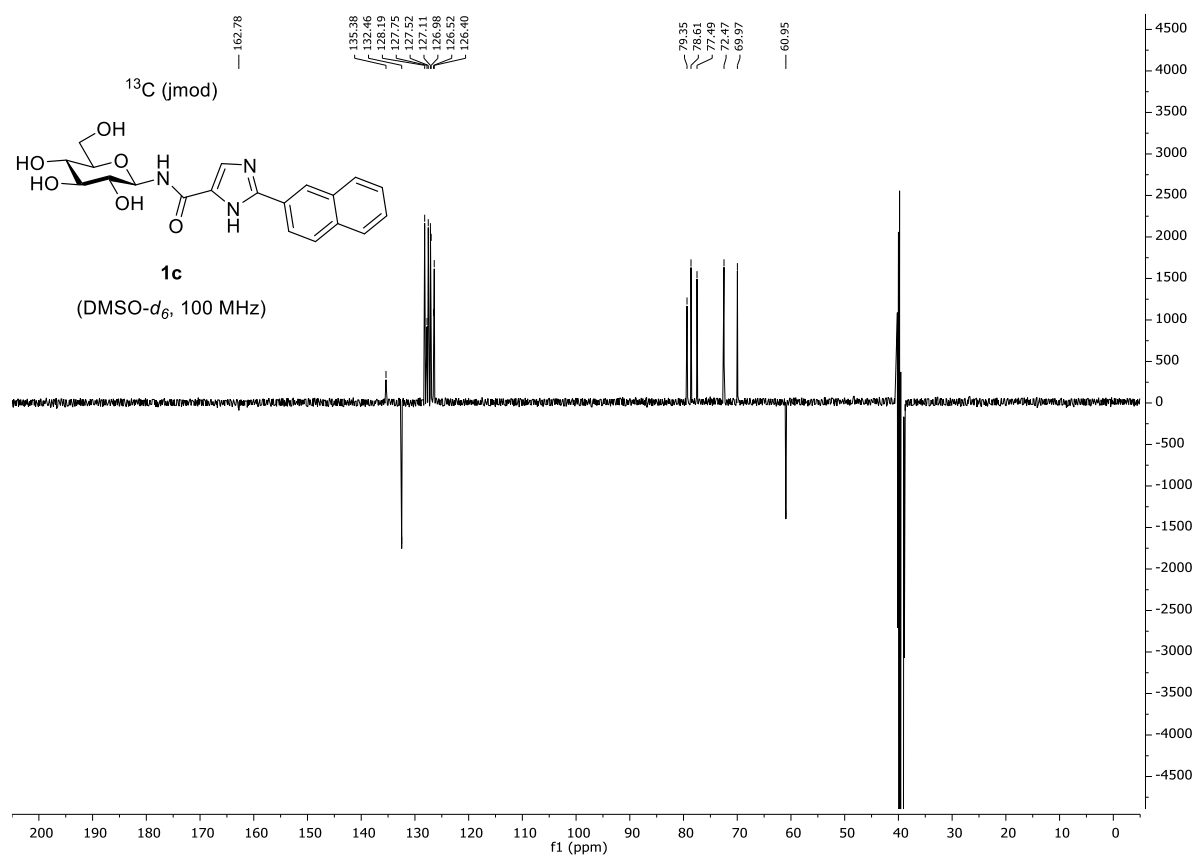

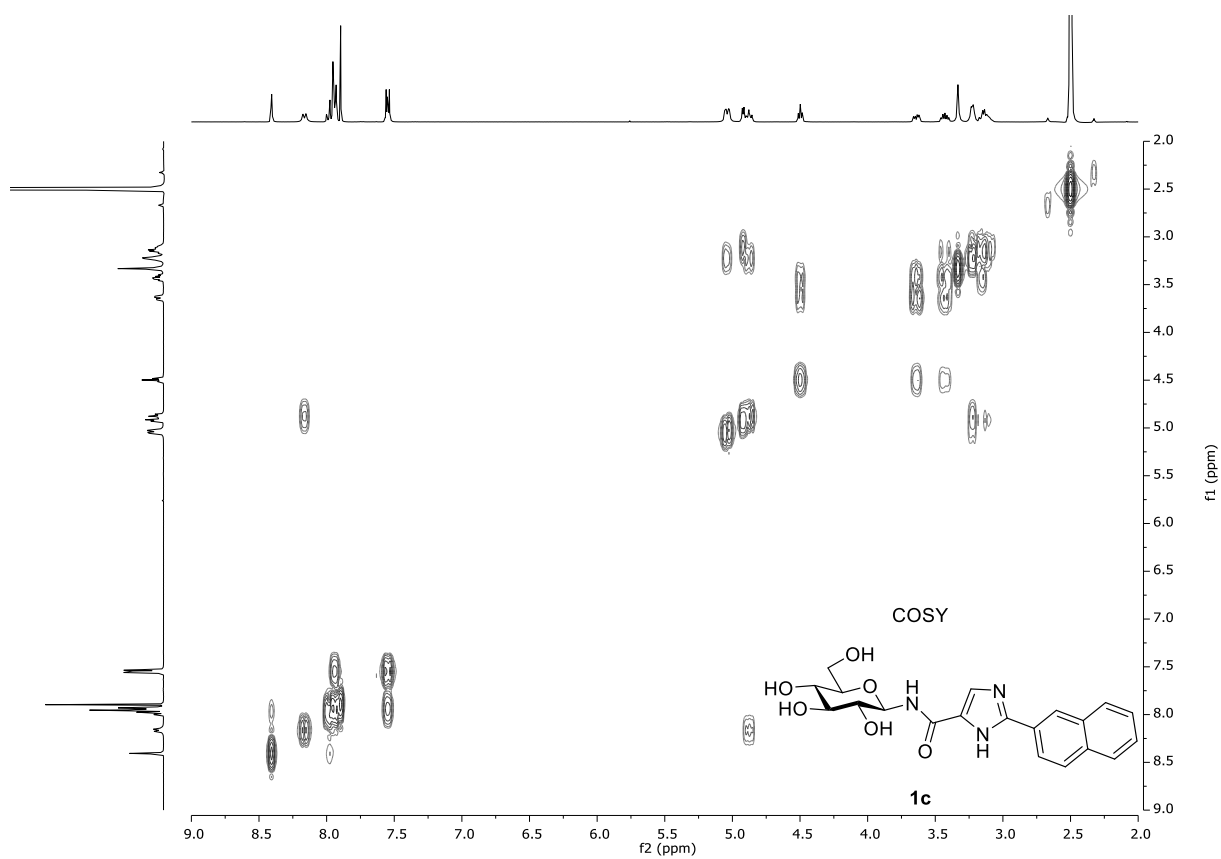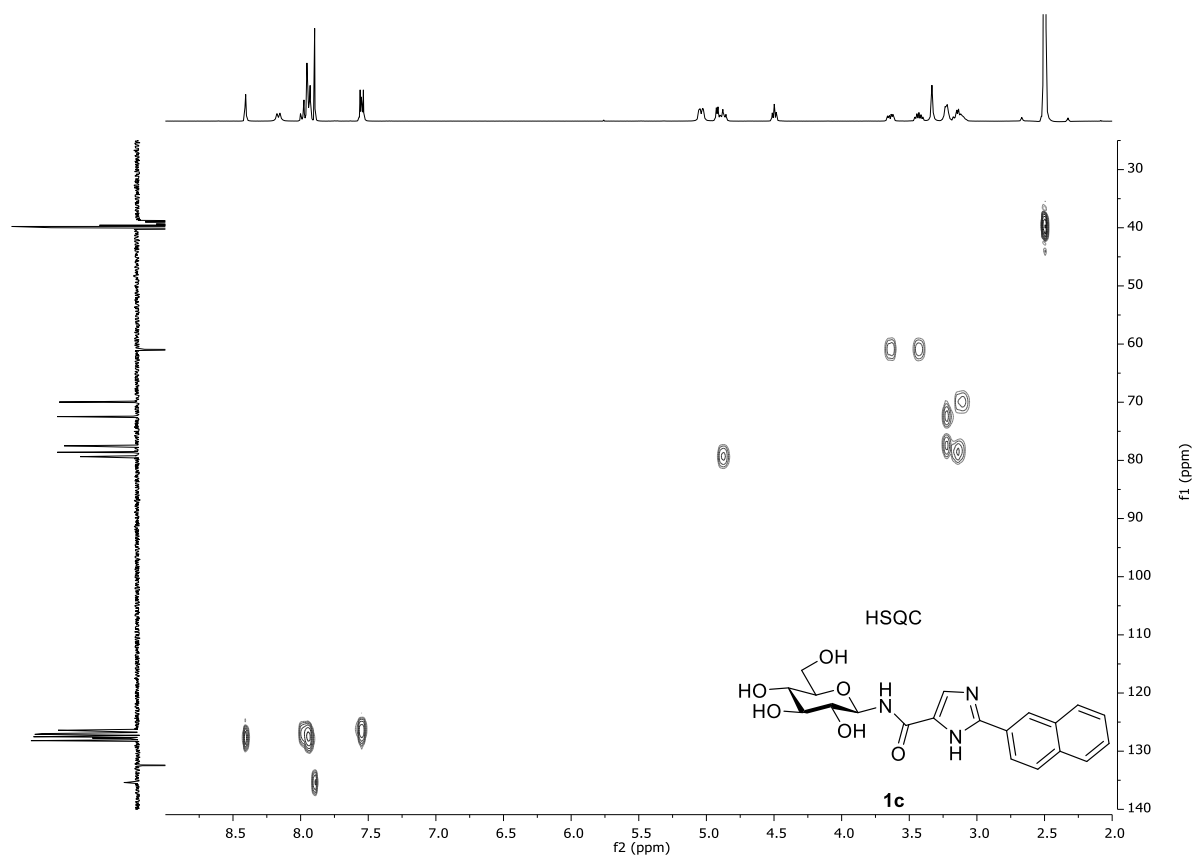

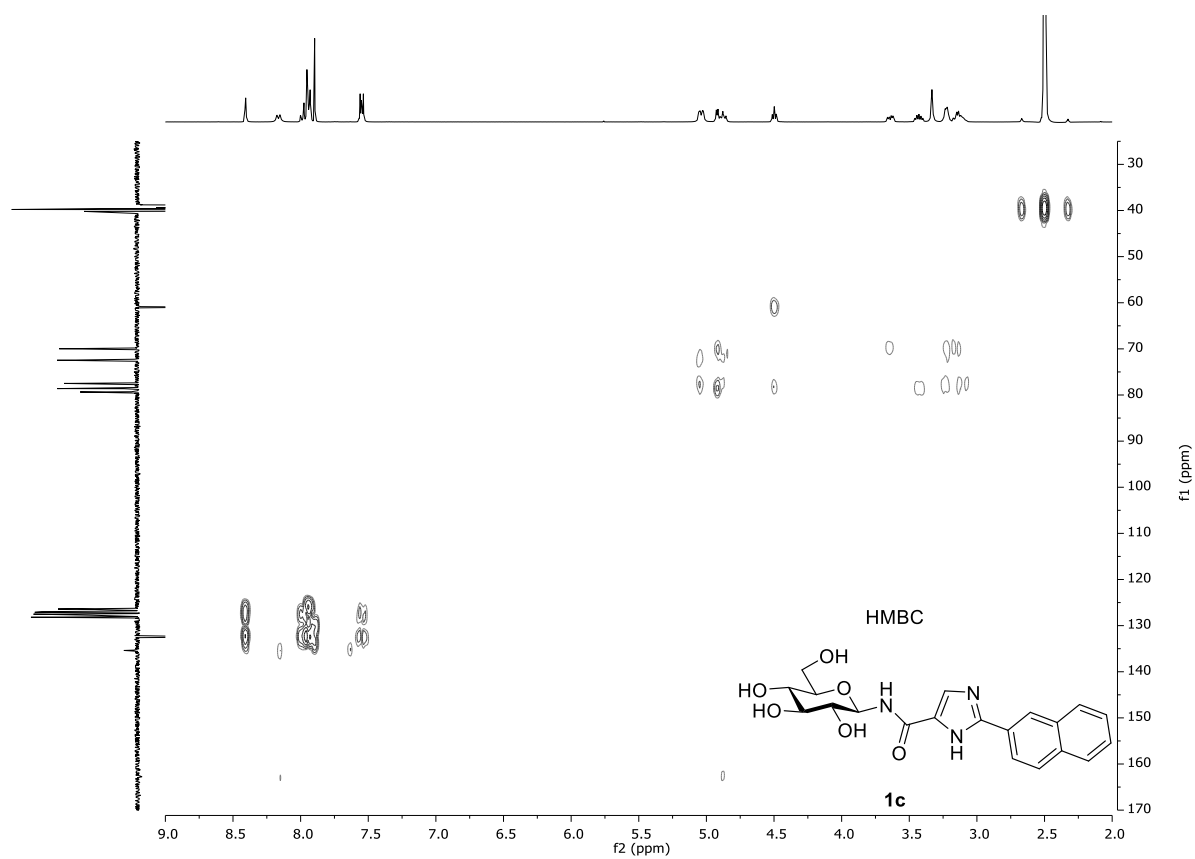

# ***N*-(β-D-Glucopyranosyl)-4(5)-phenyl-1*H*-imidazole-2-carboxamide (2a)**

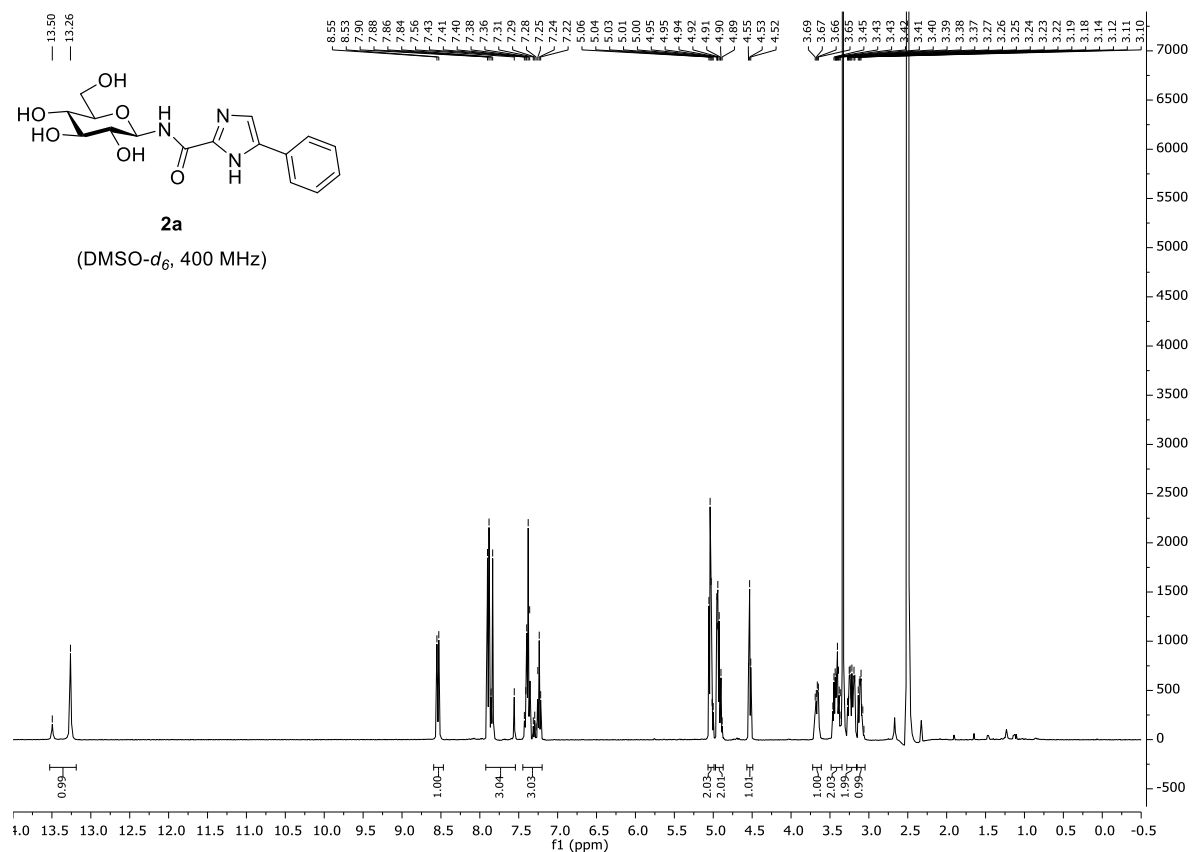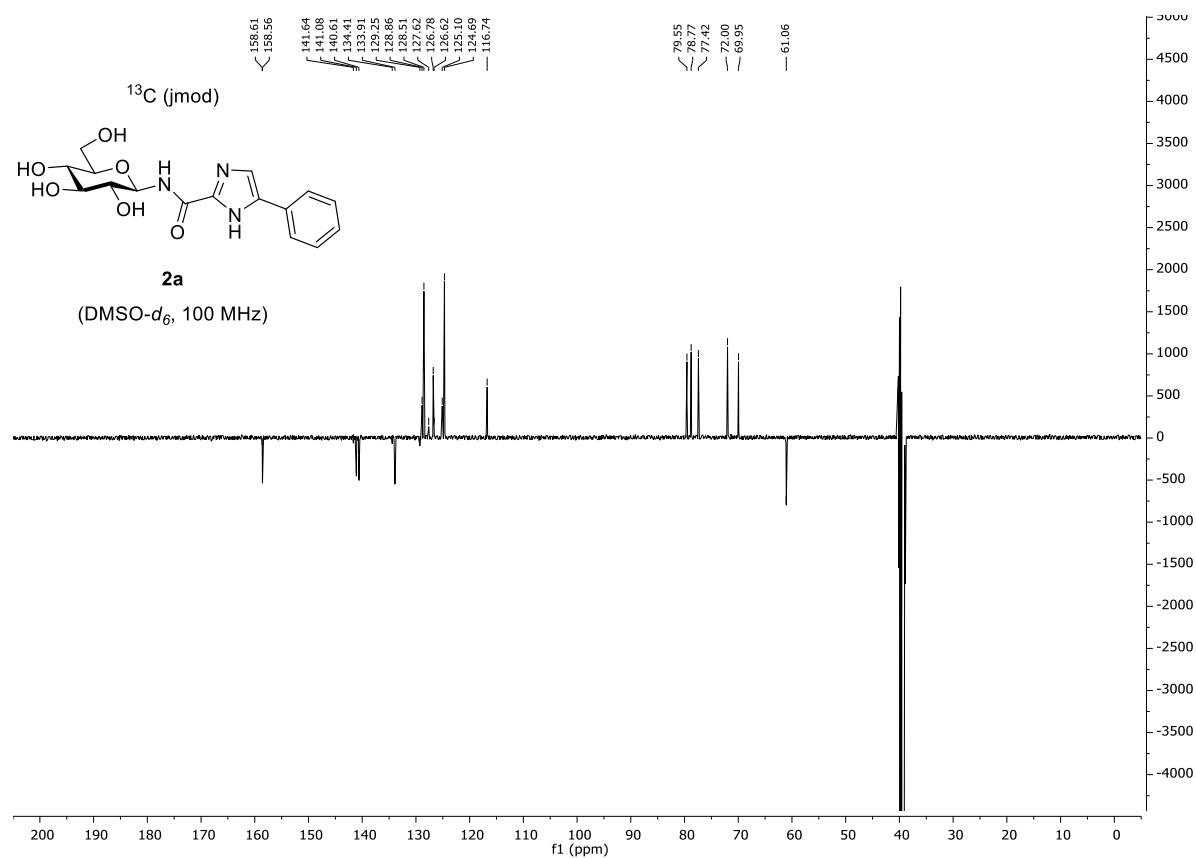



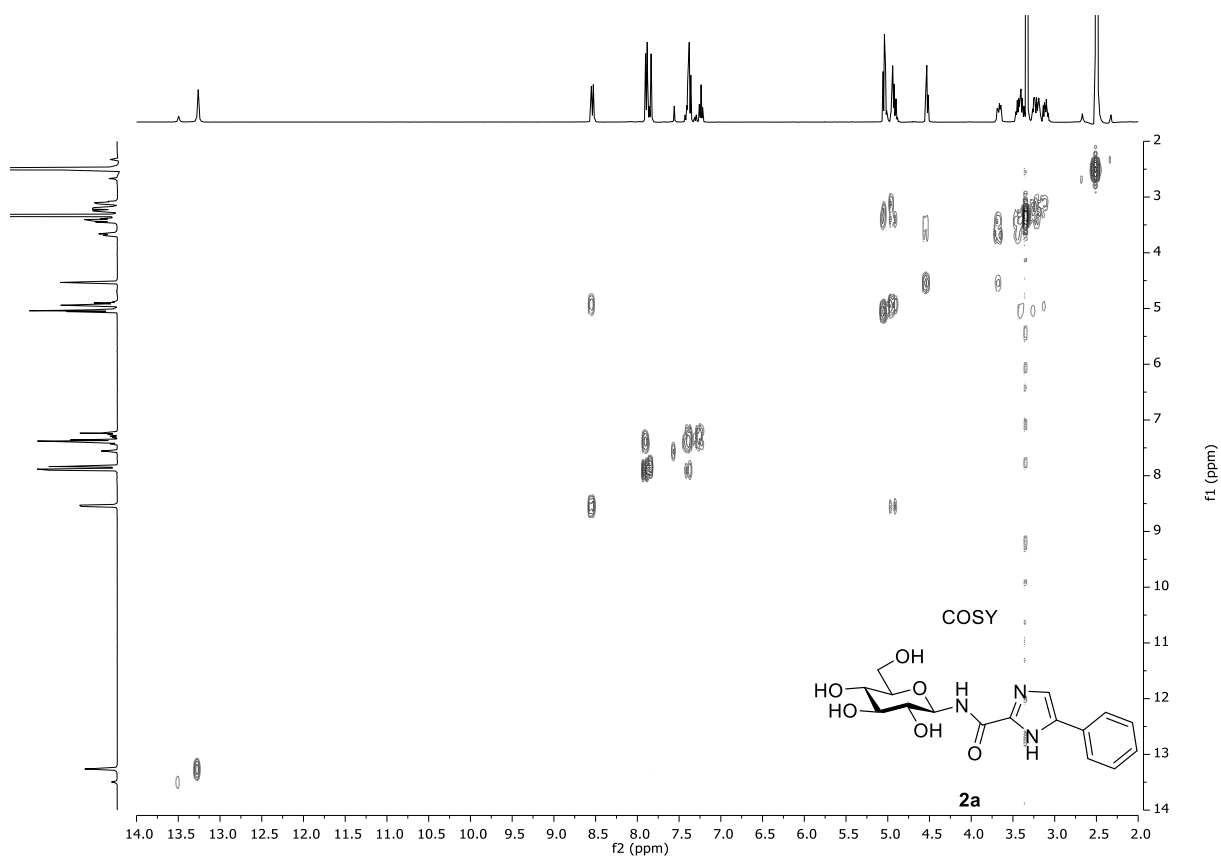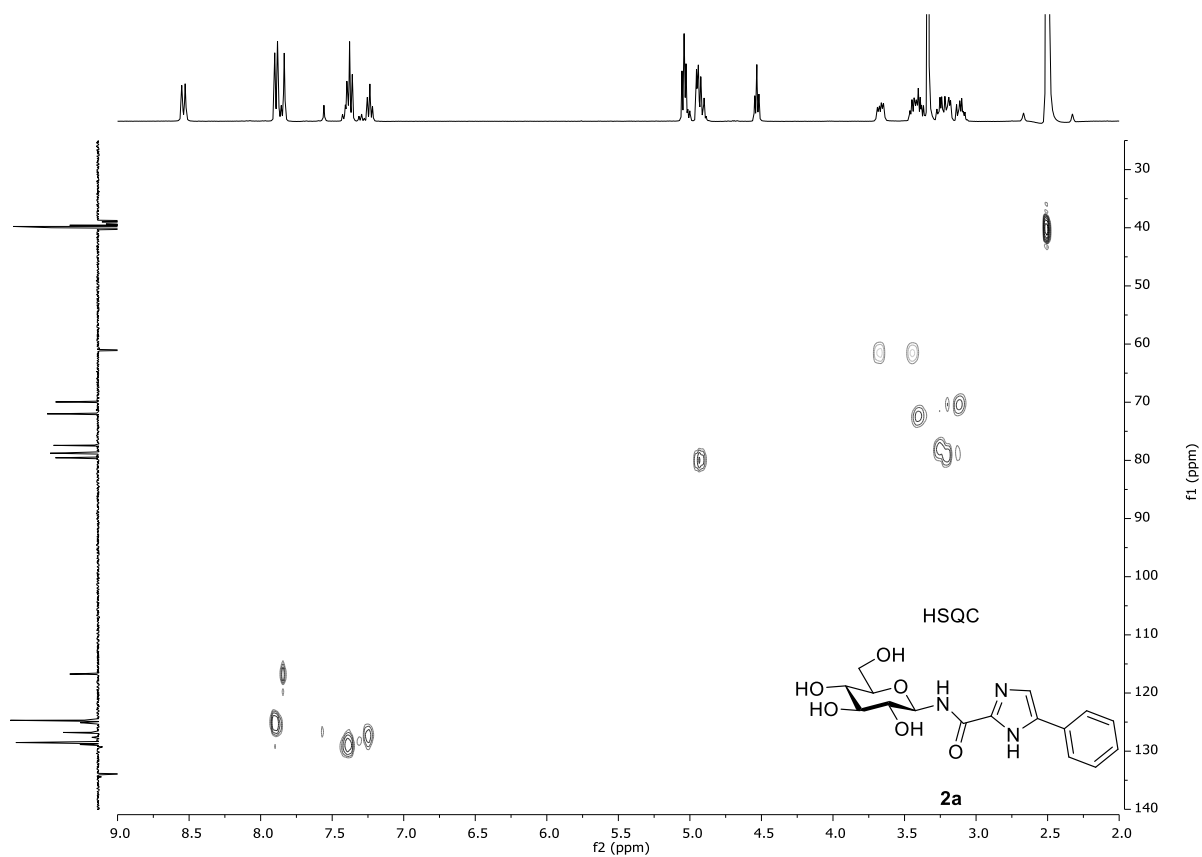

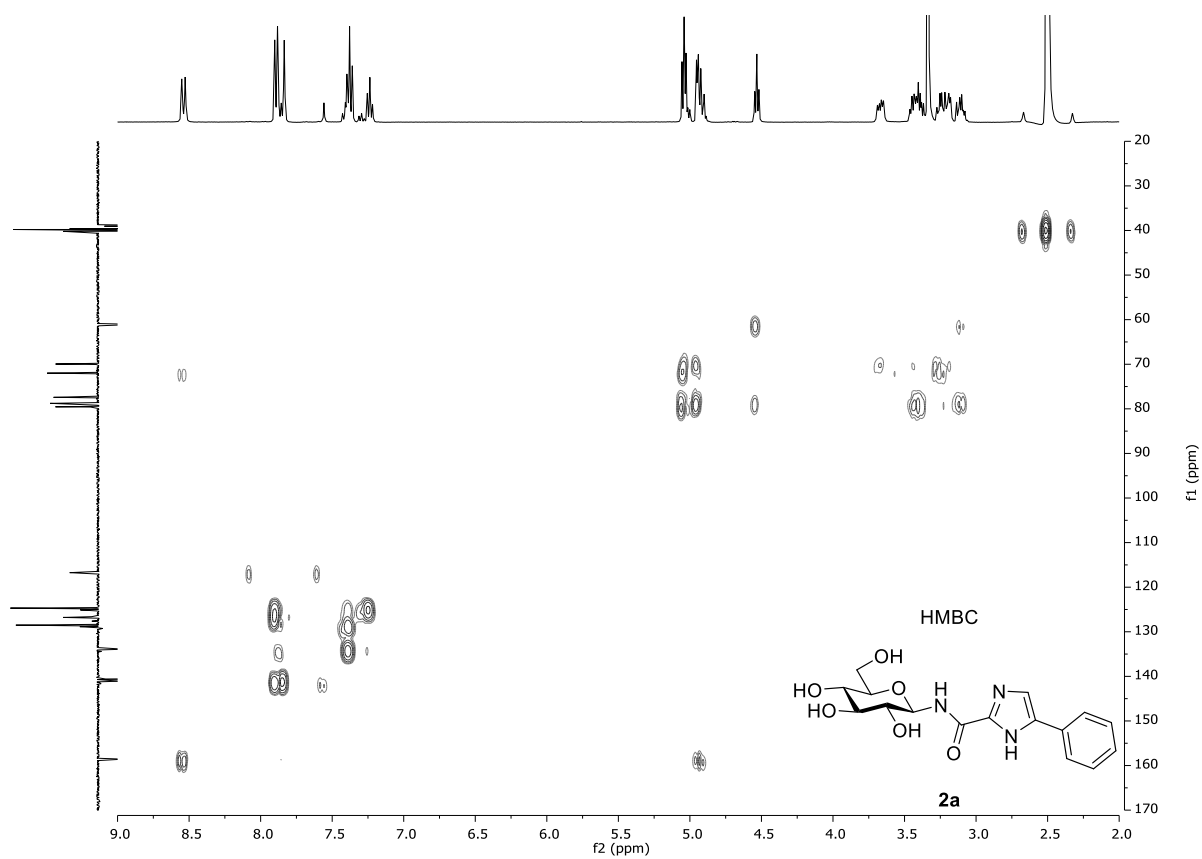

***N*-(β-D-Glucopyranosyl)-4(5)-(1-naphthyl)-1*H*-imidazole-2-carboxamide (2b)**

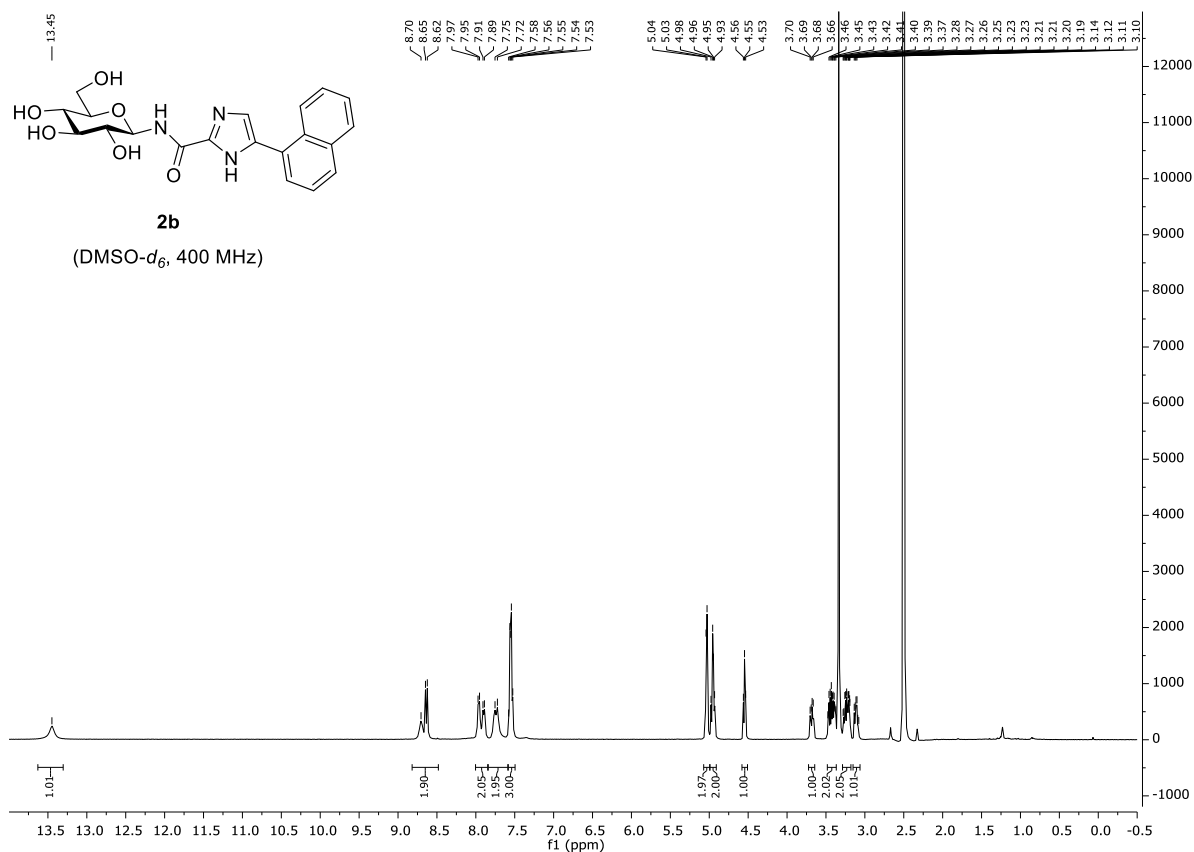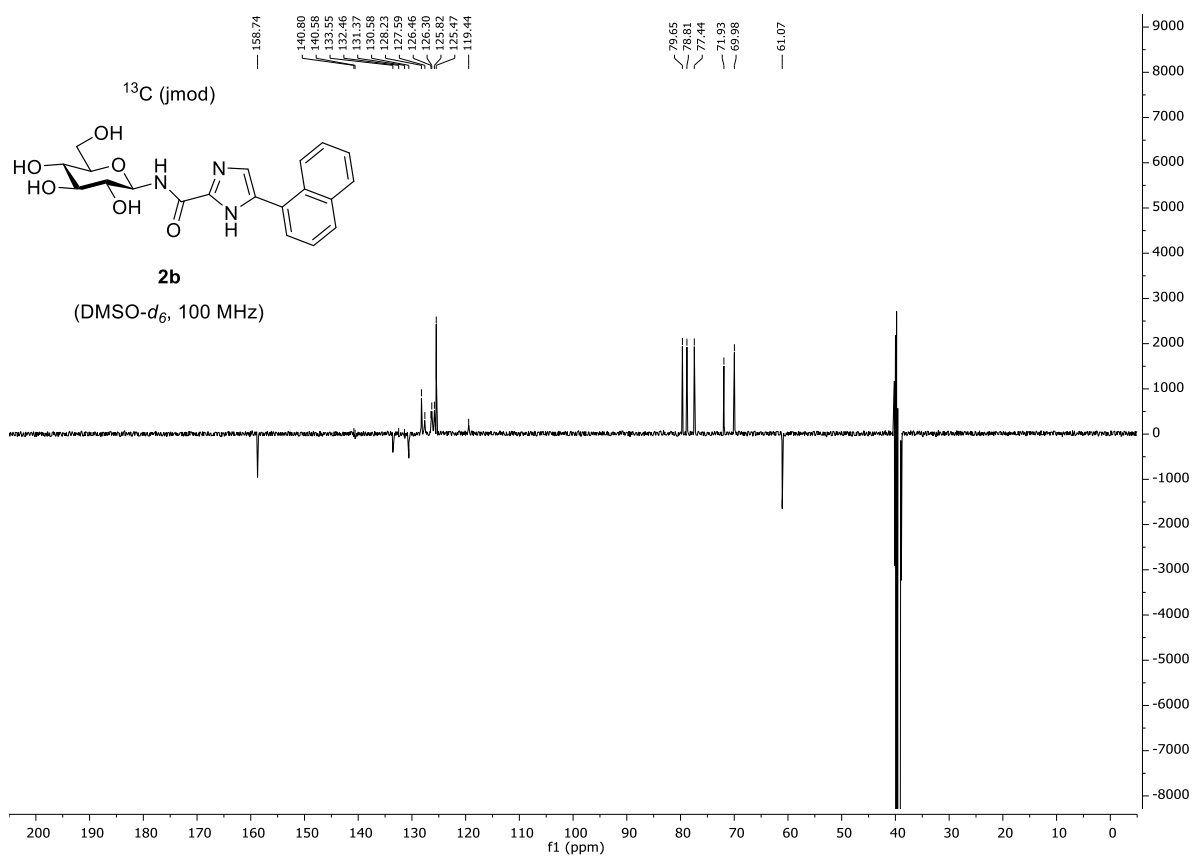

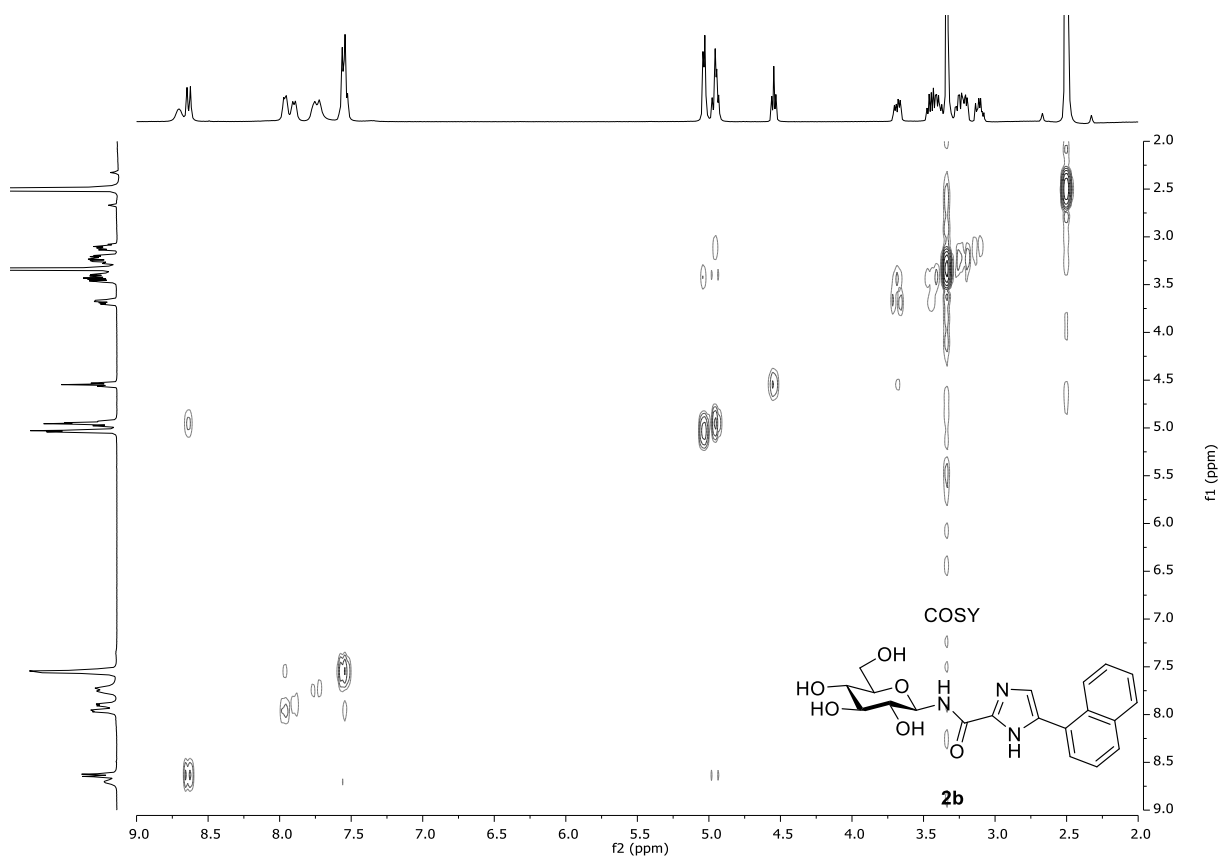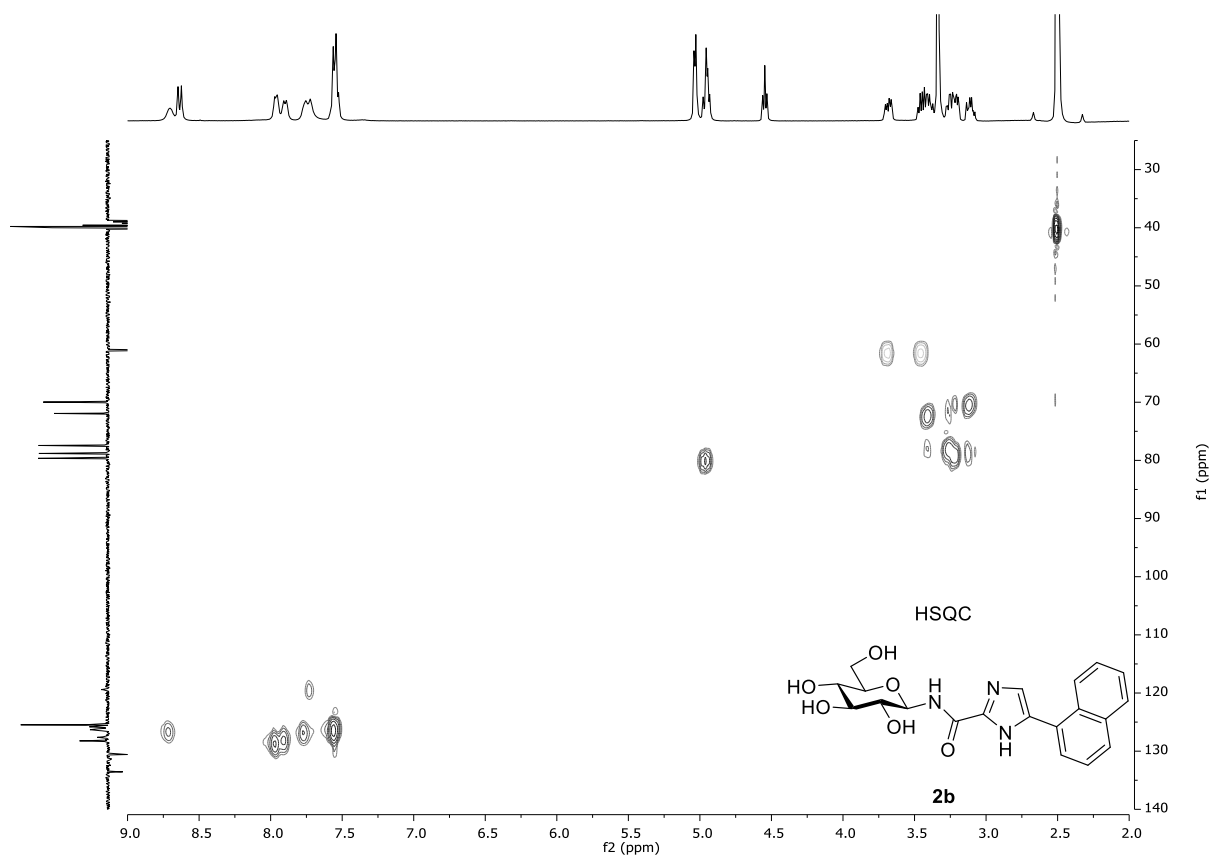

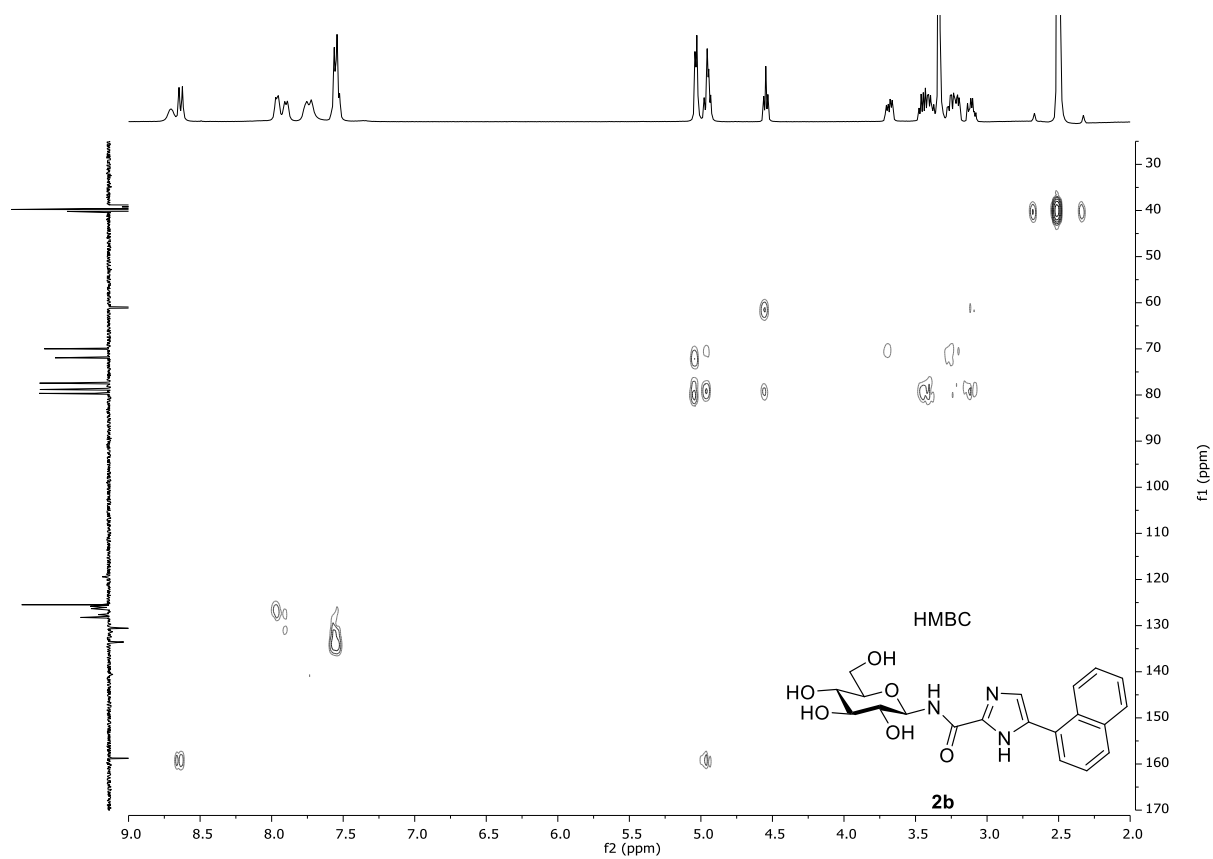

***N*-( $\beta$ -D-Glucopyranosyl)-4(5)-(2-naphthyl)-1*H*-imidazole-2-carboxamide (2c)**

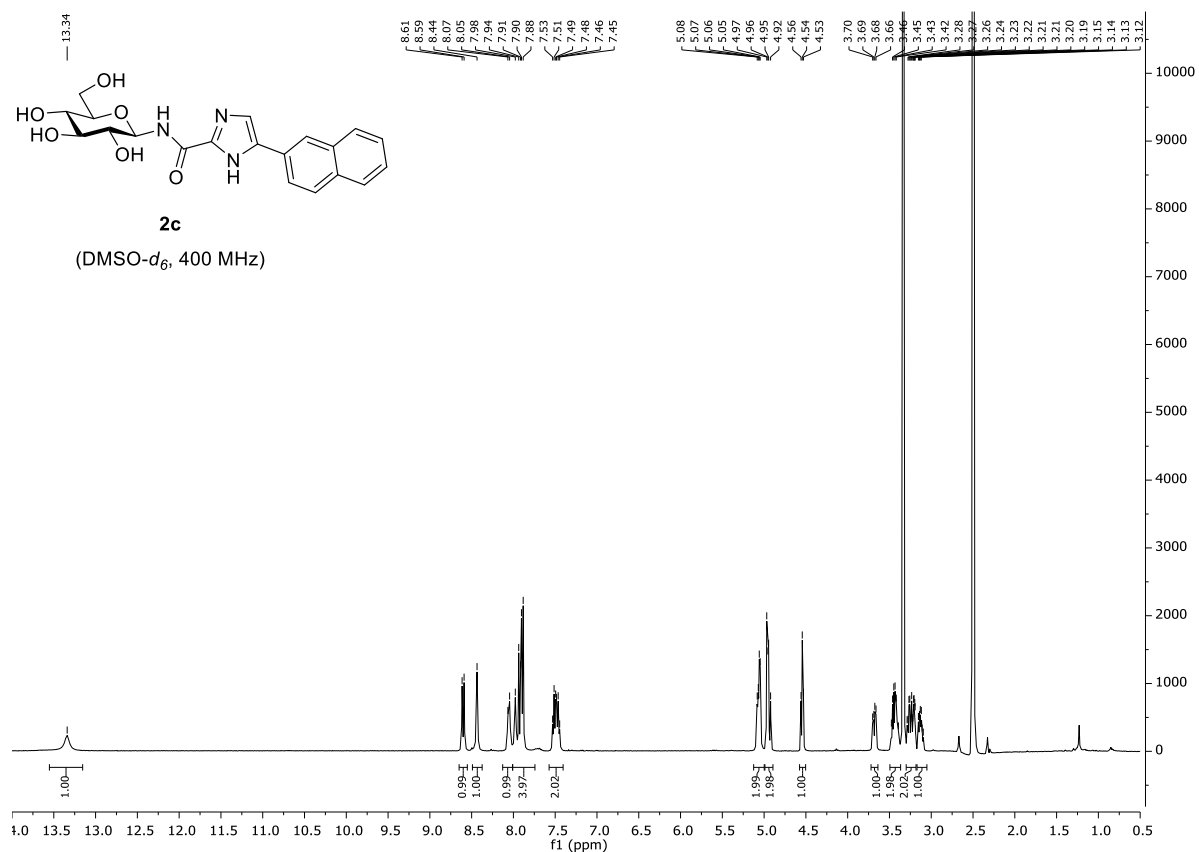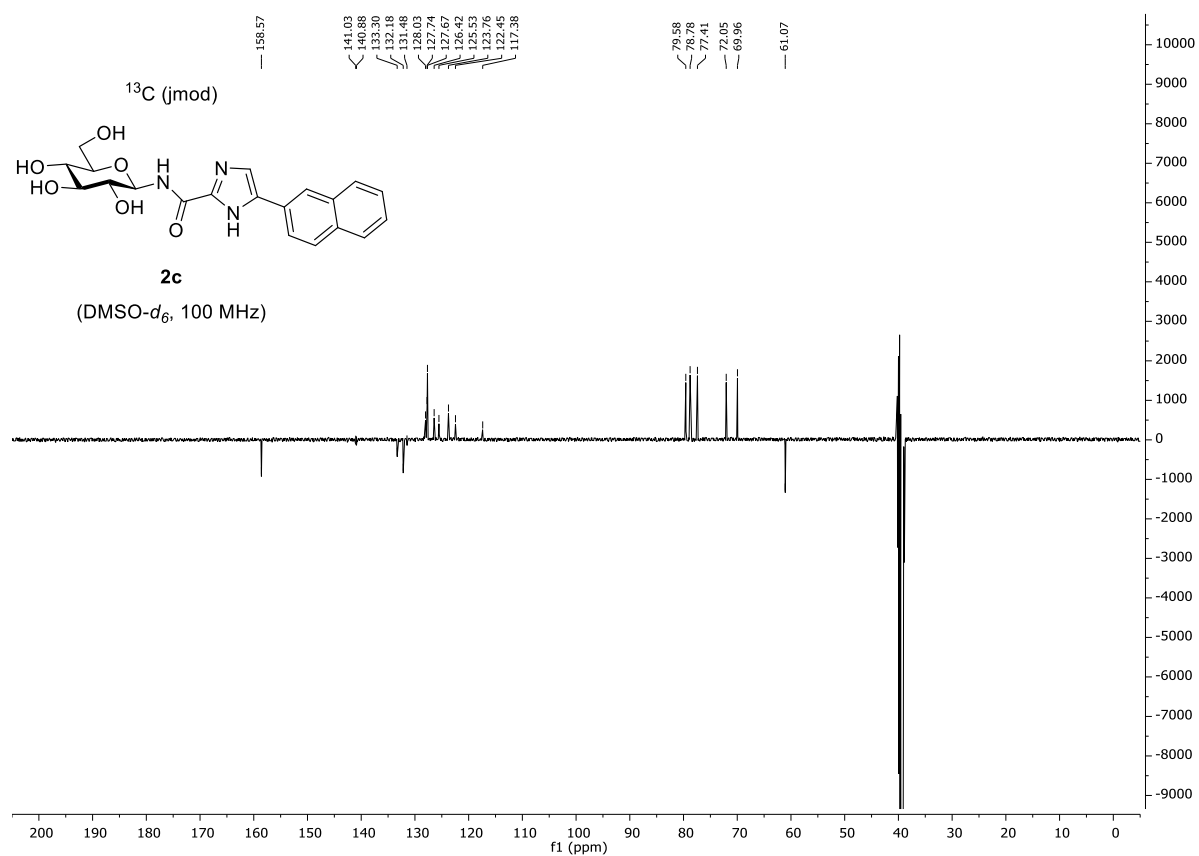

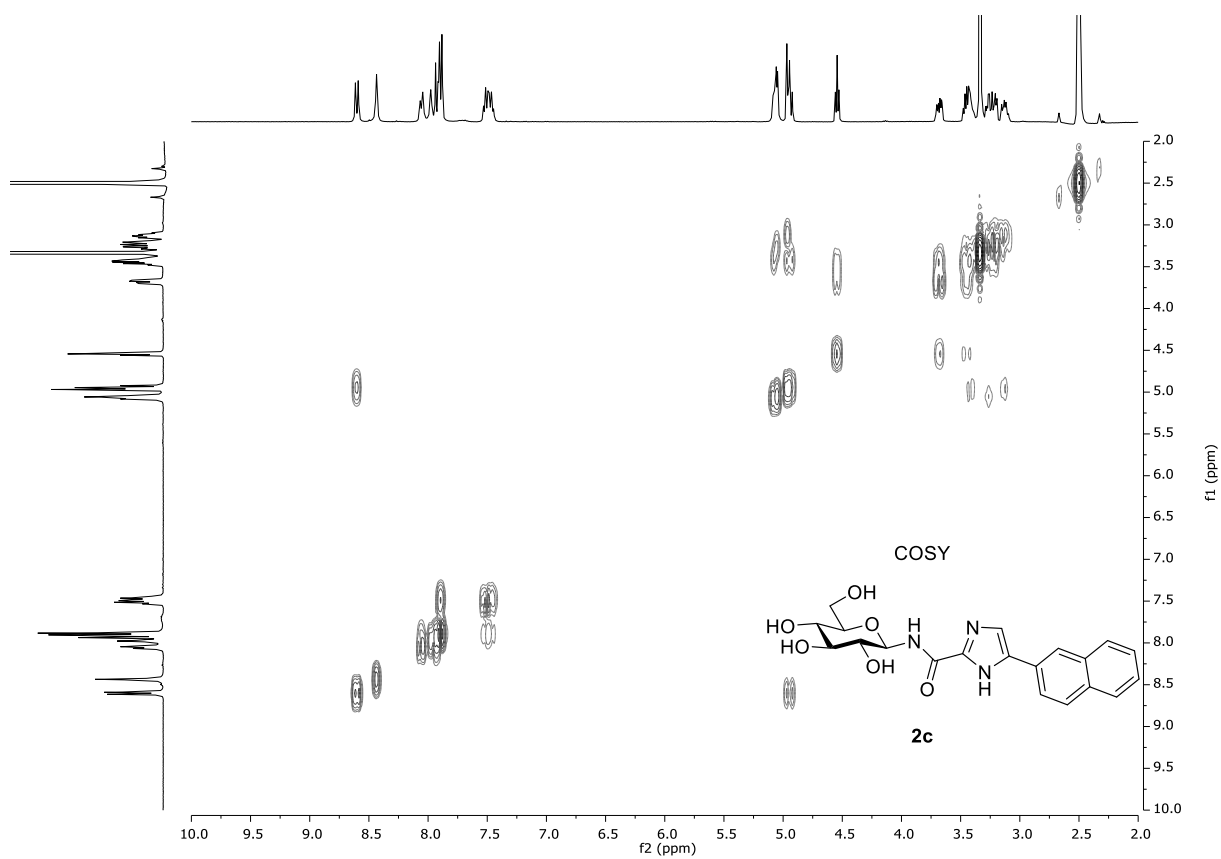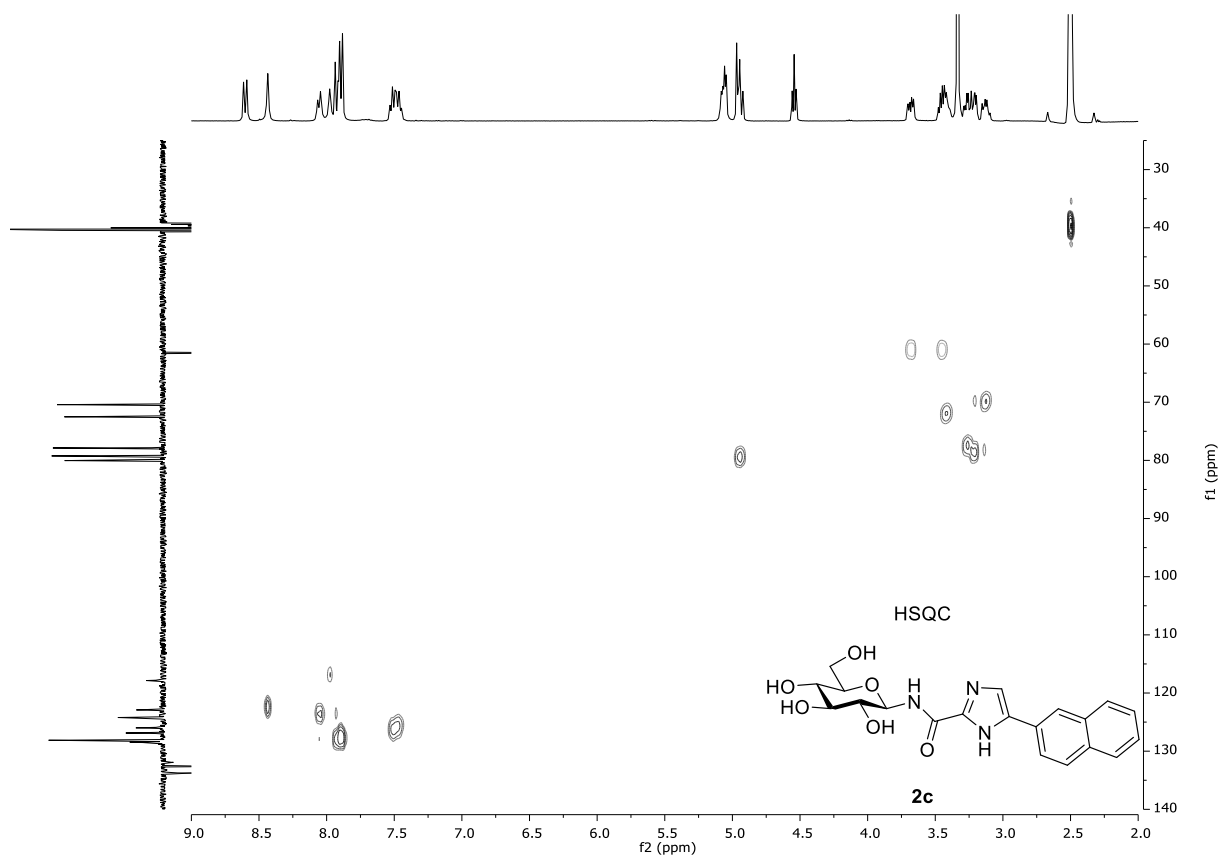

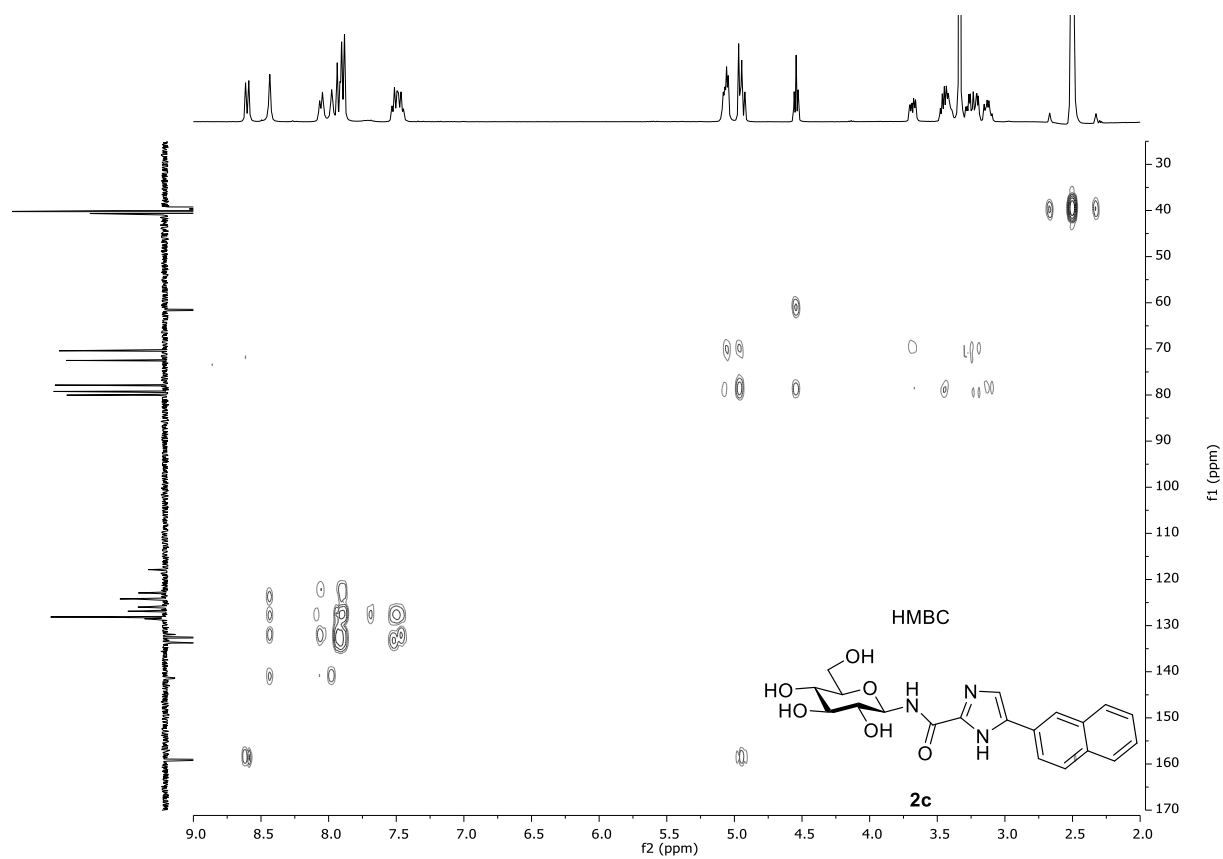

Supplement: s1 [file s1]
